# Supplementary material for: Fault Characteristic Extraction by Fractional Lower-Order Bispectrum Methods
Source: Hindawi journal article supplement (doi:10.1155/2020/8823389), 2020-12-31
Supplement: f1 [file 8823389.f1.zip]

Archive with 4 entries (4 files):
- 8823389.f1/ball fault signals.txt
- 8823389.f1/inner race fault signals.txt
- 8823389.f1/normal signals.txt
- 8823389.f1/our race fault signals.txt
