# Supplementary material for: Fault Characteristic Extraction by Fractional Lower-Order Bispectrum Methods
Source: Hindawi journal article supplement (doi:10.1155/2020/8823389), 2020-12-31
Supplement: f1 [file 8823389.f1.zip › 8823389.f1/ball fault signals.txt]

X222RPM	X222_BA_time	X222_DE_time	X222_FE_time
1796	0.028649	-0.0079593	0.091222
	0.0035811	0.02534	-0.072115
	-0.018308	0.00016244	-0.038625
	0.04913	0.092913	0.094098
	-0.021406	-0.0077969	-0.098618
	-0.010985	-0.048731	0.079305
	0.043939	0.085766	0.033078
	-0.03392	-0.020954	-0.10827
	-0.026959	-0.0047106	0.072731
	0.005432	0.078619	0.095125
	-0.087999	-0.041421	-0.12204
	-0.04414	-0.030375	-0.029585
	0.024223	0.080568	0.074169
	-0.031466	-0.0086091	-0.10889
	0.024746	-0.0934	0.08136
	0.027804	-0.064487	0.086907
	-0.014123	0.15415	-0.0094509
	0.062851	0.2391	0.093687
	0.034644	0.0089339	0.081155
	0.0019716	0.0097461	0.039036
	0.069852	0.15383	0.092249
	0.0048285	0.15415	-0.00061636
	-0.024826	-0.067411	-0.062047
	0.056091	-0.12962	0.15183
	0.003903	0.055066	-0.013971
	-0.002374	0.031675	-0.036982
	0.033115	-0.0084466	0.16827
	-0.036737	0.035736	0.039242
	0.014646	0.05539	0.019313
	0.060396	-0.0061725	0.1658
	-0.020038	-0.057177	0.0678
	0.031184	0.07602	0.05198
	0.050498	0.11468	0.16457
	-0.017503	-0.043208	0.039242
	0.05931	0.10802	0.10047
	0.053073	0.26428	0.011505
	0.01022	-0.01332	-0.11526
	0.080113	-0.11111	0.068211
	0.040519	0.066274	-0.046022
	0.018791	0.08739	-0.14176
	0.064742	-0.050842	0.025065
	-0.016658	-0.0056852	0.018491
	-0.043899	0.21409	-0.051569
	-0.0053516	0.12215	0.079305
	-0.049492	-0.11695	0.080127
	-0.0032995	0.055066	-0.00082182
	0.044784	0.15318	0.076224
	-0.0169	-0.063837	0.073142
	-0.016095	-0.074883	0.011095
	0.00080475	0.077806	0.078278
	-0.016739	0.11744	0.10149
	0.027885	-0.027614	0.039242
	0.0050699	-0.035736	0.083209
	-0.041726	0.065461	-0.024038
	0.026034	0.023391	-0.039447
	0.023901	-0.01803	0.1243
	0.0026154	0.045482	0.11197
	0.016216	0.060751	0.04746
	-0.02036	-0.049218	0.071293
	-0.022976	0.056203	0.051158
	0.003219	0.13726	-0.050336
	0.0041042	-0.11663	0.024449
	0.032713	-0.15707	-0.023627
	0.043134	0.035411	0.010273
	0.00072427	0.035411	0.072936
	-0.026557	-0.022416	-0.062253
	-0.058988	0.015919	0.07458
	-0.046756	0.11403	0.058144
	-0.028488	0.085116	-0.069238
	-0.034483	-0.042883	0.054856
	-0.021487	0.047918	0.020751
	-0.026154	0.049055	-0.086085
	0.0031385	-0.1816	0.061225
	0.030822	-0.017868	0.028764
	-0.0014485	0.18599	-0.063896
	-0.013117	-0.10022	0.0565
	-0.005593	-0.1163	-0.014793
	-0.026637	0.19167	-0.058555
	0.017383	0.14554	0.027736
	0.040318	-0.083979	-0.073758
	-0.025993	-0.067411	-0.054445
	-0.013681	0.12329	0.19867
	-0.016457	0.16016	0.033284
	-0.068645	-0.10867	-0.057938
	-0.030782	-0.12654	0.26627
	-0.016055	0.13791	0.10129
	-0.024464	-0.054903	-0.022395
	0.056654	-0.11842	0.26442
	0.063414	0.086578	0.098413
	0.038105	0.015756	-0.062664
	0.085867	-0.013157	0.1393
	0.050578	0.11159	-0.060815
	0.01364	0.20288	-0.080333
	0.04579	0.11111	0.054035
	0.017342	-0.0038984	-0.1845
	0.0096972	0.09941	0.02486
	0.048647	0.28442	0.14485
	-0.01014	0.064974	-0.065335
	-0.010341	-0.13303	0.12266
	0.0441	0.10672	0.16067
	-0.0082487	0.18891	0.0082182
	0.014003	-0.023391	0.15717
	0.060437	-0.13661	0.075196
	0.014888	0.076182	-0.069238
	0.032472	0.11728	0.089373
	0.043134	-0.11842	0.013765
	-0.034202	-0.20142	-0.058349
	-0.034483	0.021279	0.091838
	-0.046032	0.14116	0.026504
	-0.08981	-0.11793	-0.0069855
	-0.00012071	-0.12719	0.18183
	0.011347	0.16877	0.053829
	-0.014687	0.14635	0.04068
	0.081964	-0.08739	0.13909
	0.063535	-0.026477	-0.046844
	0.0373	0.1319	0.12861
	0.10277	0.18566	0.070471
	0.016256	0.04467	-0.20628
	-0.038708	-0.057827	0.032256
	0.0043859	0.16211	0.070882
	-0.04748	0.12914	-0.16745
	-0.036576	-0.019005	-0.0053418
	-0.031224	-0.0034111	0.08814
	-0.092707	-0.0058477	-0.070471
	-0.012071	0.026477	0.11526
	0.041766	0.03005	0.09492
	-0.016095	0.048893	0.0049309
	0.039151	-0.018193	0.21737
	0.085062	-0.082192	0.062047
	0.064179	-0.0032487	-0.033695
	0.096208	0.072446	0.21717
	0.027482	-0.089339	0.021162
	-0.037622	-0.1535	-0.065951
	-0.008651	0.1522	0.17628
	-0.074882	0.1855	-0.10067
	-0.073272	-0.089664	-0.12245
	0.0097777	-0.054091	0.052391
	-0.033236	0.26282	-0.13827
	-0.026436	0.040934	-0.064307
	0.05082	-0.22075	0.043762
	0.027361	0.10168	-0.040475
	0.019153	0.25405	0.046022
	0.0090534	-0.006335	0.096153
	-0.048124	-0.1332	0.031845
	-0.00060356	0.12134	0.1621
	0.024303	0.18989	0.11033
	-0.0065587	-0.12508	-0.1319
	0.033478	-0.14116	0.01582
	0.01179	0.10623	0.10232
	-0.019877	0.036385	-0.15512
	0.011347	-0.024365	-0.014998
	-0.0045871	0.06806	0.11978
	-0.013278	0.065299	-0.093276
	0.024303	-0.0032487	0.024038
	0.052389	0.037198	0.090195
	0.05931	0.10022	0.082182
	0.037139	0.038822	0.20032
	0.013158	-0.036548	0.028969
	0.021728	0.128	0.010067
	0.020119	0.20694	0.16025
	-0.01698	-0.063512	0.0096564
	-0.02881	-0.07602	0.0032873
	0.014244	0.072121	0.087935
	0.028206	0.041096	-0.039653
	-0.0038628	-0.027127	0.010067
	-0.00020119	0.0034111	0.16005
	-0.0024545	0.071959	0.024244
	-0.050256	0.069197	-0.037393
	-0.031063	-0.026802	0.18224
	0.015371	-0.074883	0.017258
	0.035932	-0.069035	-0.049104
	0.079227	-0.0307	0.15923
	0.039714	0.068548	-0.024244
	0.0051504	-0.088852	-0.019107
	0.046514	-0.076832	0.1243
	-0.018187	0.34339	-0.059376
	-0.076652	0.067248	-0.025887
	-0.047198	-0.32861	0.085675
	-0.062247	0.17527	-0.11752
	-0.023539	0.32779	0.072525
	0.028126	-0.13287	0.026298
	-0.053556	-0.20061	-0.15265
	-0.056493	0.2071	0.19066
	-0.0067599	0.20402	0.063896
	-0.055407	-0.35005	0.021984
	0.0022935	-0.15204	0.16662
	0.063696	0.41876	0.086291
	0.027885	-0.010071	0.0061636
	0.088039	-0.35557	0.058349
	0.098219	0.26818	0.10519
	0.02547	0.3546	-0.066156
	0.046233	-0.21571	-0.036571
	-0.00080475	-0.058314	-0.10047
	-0.067961	0.39764	-0.042118
	-0.0012071	0.13839	0.096769
	-0.0044664	-0.34875	-0.0059582
	-0.0039835	-0.08138	0.064102
	0.062207	0.35054	0.21182
	-0.026919	-0.029238	0.04972
	-0.085022	-0.30083	0.031024
	-0.010663	0.1868	0.18799
	-0.024545	0.28475	-0.063075
	0.0016497	-0.17104	-0.0036982
	0.06607	-0.079918	0.06554
	0.0089729	0.20905	-0.10992
	0.046756	-0.010233	-0.12019
	0.086712	-0.12784	-0.087113
	-0.018912	0.084629	-0.032873
	-0.013319	0.19249	0.050953
	-0.013721	0.026964	0.00020545
	-0.083654	-0.0934	-0.040269
	0.0061563	0.16731	0.14813
	0.047078	0.15334	0.093071
	0.0019314	-0.21604	0.084236
	0.06611	-0.10558	0.066978
	0.022774	0.15967	0.0071909
	-0.048285	0.026314	0.035955
	0.016739	-0.067898	0.088756
	-0.036053	-0.013807	0.089784
	-0.072387	0.043857	0.0076018
	0.012956	0.10575	0.10191
	-0.014968	0.048568	0.021162
	0.018831	0.0094212	0.082798
	0.10651	0.0086091	0.095947
	0.040479	0.11874	-0.11547
	0.058344	0.22903	-0.0088345
	0.091419	0.066111	0.13704
	0.017262	-0.053928	-0.010889
	0.076089	0.13937	-0.0069855
	0.091218	0.13742	0.10334
	-0.021728	-0.11549	-0.032462
	-0.010341	-0.048406	0.14443
	-0.032834	0.10396	0.14937
	-0.095765	0.017218	-0.029996
	-0.035208	-0.08138	0.017669
	-0.062489	0.024853	0.0063691
	-0.0746	0.097948	0.060609
	0.056694	-0.072771	0.066773
	0.071341	-0.11224	-0.010889
	0.069973	0.12166	-0.074785
	0.1084	0.15155	0.088756
	0.0080072	-0.027289	0.12759
	-0.018348	0.044832	-0.0024655
	0.022976	0.15464	0.073758
	-0.031184	0.01998	-0.01582
	-0.0027361	-0.042558	-0.0032873
	0.019797	0.036223	0.092249
	-0.019636	-0.010883	-0.062047
	0.022131	-0.074395	-0.085058
	-0.005593	0.067735	-0.014176
	-0.080716	0.11679	0.051364
	-0.046313	-0.039634	0.015615
	-0.025873	-0.083979	-0.016231
	-0.019193	0.11793	0.085058
	0.030339	0.12215	0.087729
	0.020602	-0.21295	0.14608
	0.010703	-0.06806	0.11485
	0.041726	0.22351	0.026093
	0.0052309	0.027614	0.026504
	-0.018187	-0.13742	0.041296
	-0.0038628	-0.00081218	0.10026
	-0.0038628	0.15041	0.0034927
	0.046514	0.032649	-0.055267
	0.048687	-0.1038	-0.032667
	0.014848	0.087553	-0.021778
	0.0045468	0.19297	-0.020545
	-0.033679	-0.0076345	0.01356
	-0.040278	0.050192	0.020751
	-0.039755	0.19216	-0.10396
	-0.019676	0.024365	0.033284
	0.038869	-0.10298	0.11937
	0.022613	0.020142	-0.023216
	-0.0046675	0.034924	0.028969
	0.014405	-0.10233	0.12861
	0.0091339	-0.076507	0.11321
	0.029051	0.053766	0.072936
	0.014365	0.13661	0.032051
	-0.034162	-0.05539	0.031845
	0.015733	-0.11777	0.096769
	0.040117	0.16552	-0.041296
	0.0053918	0.10818	-0.068005
	0.029454	-0.17218	0.086291
	0.0061161	-0.064649	-0.089167
	-0.052631	0.19346	-0.061431
	-0.011226	0.11955	0.18676
	-0.022372	-0.017218	0.044789
	-0.047601	0.044345	0.0080127
	0.020722	0.10185	0.16457
	-0.011347	0.0040609	0.046638
	-0.044744	-0.075207	0.037187
	0.018871	0.034599	0.11321
	-0.0035409	0.063999	-0.044378
	-0.0056332	-0.091451	0.0041091
	0.042531	-0.00016244	0.10807
	-0.021004	0.18842	-0.057733
	-0.012554	-0.063999	0.042118
	0.061322	-0.15854	0.071498
	2.35E-02	1.11E-01	-8.20E-02
	0.044784	0.12443	0.16519
	0.068001	-0.015106	0.059171
	-0.01179	-0.021279	-0.16375
	0.035369	0.24138	0.094509
	0.071904	0.26769	0.070265
	-0.015411	-0.14067	-0.076429
	0.020602	-0.070984	0.13683
	0.044543	0.26704	0.083415
	-0.010824	0.066111	-0.033695
	0.022815	-0.17965	0.17197
	0.00068404	0.041583	-0.00041091
	-0.063656	0.17868	-0.0084236
	-0.012031	0.035736	0.077662
	-0.037018	-0.12735	-0.13642
	-0.050659	-0.072121	0.033078
	0.048204	0.099898	0.10088
	-0.0054723	-0.066111	-0.11505
	-0.029615	-0.15967	0.042118
	0.030259	0.028913	0.19518
	-0.012635	0.12426	0.0041091
	0.014003	-0.00064974	0.10499
	0.062287	-0.0024365	0.1845
	0.00092546	0.044507	-0.076224
	0.030339	0.011533	0.053624
	0.062086	0.050517	0.1243
	-0.007967	0.072446	-0.16251
	0.030822	0.11208	0.012533
	0.01191	0.048081	-0.0057527
	-0.071663	0.080568	-0.14937
	-0.018912	0.11419	0.13375
	-0.023136	0.091289	0.068416
	-0.038266	0.013807	0.017464
	0.049774	-0.04467	0.19046
	0.03553	0.028264	0.12409
	0.02028	0.048243	0.095742
	0.072468	0.042396	0.18594
	0.0049894	-0.03736	0.017464
	0.014888	-0.018842	-0.048282
	0.09154	0.10575	0.0010273
	0.035047	-0.020467	-0.10047
	0.033397	-0.17738	-0.051364
	0.046474	0.092913	0.0018491
	-0.029494	0.16227	-0.077867
	-0.023619	-0.06936	-0.040064
	-0.035328	-0.033462	0.071087
	-0.0882	0.20434	-0.025682
	-0.022895	0.19021	0.066156
	-0.0057942	-0.12816	0.093482
	0.01018	-0.092588	-0.025887
	0.087355	0.18956	0.13375
	0.056131	0.078943	0.098413
	0.01014	-0.1535	-0.051158
	0.0070415	0.025502	0.053213
	-0.031305	0.24901	0.13375
	-0.029092	0.070659	-0.045405
	-0.01352	-0.11224	0.095331
	-0.060678	0.036061	0.068005
	-0.015652	0.066598	-0.1054
	0.039553	-0.05003	0.12327
	0.012514	-0.061888	0.045611
	0.014606	0.012183	0.034722
	0.020762	0.055066	0.08814
	0.0074842	0.013969	-0.0073964
	0.0014083	-0.014944	0.012944
	0.018549	-0.049055	0.19498
	0.028488	-0.054416	0.021573
	0.019918	0.050192	-0.098824
	-0.013359	0.060263	0.13909
	-0.051464	-0.1012	-0.02486
	-0.068645	0.055066	-0.047871
	-0.054481	0.18696	0.027736
	-0.045991	0.023878	-0.019518
	-0.043014	-0.050192	-0.034927
	0.027522	-0.01267	0.128
	0.040801	0.064162	0.034105
	0.010864	-0.043857	0.02938
	0.041042	-0.12962	0.16108
	0.018388	0.083817	-0.10129
	-0.012594	0.11517	0.12574
	0.00084499	-0.078781	0.074169
	-0.045307	0.0095837	-0.14772
	-0.027885	0.090314	0.073347
	0.029615	-0.035573	0.079305
	-0.025028	-0.045807	-0.12245
	-0.013801	0.0021117	0.05198
	0.014566	0.095837	0.094509
	-0.054079	0.12004	-0.15224
	-0.015049	-0.041096	0.1582
	0.056694	0.047756	0.091838
	0.028408	0.12686	-0.03616
	0.074801	-0.0034111	0.13108
	0.078221	0.017868	0.013355
	0.009657	-0.021604	0.022189
	0.061	0.038822	0.15779
	0.022935	0.18112	-0.044789
	-0.052791	-0.022091	-0.074785
	0.013882	-0.032812	0.24511
	0.0009657	0.18339	-0.033695
	-0.017745	0.061238	-0.0034927
	0.070375	-0.018842	0.18553
	0.044824	0.06806	-0.015409
	0.0087718	0.1038	0.010889
	0.043336	0.06335	0.12903
	-0.0091339	-0.018355	0.026709
	0.0041847	0.06335	-0.039653
	0.059632	0.13791	0.08588
	-0.010462	-0.049705	-0.094304
	0.01356	-0.10445	0.10848
	0.056534	0.075857	0.12266
	-0.048687	-0.0045482	-0.10293
	-0.013399	-0.063837	0.11957
	0.020239	0.12491	0.021162
	-0.055568	0.097136	-0.092865
	0.0084901	-0.048406	0.10786
	0.013681	0.020629	0.0069855
	-0.014244	0.12296	-0.16025
	0.067116	0.010396	0.16519
	0.028528	-0.1051	0.077045
	-0.019676	0.0017868	-0.031229
	0.031667	0.18193	0.16498
	-0.032954	0.10103	0.070471
	-0.048043	-0.074233	0.062458
	0.059431	0.075207	0.11464
	0.021768	0.11582	0.04972
	-0.012232	-0.020467	0.012944
	0.016538	-0.011858	0.078278
	-0.037783	-0.043857	-0.054856
	0.010059	0.0048731	0.028764
	0.033598	0.12914	0.074169
	-0.076532	0.0095837	-0.063075
	-0.013681	-0.086578	0.10704
	0.036777	0.040609	0.075402
	-0.026838	0.063512	-0.0024655
	0.034242	-0.053116	0.10519
	0.01352	-0.0627	0.11937
	-0.051182	0.11955	-0.0065745
	0.021165	0.13385	0.069033
	-0.0022533	-0.046456	0.062047
	-0.035007	0.014619	-0.061842
	0.042249	0.16292	0.00226
	0.023257	-0.010883	-0.083004
	0.0068001	-0.19362	-0.076429
	0.036898	0.041096	0.032051
	-0.047882	0.12702	-0.051775
	-0.070013	-0.128	-0.05424
	-0.028448	-0.051005	0.062869
	-0.072347	0.19947	-0.014176
	-0.02366	0.02599	0.032667
	0.029092	-0.20223	0.10211
	-0.0018912	0.028751	-0.01356
	0.052067	0.24089	0.061225
	0.034322	-0.054091	0.087113
	-0.038427	-0.1665	0.00452
	-0.011991	0.22676	0.046638
	-0.018067	0.22741	0.098413
	-0.010663	-0.1319	-0.028147
	0.041364	-0.089014	-0.0059582
	0.0080475	0.16893	0.070882
	-0.004909	0.040121	0.0030818
	0.028408	-0.16	0.091222
	0.006277	0.017705	0.063485
	0.0091339	0.16065	0.044378
	0.018751	0.044507	0.12225
	0.020119	-0.077644	0.019107
	0.058586	0.049705	0.025476
	0.079911	0.10493	0.087113
	0.068645	-0.096649	0.016231
	0.036455	-0.076507	0.023422
	-0.0035811	0.093888	0.010273
	-0.025993	0.08674	0.028558
	-0.038668	0.053766	-0.017053
	-0.034322	0.043695	0.04972
	0.0020119	0.052142	0.062664
	0.017061	0.11273	-0.099851
	0.042491	-0.010883	0.092249
	0.062931	-0.018355	-0.0039036
	0.03058	0.15821	-0.024655
	0.0373	0.015431	0.14567
	0.034966	-0.0095837	-0.015615
	-0.010261	0.1816	-0.021162
	0.012192	0.1137	0.066773
	0.021487	-0.0035736	-0.054856
	-0.0060758	-0.045644	-0.012327
	0.041203	0.025015	0.15121
	0.015532	0.095349	-0.041091
	-0.043255	-0.015594	0.13663
	-0.0095765	-0.057989	0.2184
	-0.038829	0.071634	-0.029996
	-0.036053	0.00016244	0.13457
	0.04068	-0.067898	0.23833
	0.003058	0.071959	0.02486
	-0.0036214	-0.12784	0.021367
	0.075365	-0.12475	0.20361
	0.04245	0.18859	-0.10232
	0.010019	0.10899	-0.058144
	0.012393	-0.0087715	0.088962
	-0.037944	0.063187	-0.13355
	0.0023338	0.16845	-0.05198
	0.061925	0.20337	-0.036571
	0.0017704	-0.011208	-0.056705
	-0.0024142	-0.050842	0.10273
	0.0087718	0.21409	0.057527
	-0.077658	0.079756	-0.022805
	-0.056453	-0.10412	0.21429
	-0.032069	-0.034924	0.055473
	-0.073353	-0.077157	0.015204
	0.0010864	-0.06806	0.15204
	0.0064782	-0.11241	-0.027531
	-0.036978	-0.18193	-0.057527
	0.025028	-0.032649	0.03842
	-0.017342	0.014619	0.022189
	-0.080435	-0.09405	-0.083209
	-0.0272	0.00048731	0.066362
	-0.058183	0.15578	-0.10786
	-0.044342	0.044832	0.040475
	0.063495	-0.034924	0.10211
	0.030098	0.083492	-0.13272
	0.022654	0.13368	0.18162
	0.057741	0.08073	0.093687
	-0.013238	-0.067248	-0.066156
	0.014485	0.0024365	0.069444
	0.043416	0.20857	0.056911
	-0.046836	0.088852	-0.13765
	-0.006277	-0.027289	0.10273
	0.030379	0.029888	0.017258
	-0.034001	-0.0040609	-0.091222
	-0.0010462	0.067086	0.13704
	-0.01702	0.10997	-0.020135
	-0.066271	-0.092263	0.077045
	0.019314	-0.03671	0.15101
	0.037984	0.10834	0.13067
	0.051343	0.065786	0.030202
	0.13387	-0.044995	0.14895
	0.071623	-0.078781	0.070471
	0.046152	0.037035	0.010889
	0.077417	0.075695	0.15676
	-0.014968	0.002599	-0.051158
	-0.018791	0.048243	-0.0026709
	0.011226	0.17299	-0.00904
	-0.039231	0.072771	-0.11238
	-0.017664	0.039147	-0.084031
	0.014848	0.03005	0.05424
	0.013761	-0.072284	-0.061636
	0.041042	0.0055228	0.057322
	0.0083291	0.16958	0.16395
	-0.04064	0.12524	0.038625
	0.029896	-0.12394	0.17854
	0.049894	0.075857	0.082593
	0.038105	0.25454	0.062047
	0.081843	-0.12264	0.083825
	0.045991	-0.15561	0.021778
	0.025712	0.22562	-0.11382
	0.02028	0.17169	0.089373
	-0.042249	-0.211	-0.026093
	-0.048204	0.018842	-0.10334
	-0.028729	0.36207	0.14895
	-0.02889	-0.034924	-0.053213
	0.032834	-0.31642	0.041707
	0.07621	0.15123	0.081155
	0.063092	0.33657	0.15923
	0.062167	-0.14408	0.028558
	0.043819	-0.11744	0.10807
	0.020159	0.31675	0.14156
	0.0079268	0.15269	-0.019313
	0.0047078	-0.19622	0.096769
	-0.011387	-0.001137	-0.1243
	-0.019716	0.16179	0.082182
	-0.012474	-0.14717	0.089784
	-0.04245	-0.18631	-0.055678
	-0.059551	0.15529	0.071498
	-0.035731	0.087877	0.15265
	-0.041968	-0.13726	-0.091838
	-0.03215	-0.00016244	-0.065951
	0.040921	0.10867	0.17279
	0.047681	-0.061238	-0.11218
	0.045669	-0.21425	-0.017669
	0.07126	0.021604	0.066567
	-0.015693	0.25665	-0.045405
	-0.074077	-0.00064974	-0.054035
	-0.060678	-0.17835	0.051569
	-0.078463	0.068872	-0.047049
	-0.038065	0.17397	0.011505
	-0.025148	-0.034924	0.011505
	-0.061764	-0.094537	-0.083415
	0.0075646	0.063999	0.17114
	0.028689	0.15415	-0.028558
	-0.042732	0.0084466	-0.025271
	-0.021487	-0.13401	0.16909
	-0.022171	0.068548	0.13252
	-0.044181	0.054903	-0.036776
	0.046917	-0.11565	0.10047
	0.069651	0.022416	0.089373
	0.035892	0.10477	-0.074169
	0.060879	0.055066	0.22641
	-0.0057942	0.014457	-0.033489
	-0.052228	0.012995	-0.1469
	0.03734	0.1051	0.13026
	0.031305	0.13206	-0.035955
	0.0088925	-0.078619	-0.052185
	0.059551	-0.074883	0.17197
	0.010582	0.077157	-0.036365
	0.005432	0.045482	0.048487
	0.025189	-0.0021117	0.2712
	-0.098702	-0.057177	-0.036365
	-0.10019	0.0022741	0.038625
	-0.0097777	0.12426	0.1545
	-0.010784	0.064649	-0.037393
	0.066673	-0.066274	-0.016231
	0.090856	-0.018842	0.057527
	0.020159	0.10558	-0.16909
	0.070576	0.12832	-0.034722
	0.04414	0.0934	0.066156
	-0.061	0.048081	-0.089167
	-0.008812	0.10071	0.14176
	-0.0067599	0.15123	-0.012738
	-0.040318	0.018518	-0.020751
	0.046997	-0.059289	0.2223
	0.019998	-0.08073	0.042529
	-0.013721	-0.072771	0.013765
	0.038467	0.050842	0.17155
	-0.018751	-0.062213	0.056089
	-0.011548	-0.08869	0.077456
	0.038024	0.19411	0.13334
	-0.025148	0.088527	0.0041091
	0.018751	-0.11906	0.053624
	0.090494	0.11127	0.078484
	0.03726	0.2547	0.0078073
	0.071904	-0.035248	-0.01808
	0.059471	-0.057989	0.078895
	-0.031586	0.30911	-0.1017
	0.053757	0.16666	0.068416
	0.061	-0.16893	0.16703
	-0.0061161	0.010071	-0.13108
	0.047641	0.26558	0.13272
	-0.00016095	0.010721	0.039858
	-0.038065	-0.28978	-0.035955
	0.018469	0.0934	0.15101
	-0.056534	0.30684	0.014998
	-0.064742	-0.11484	-0.068827
	0.025269	-0.13839	-0.0039036
	-0.02209	0.14912	-0.027531
	0.0062368	0.026314	-0.010478
	0.066432	-0.11565	0.07006
	0.0048687	0.043208	-0.037598
	0.044503	0.16585	0.10643
	0.058304	0.03005	0.083004
	-0.027764	-0.079593	-0.0071909
	0.017141	0.18631	0.065129
	0.048003	0.14294	0.011095
	0.0044261	-0.20288	0.043556
	0.043819	-0.10038	0.02486
	0.0020119	0.15821	-0.044378
	-0.07963	0.058964	-0.11464
	-0.057338	-0.1483	0.0791
	-0.081883	-0.019492	0.11834
	-0.069772	0.1012	-0.035544
	-0.0047882	0.014782	0.077662
	-0.026798	-0.078456	0.033078
	0.0068001	0.01202	0.021367
	0.082205	0.08869	0.17217
	0.083211	0.010071	0.08362
	0.064822	0.023228	0.032667
	0.019757	0.10461	0.061431
	-0.014284	0.045482	-0.053007
	0.023136	-0.010396	-0.044584
	0.048003	0.039309	0.037393
	-0.0056332	-0.0089339	0.041502
	-0.057057	0.028751	-0.069238
	-0.078141	0.002599	0.010273
	-0.071542	0.0056852	0.11937
	-0.039875	0.10981	-0.076635
	-0.028488	-0.031025	0.044173
	-0.0036616	-0.043857	0.080333
	0.012916	0.091613	0.014998
	0.036214	0.0066598	0.16457
	0.062609	-0.092263	0
	0.035771	0.0084466	0.013355
	0.031305	0.042233	0.13313
	0.010824	-0.0084466	0.033284
	-0.043577	-0.058964	0.062664
	-0.0047078	-0.045482	0.054035
	0.026396	0.14684	-0.095742
	-0.008812	0.06335	-0.073347
	0.018751	-0.090639	0.050131
	-0.00020119	0.055066	-0.049309
	-0.035731	0.067248	-0.0078073
	0.0055528	0.064812	0.13313
	-0.018147	0.11452	0.0028764
	-0.030057	0.019817	0.039242
	0.0079268	0.064162	0.19148
	-0.034966	0.056203	0.02034
	-0.054763	-0.10445	0.048282
	-0.0060758	-0.054578	0.16683
	-0.01867	-0.011695	-0.037187
	0.021205	-0.068548	0.074785
	0.076612	0.0071471	0.016231
	0.0086913	0.13352	-0.083209
	0.0078061	0.076507	0.12635
	0.058747	0.011208	0.00082182
	0.040076	0.023716	-0.04972
	0.087074	0.074558	0.050747
	0.086551	0.14522	0.028764
	-0.029655	0.05539	-0.076635
	0.0010462	0.032162	0.14567
	0.027361	0.12654	0.053829
	-0.0070013	0.12231	-0.11649
	0.053878	0.02469	0.1356
	0.01352	-0.027939	0.010067
	-0.029333	-0.036223	0.077867
	0.073634	0.085766	0.093893
	0.056212	0.12881	-0.0047255
	0.0019314	-0.028426	0.055473
	0.042088	0.08073	0.095536
	-0.044704	0.18436	-0.029791
	-0.068162	-0.046294	-0.049925
	0.0073634	-0.088852	0.070265
	-0.027643	0.044507	-0.056089
	0.021245	-0.023391	0.099645
	0.060115	-0.080568	0.03164
	-0.034524	-0.081705	-0.016847
	0.0070415	0.1038	0.1769
	0.072025	0.20337	0.13909
	0.013198	-0.0079593	-0.0069855
	0.04414	0.038984	0.04068
	0.036012	0.19508	0.10026
	-0.037461	0	-0.096769
	0.024344	-0.086091	0.082798
	0.0011266	0.14051	0.032051
	-0.064058	0.079918	-0.061636
	-0.01859	-0.084304	0.11012
	-0.073192	-0.090801	0.021984
	-0.073715	0.050517	0.095331
	0.042692	0.081867	0.15717
	0.028045	-0.10607	0.0018491
	0.031908	-0.11062	0.13642
	0.07452	0.060426	0.211
	-0.0068806	0.14408	-0.059582
	-0.001529	0.0092588	0.014587
	0.029373	-0.024203	-0.01356
	-0.035288	0.016893	-0.13375
	0.005432	0.083492	-0.037187
	0.0101	0.039634	-0.053007
	-0.04909	-0.1332	-0.081565
	-0.0031385	-0.04272	-0.028353
	-0.0068001	0.097136	0.053213
	-0.073675	0.077969	-0.025682
	-0.039634	-0.0061725	0.064513
	-0.024746	-0.0022741	0.12348
	-0.022292	0.031675	-0.0096564
	0.056574	0.0022741	0.11793
	0.032109	-0.061563	0.093893
	-0.0091339	-0.033949	-0.049925
	0.011106	-0.0050355	0.14115
	-0.035007	-0.042396	0.080538
	-0.048043	0.046456	-0.0053418
	-0.016095	0.056852	0.065951
	-0.035449	-0.0079593	-0.069238
	-0.021849	0.018842	-0.032051
	0.037743	0.064487	0.04746
	0.055608	0.05068	0.0078073
	0.061805	0.032649	-0.05876
	0.057419	0.085603	0.11464
	0.026114	0.089014	0.0059582
	0.022332	0.03005	-0.073347
	0.017222	0.06936	0.19765
	0.0028971	0.074233	-0.0018491
	0.01694	-0.075207	-0.0053418
	0.033719	-0.049218	0.12266
	0.0045066	0.070984	-0.047871
	-0.022292	0.04337	-0.032256
	-0.00088522	-0.022091	0.13724
	-0.010784	0.10396	-0.023011
	-0.0062368	0.14294	-0.024449
	0.037461	-0.086253	0.12286
	0.039231	0.067411	0.0065745
	0.054844	0.18453	0.063075
	0.060437	-0.11143	0.11547
	-0.0064782	-0.077319	0.030407
	-0.011186	0.14359	0.083004
	0.01348	0.069035	0.13765
	-0.016175	-0.11094	-0.12779
	0.017946	-0.046456	0.025887
	0.031345	0.23179	0.058555
	-0.012071	0.060263	-0.11875
	0.024223	-0.23845	0.11033
	0.02028	0.16162	-0.0096564
	-0.032834	0.32714	-0.0080127
	0.0081682	-0.061563	0.098002
	-0.0026557	-0.04467	0.084853
	-0.016578	0.16601	0.051775
	0.070375	0.062213	0.12656
	0.043054	-0.099085	0.10643
	0.0099386	-0.089989	-0.00904
	0.081642	0.074883	0.13622
	0.028488	0.047593	0.032667
	-0.036214	-0.039959	-0.0010273
	-0.0015693	0.12719	0.14731
	-0.031264	0.090476	0.023627
	-0.0050699	-0.033787	0.010273
	0.044422	0.090801	0.14423
	-0.033518	0.13628	-0.11957
	-0.036576	-0.074558	0.0452
	0.008651	-0.076669	0.18368
	-0.039956	0.057177	-0.13211
	-0.014727	0.024203	0.094098
	0.0088522	-0.0087715	0.067389
	-0.039594	-0.019005	-0.084853
	0.034041	0.036873	0.07006
	0.054844	-0.021279	0.11731
	-0.017061	-0.063999	-0.019929
	0.0070415	0.0095837	0.025271
	-0.0095765	0.057827	0.041502
	-0.060758	-0.0043857	-0.095742
	-0.025832	0.062375	0.059171
	-0.060517	0.10623	-0.083825
	-0.085746	-0.13222	-0.098618
	0.0095765	-0.058152	0.10252
	-0.017383	0.070172	-0.025271
	-0.01694	-0.023716	-0.010478
	0.050417	-0.083817	0.13539
	-0.017704	0.051817	0.034516
	0.0067599	0.14229	0.022395
	0.070174	0.052142	0.18861
	-0.0088522	0.077482	-0.031229
	-0.0086913	0.12654	-0.0059582
	0.023901	0.030863	0.13642
	-0.036133	-0.12832	-0.081565
	0.016377	0.0061725	0.035749
	0.012635	0.15334	0.12553
	-0.062046	-0.025502	-0.033695
	0.016095	-0.13563	0.023627
	0.019073	0.089664	0.086702
	-0.015169	0.13466	-0.023216
	0.053636	-0.10834	0.16025
	0.026838	-0.082842	0.13868
	-0.0009657	0.074558	-0.04746
	0.066512	0.14083	0.19826
	0.0034604	0.044182	0.029585
	-0.017302	0.033787	-0.11074
	0.037984	0.11842	0.11012
	0.008651	-0.026314	-0.076224
	0.053516	-0.066761	-0.13807
	0.0474	0.090151	0.089167
	-0.031828	0.037847	-0.095742
	0.0070013	-0.083492	-0.1204
	0.025993	0.092101	0.079305
	-0.021728	0.18388	0.019313
	0.017825	0.016244	0.056911
	0.019073	-0.052791	0.056911
	-0.0044664	0.12605	-0.0078073
	0.060758	0.13044	0.082182
	0.028448	-0.051167	0.15039
	-0.011186	0.034599	0.019313
	0.027402	0.14522	0.099645
	-0.00169	0.049868	0.17998
	-0.0044664	-0.027452	-0.059582
	0.042491	0.15155	0.037187
	0.015934	0.10071	0.12903
	0.033437	-0.13969	-0.066362
	0.063776	-0.051654	0.080127
	0.0091339	0.16016	0.16703
	-0.00084499	0.12118	-0.012122
	-0.015773	-0.13645	0.16416
	-0.0099386	-0.043045	0.10601
	0.038547	0.14343	-0.12985
	0.025269	-0.026802	0.11382
	0.024223	-0.14002	0.072525
	0.028287	0.01803	-0.014176
	0.011629	0.017543	0.044995
	0.00080475	-0.023878	-0.089989
	-0.049572	0.14895	-0.0018491
	-0.061483	0.081055	0.12266
	-0.020843	-0.044995	-0.028558
	-0.029092	0.0082842	-0.074375
	-0.016256	0.10932	0.10396
	0.011629	0.07602	0.07684
	-0.004909	-0.13774	-0.035133
	0.017745	-0.062538	0.07684
	0.01022	0.13563	0.020956
	-0.050619	-0.014619	-0.069649
	-0.013319	-0.082355	0.1167
	-0.00084499	0.097948	-0.10252
	-0.021487	0.070659	-0.06328
	0.027925	-0.060263	0.11362
	-0.020239	0.0061725	-0.10458
	-0.058545	0.053604	0.11814
	-0.018268	-0.039959	0.10067
	-0.060839	-0.07407	-0.05424
	-0.071019	0.04337	0.15902
	-0.01702	0.08739	0.20463
	-0.018871	-0.15334	0.0452
	0.030782	-0.179	0.113
	0.10168	0.13433	0.12615
	0.048285	0.14554	-0.1093
	0.03903	-0.079756	0.069649
	0.056292	0.058314	0.017258
	-0.01018	0.23261	-0.19066
	0.013319	0.1228	0.05424
	0.039996	0.070334	-0.10786
	-0.043416	0.09941	-0.12512
	-0.0053516	0.10558	0.23175
	0.028206	0.015594	-0.026093
	-0.058747	-0.017056	-0.027531
	-0.0090936	0.066274	0.31578
	0.0032995	0.05003	0.075196
	-0.027764	-0.14457	-0.055267
	0.072749	-0.044507	0.1319
	0.053113	0.17754	0.049515
	-0.0018107	-0.096324	-0.045405
	0.058545	-0.22514	0.061636
	-0.0030983	-0.0068223	-0.064513
	-0.066351	0.12053	-0.083209
	-0.024545	0.030863	0.098413
	-0.08808	-0.11565	-0.046638
	-0.063293	0.02404	0.083415
	0.046836	0.23504	0.18388
	0.029373	0.040446	-0.078895
	0.073433	-0.11598	0.16929
	0.11918	0.17462	0.17998
	0.061724	0.095025	-0.091427
	0.091097	0.00097461	0.11464
	0.065386	0.25047	0.053829
	-0.032914	0.15448	-0.067389
	0.02209	-0.020629	-0.00226
	0.0034202	0.0094212	-0.054035
	-0.076532	0.15448	-0.035133
	-0.01187	0.14993	-0.016025
	-0.029092	-0.15513	0.054035
	-0.049371	-0.16731	0.13539
	0.046595	0.28719	0.12594
	0.020521	0.13498	0.063075
	0.036817	-0.26493	0.11629
	0.13105	-0.022416	0.20011
	0.093673	0.15513	0.078484
	0.1012	-0.0017868	0.072115
	0.082326	-0.12881	0.082182
	-0.044503	0.038172	-0.039447
	-0.043295	0.14083	-0.0051364
	-0.043134	-0.020142	0.025682
	-0.11588	0	-0.10252
	-0.053113	0.1241	-0.038831
	-0.0065989	0.035736	-0.016642
	-0.022452	-0.10558	-0.090195
	0.042531	0.051005	0.013971
	0.022131	0.17169	0.043351
	-0.021004	-0.0021117	0.052391
	0.019596	-0.055553	0.058144
	-0.029896	0.072121	0.074991
	-0.057902	0.048731	0.0339
	0.0018509	-0.147	0.059582
	-0.014848	-0.11614	0.055267
	-0.01525	0.022903	-0.013355
	-0.00076451	-0.012832	0.01808
	-0.053113	-0.095187	-0.058965
	-0.03722	0.011208	-0.054035
	-0.011106	0.15578	0.055884
	-0.022976	-0.021279	0.032462
	0.03903	-0.072446	-0.051569
	0.077417	0.12962	0.07006
	0.066191	0.14034	0.11403
	0.071462	0.0071471	0.062458
	0.027321	-0.010233	0.034927
	-0.017302	0.13774	0.053007
	-0.011588	0.19817	0.11177
	0.0050699	-0.003736	0.03842
	0.0042249	-0.064487	-0.013149
	0.0025752	0.013807	-0.016642
	0.015129	0.080243	0.088551
	0.0010864	0.14635	-0.025271
	-0.0068001	-0.073746	0.019724
	-0.013922	-0.13271	0.14135
	-0.037421	0.11728	-0.036571
	-0.010462	0.10688	0.053213
	0.032311	-0.11809	0.052596
	0.012635	-0.14587	0.0041091
	0.039553	-0.064162	0.10375
	0.073916	0.048568	0.12286
	0.011106	0.064812	-0.071087
	-0.014284	-0.026314	-0.0061636
	-0.028488	0.10607	0.093276
	-0.059511	0.10266	-0.11505
	-0.020521	-0.014457	0.039653
	0.0027764	0.094212	0.0049309
	-0.018751	0.10185	-0.098207
	0.027925	0.013645	0.083209
	-0.0072025	0.083329	0.069444
	-0.094316	0.061888	-0.0026709
	-0.026838	-0.082355	0.16498
	-0.01702	-0.044345	0.12759
	-0.03384	0.086253	0.042118
	0.053636	-0.044345	0.18573
	0.066432	-0.20548	0.032667
	0.073111	0.097299	0.087524
	0.10981	0.27581	0.14074
	0.032472	-0.14587	-0.028353
	0.0035409	-0.15464	-0.050542
	0.046716	0.44523	0.0047255
	-0.012836	0.28524	-0.028147
	-0.01529	-0.35622	-0.027736
	0.034001	-0.075207	0.16786
	0.0019716	0.44069	-0.071087
	0.030701	0.0082842	-0.010273
	0.026677	-0.38741	0.21429
	-0.081038	0.076832	-0.04294
	-0.055286	0.39001	0.12307
	-0.0022935	-0.016244	0.11588
	-0.014284	-0.20548	-0.12903
	0.076008	0.21571	0.10848
	0.077779	0.20954	0.020545
	0.0069611	-0.18063	-0.27716
	0.056493	-0.01868	0.02034
	0.0029776	0.24723	-0.018491
	-0.062569	-0.062213	-0.09266
	-0.017101	-0.18956	0.17936
	-0.065386	0.17348	-0.011916
	-0.049532	0.16049	0.023422
	0.049733	-0.22172	0.21778
	0.0072427	-0.16601	0.12327
	0.018026	0.21977	0.041091
	0.072789	0.097948	0.10006
	-0.015169	-0.24122	0.023627
	-0.014807	-0.027614	-0.0078073
	0.0237	0.24836	0.10499
	-0.065748	0.0071471	-0.055473
	-0.047239	-0.16276	-0.029175
	0.0090534	0.040446	0.084647
	-0.0061966	0.09275	-0.014382
	0.066834	-0.020142	0.08362
	0.036254	0.0947	0.079716
	-0.03054	0.22189	-0.14916
	0.076612	0.038335	0.085264
	0.096449	-0.01202	0.12307
	0.04913	0.16601	-0.038831
	0.077135	0.077806	0.1206
	0.01702	-0.11338	-0.061636
	-0.031144	-0.043208	-0.05198
	-0.0038226	0.12784	0.16149
	-0.1012	0.082679	0.044378
	-0.081762	-0.071147	-0.0059582
	-0.00068404	-0.0082842	0.069033
	-0.056936	0.08739	0.0018491
	0.022694	-0.0027614	0.013149
	0.096811	0.020467	0.1093
	0.061322	0.1038	-0.028147
	0.10759	0.029401	0.019313
	0.081964	-0.00081218	0.14834
	-0.023941	0.11906	0.00061636
	-0.00020119	0.17283	0.047049
	-0.010542	-0.039309	0.087935
	-0.041203	-0.19184	-0.098618
	0.029253	-0.00081218	0.069855
	-0.0055125	0.10672	0.12266
	-0.063092	-0.096162	-0.086907
	-0.030057	-0.060101	-0.017875
	-0.04921	0.15854	0.04068
	-0.043658	0.086091	0.03616
	0.015491	-0.045157	0.096975
	-0.0059551	0.013807	0.051775
	0.0098179	0.068872	0.0018491
	0.058103	-0.04402	0.11259
	0.029373	-0.053928	0.11629
	0.021326	0.065786	0.048898
	4.02E-05	0.031188	0.083004
	-0.04245	-0.079268	0.033695
	-0.028448	0.0022741	-0.086291
	-0.0018107	0.099573	0.11526
	0.022895	0.020629	0.032462
	0.041082	0.010883	-0.15491
	0.011468	-0.0040609	0.087935
	-0.0082084	0.051817	-0.014382
	-0.019918	0.1306	-0.053418
	-0.035731	0.074558	0.084442
	-0.016014	0.022578	-0.0113
	-0.020038	0.0045482	-0.049309
	0.0061161	-0.0017868	0.15347
	0.034162	0.0082842	-0.036571
	0.017745	0.01202	-0.036982
	0.027321	-0.1051	0.15943
	-0.015451	-0.039634	-0.079511
	-0.048124	0.059451	0.10704
	0.0026557	0.082679	0.20689
	0.0093351	0.041259	0.044995
	0.0096167	-0.07407	0.014793
	0.048406	0.04337	0.10622
	0.027563	0.18014	-0.073142
	0.01867	-0.0043857	0.016025
	0.03227	-0.21295	0.11218
	-0.016135	0.024528	-0.17299
	-0.0020119	0.22465	0.14115
	0.02201	0.12085	0.021984
	-0.06108	-0.075532	-0.1054
	-0.053113	-0.058802	0.21758
	0.0056735	0.17023	0.088345
	-0.029212	0.084304	-0.048693
	0.01022	-0.14213	0.20011
	0.052027	-0.002599	0.068005
	0.0073232	0.1678	-0.13416
	3.51E-02	1.06E-01	1.59E-01
	0.038105	0.025015	-0.011916
	-0.002535	-0.1522	-0.017875
	0.079107	-0.074883	0.11649
	0.075526	0.16244	-0.10252
	-0.024987	0.07602	-0.043967
	0.012795	0.012832	0.16087
	0.01018	0.11127	-0.050542
	-0.010985	0.10786	-0.0010273
	0.060195	0.11322	0.25764
	0.0084901	0.13856	-0.10643
	-0.030178	0.01202	0.078278
	0.069289	-0.051817	0.17402
	0.052791	-0.032974	-0.09266
	0.025712	0.065786	0.083415
	0.053556	0.11906	0.10232
	-0.048245	-0.13466	-0.038215
	-0.050377	-0.087877	0.030613
	0.015089	0.21653	0.050953
	-0.064863	0.076507	-0.12656
	-0.026154	-0.20386	0.072731
	0.031466	-0.053928	0.064307
	-0.032793	0.17949	-0.026093
	0.01183	0.01933	0.15635
	-0.0056332	-0.084466	0.066567
	-0.052711	0.051654	0.0026709
	0.06953	0.12361	0.20422
	0.051906	-0.098273	0.064307
	-0.021125	-0.16487	-0.067595
	0.037018	0.16909	0.19107
	0.0041445	0.14197	-0.090811
	-0.018751	-0.17169	-0.051364
	0.011065	-0.015594	0.1206
	-0.06273	0.32227	-0.081771
	-0.073916	0.066436	-0.04294
	-0.01529	-0.18112	-0.00041091
	-0.036133	-0.016893	0.062869
	0.029414	0.11143	0.10006
	0.086349	0.032	0.1054
	0.018187	-0.1163	0.0051364
	0.023297	-0.014294	0.19025
	0.022976	0.15025	0.079716
	0.0053516	0.078294	-0.14978
	0.069731	-0.027776	0.077456
	0.072146	0.060751	0.0043145
	0.017624	-0.027127	-0.15553
	0.027281	-0.017705	-0.042529
	-0.015693	0.16471	0.0094509
	-0.060235	0.11565	-0.16745
	-0.029212	0.022091	0.064718
	-0.068041	-0.006335	0.07006
	-0.062569	0.097948	0.029996
	0.013721	0.082679	0.1808
	0.026999	-0.1038	-0.018902
	0.062931	-0.11793	0.096358
	0.087516	0.091289	0.1432
	0.018791	0.085928	0.0030818
	0.01022	-0.13661	0.058349
	0.012111	-0.024203	0.18676
	-0.03227	0.21003	-0.047049
	-0.017906	0.068385	-0.024244
	-0.017906	-0.11533	0.15183
	-0.014164	0.012183	-0.060404
	0.020722	0.13677	-0.027531
	0.030782	0.015594	0.082182
	0.024666	-0.053928	0.027942
	0.010784	0.10022	-0.016642
	0.012997	0.1293	0.097796
	0.030782	-0.021279	-0.058965
	0.036616	-0.0029238	0.13005
	0.026597	0.084954	0.21059
	0.0034604	-0.012183	-0.10273
	-0.0020119	-0.032649	0.11197
	-0.013962	0.056852	0.084853
	-0.078704	0.10315	-0.046638
	-0.082809	-0.02404	0.066362
	-0.019233	-0.11322	0.086496
	-0.014164	0.040121	-0.071704
	0.0076049	-0.0047106	0.054651
	0.041968	-0.14051	0.091838
	0.014204	0.02534	-0.032256
	0.037622	0.073421	0.10047
	0.035248	-0.087065	0.079305
	-0.029896	-0.0079593	0.02938
	-8.05E-05	0.14619	0.066362
	0.0062368	0.14668	0.021778
	-0.04068	-0.06806	-0.075813
	0.0035007	-0.044832	0.10047
	0.0022935	0.23943	-0.077045
	-0.047239	0.086253	-0.086291
	0.00012071	-0.1189	0.17238
	-0.024706	0.10867	-0.12245
	-0.056171	0.1881	-0.057322
	0.030178	-0.055878	0.15697
	0.016779	-0.082192	0.087524
	0.015129	-0.011046	0.05198
	0.079388	-0.016081	0.19559
	0.0035007	-0.022254	0.049309
	-0.016859	-0.023228	0.016847
	0.045187	0.096974	0.18799
	-0.014405	0.016893	-0.040885
	-0.0077256	-0.1189	0.033695
	0.041123	0.1025	0.094715
	-0.0087315	0.13336	-0.045405
	0.012071	-0.053279	-0.0041091
	0.042652	0.0034111	0.05198
	-0.023579	0.093888	-0.11074
	0.0025752	0.10932	0.025887
	0.032834	0.09941	0.13991
	-0.034483	0.007472	-0.15286
	0.032431	0.05669	0.04972
	0.045911	0.098436	0.058965
	-0.018912	-0.029076	-0.10191
	0.045951	-0.069522	0.10375
	0.0089327	-0.03135	0.1356
	-0.040841	0.078456	-0.055267
	0.019757	0.076832	0.00452
	-0.029896	-0.029076	0.036776
	-0.02889	0.023391	-0.023627
	0.069208	0.089502	0.13334
	-0.0088522	-0.043857	-0.0063691
	-0.0029373	-0.084466	0.0086291
	0.080555	0.14327	0.098207
	0.0072025	0.12134	0.0080127
	0.034886	-0.058152	0.098207
	0.054441	0.10266	0.16416
	-0.023539	0.24349	0.069649
	0.033437	0.010721	0.056911
	0.068645	-0.095999	0.13889
	0.0020521	0.10737	-0.015409
	0.06269	0.1868	-0.00226
	0.048888	0.0035736	0.056089
	-0.036254	-0.1535	0.0028764
	0.037381	0.13401	0.03164
	-0.015652	0.21458	-0.042529
	-0.082809	-0.16877	-0.01582
	-0.0022533	-0.15074	0.13786
	-0.012313	0.057502	0.095947
	0.0068001	0.023391	0.056295
	0.033558	-0.083817	0.22662
	-0.063857	-0.0056852	0.076224
	-0.02197	0.09405	-0.00452
	0.063857	0.028101	0.15491
	0.0035811	0.021117	-0.057322
	0.020722	0.088365	-0.07684
	0.048245	0.027939	0.036982
	-0.0047882	-0.082679	-0.12759
	0.012795	0.031675	-0.086085
	-0.023177	0.12443	-0.047049
	-0.10305	0.035411	-0.070471
	-0.047319	-0.02404	0.069238
	-0.055085	-0.034436	0.037804
	-0.07126	0.014294	-0.0076018
	0.040439	0.093563	0.12964
	0.034322	0.014294	0.1508
	0.028005	-0.11046	-0.030613
	0.075727	-0.0092588	0.065129
	-0.0042652	0.11923	0.143
	-0.055568	0.087228	-0.024449
	-0.023418	-0.055066	0.049309
	-0.032069	-0.056527	0.026709
	-0.0095363	0.12556	-0.047871
	0.0095363	0.012183	0.064102
	-0.044824	-0.14554	0.074375
	-0.029172	0.024365	0.054445
	0.01694	0.089664	0.086496
	0.023458	-0.014294	-0.029996
	0.034644	0.04938	0.0088345
	0.033115	0.12361	0.13272
	0.028086	-0.012508	-0.041913
	0.048687	-0.13986	-0.01582
	0.051423	0.0022741	0.15923
	0.011347	0.17023	-0.039447
	-0.044301	-0.0086091	-0.10108
	-0.073715	-0.14944	0.11464
	-0.049935	0.10331	-0.044173
	-0.03561	0.19996	-0.032873
	0.0035007	-0.089664	0.15142
	0.044503	-0.048731	-0.091633
	0.035489	0.10834	0.0071909
	0.052872	0.026639	0.11505
	0.039634	0.042071	-0.10519
	0.014848	0.031837	0.11156
	0.042732	0.074883	0.15841
	0.0096167	0.079593	-0.11547
	-0.022654	-0.021604	0.026093
	0.007967	0.057502	0.099029
	-0.0204	0.088202	-0.058144
	-0.0092144	-0.10623	0.049925
	0.026034	-0.040446	0.16703
	-0.032512	0.16487	-0.018491
	-0.024183	0.062213	0.061431
	0.027925	-0.032974	0.23935
	0.025913	-0.047269	-0.016231
	0.069168	0.089339	0.15368
	0.075365	0.11712	0.1621
	0.034805	-0.09941	-0.079305
	0.083613	0.012995	0.1545
	0.085384	0.21084	-0.011505
	0.012313	0.15561	-0.14546
	0.016336	0.027776	0.12964
	0.0043054	0.055553	-0.0088345
	-0.02535	0.13076	-0.11978
	0.053878	0.10802	0.10067
	0.037018	0.058477	-0.0082182
	-0.048848	-0.018842	0.12142
	-0.0063977	0.054091	0.22867
	-0.033638	0.071147	-0.0014382
	-0.06277	-0.081705	0.12348
	-0.0047078	-0.049543	0.14895
	-0.03384	-0.00097461	-0.053213
	3.70E-03	-1.32E-01	2.36E-02
	0.070576	-0.12183	0.1356
	-0.023096	-0.032	-0.16703
	-0.031948	-0.058152	0.012327
	0.013882	0.03135	0.08362
	-0.06096	0.015269	-0.25743
	-0.061402	0.016406	0.097385
	-0.020682	0.091776	0.12533
	-0.031224	0.012345	-0.18327
	0.030943	0.072284	0.13026
	0.052872	0.034436	0.20011
	-0.0039433	-0.061076	-0.18922
	0.036616	0.040446	0.13005
	0.010421	0.1444	0.093687
	-0.057781	0.035086	-0.086496
	0.013238	-0.076507	0.20689
	-0.011226	0.068548	-0.10047
	-0.050699	0.15854	-0.043762
	0.011669	0.02469	0.11526
	-0.034162	-0.077644	-0.0092455
	-0.039071	0.072609	-0.0043145
	0.018912	0.16926	0.071704
	-0.020722	-0.04467	0.050336
	0.0063575	-0.10575	0.016231
	0.067438	0.077969	0.13108
	0.04571	0.0099085	0.024655
	0.08136	-0.13953	0.040885
	0.093914	0.0089339	0.12964
	0.0044261	0.067411	0.02034
	0.0078061	-0.081218	-0.031229
	0.0020119	0.076507	0.06328
	-0.060235	0.24901	-0.10684
	-0.031868	0.019655	-0.0047255
	-0.031747	-0.13888	-0.0032873
	-0.033317	0.073096	-0.16025
	0.02708	0.14798	0.13765
	-0.0078463	-0.072933	-0.047049
	-0.042169	-0.15821	0.010273
	0.027683	0.12183	0.1882
	0.0076049	0.18355	0.10725
	-0.020119	-0.11484	0.095331
	0.038386	0.044345	0.12266
	0.038386	0.19801	0.066362
	0.057338	-0.015106	-0.090811
	0.056413	-0.069035	0.044789
	0.0022131	0.13823	-0.041091
	0.021286	0.14359	-0.10006
	-0.0086108	-0.083817	0.041296
	-0.059471	-0.029076	0.029585
	0.002535	0.11728	-0.023011
	0.045508	0.030538	0.13868
	0.04402	-0.040121	0.043351
	0.073755	0.087553	0.066978
	0.095805	-0.023391	0.25846
	0.082768	0.018193	0.052391
	0.042893	0.28329	0.033695
	0.013842	0.029563	0.065129
	0.016377	-0.16276	0.11793
	0.019475	0.16909	-0.012533
	0.0010864	0.26964	-0.00041091
	-0.024625	-0.20662	0.036365
	-0.033397	-0.23781	0.036982
	-0.029776	0.31594	0.10067
	-0.043376	0.24755	-0.074991
	-0.033115	-0.31967	0.11793
	0.016377	-0.13011	0.053418
	0.023458	0.38188	-0.059376
	0.048768	-0.013645	0.091838
	0.074801	-0.35476	0.0113
	0.027724	0.10233	-0.020751
	0.03219	0.24771	0.10375
	0.0067599	-0.098761	-0.032051
	-0.079509	-0.090639	-0.098618
	-0.058586	0.17884	0.17505
	-0.053395	0.090151	-0.059376
	-0.07126	-0.25129	-0.11012
	0.0031788	-0.089664	0.087729
	0.0056735	0.32617	-0.0043145
	-0.020682	0.017381	0.0092455
	0.0058344	-0.24008	0.077662
	-0.064179	0.14457	0.0094509
	-0.08651	0.15578	0.10519
	0.012795	-0.13677	0.1958
	0.012152	-0.090476	-0.035955
	0.033196	0.10704	0.075813
	0.10027	0.061888	0.059171
	0.0076853	-0.10575	-0.12163
	-0.017986	0.013482	0.028558
	0.023579	0.21344	0.084647
	-0.043295	0.024853	-0.10766
	-0.004064	-0.13385	0.0036982
	0.030259	0.1332	0.088962
	-0.03392	0.10818	-0.029996
	0.037059	-0.16	0.14361
	0.060598	-0.088527	0.02486
	-0.033236	0.099573	0.081155
	-0.031546	0.078943	0.14711
	-0.061805	-0.0307	-0.038009
	-0.11037	-0.044182	0.0028764
	0.0023338	0.13628	0.069444
	0.06273	0.17657	-0.059993
	0.031104	-0.10282	-0.13211
	0.077618	-0.037685	0.065129
	0.029333	0.12962	-0.14998
	-0.02036	0.10526	-0.12861
	0.021406	0.075532	0.087113
	-0.06446	0.0051979	0.020135
	-0.067398	0.042883	0.13889
	0.029655	0.048568	0.10663
	-0.015009	-0.096324	-0.0092455
	0.026557	-0.072933	0.1393
	0.084297	0.035573	0.13622
	-0.0053516	-0.13937	0.00452
	0.0099789	-0.098923	0.16231
	0.0009657	0.12849	0.092249
	-0.068323	0.077806	-0.020135
	-0.002374	0.024203	0.10725
	0.015652	0.012345	0.12019
	0.0010462	0.08804	-0.026298
	0.085826	0.13774	0.029585
	0.072588	0.067573	0.10149
	0.020803	0.094212	-0.070882
	0.073433	0.1371	0.058349
	0.035047	0.10298	-0.0073964
	0.024022	0.061076	-0.021778
	0.096167	0.085766	0.20176
	0.033759	0.067735	-0.034927
	0.021527	-0.046294	-0.066362
	0.052751	-0.075045	0.061431
	-0.055487	0.14229	0.03842
	-0.059672	0.081705	0.057322
	-0.016819	-0.20905	0.034722
	-0.055206	-0.03736	0.016847
	0.034564	0.2391	-0.04746
	0.066673	0.073746	0.05876
	0.0080072	-0.24674	0.075607
	0.077578	0.029563	0.015615
	0.070778	0.32731	0.12409
	0.023177	0.049543	0.00020545
	0.0542	-0.093238	0.10334
	-0.018067	0.11322	0.096358
	-0.029172	0.21214	-0.10088
	0.053113	-0.03671	0.11937
	0.0079268	-0.14051	-0.020751
	-0.014928	0.036223	-0.038009
	-0.0032995	0.029076	0.080127
	-0.070013	0.0077969	-0.15635
	-0.086148	0.065786	0.033695
	-0.061684	-0.02534	0.13991
	-0.054079	-0.10493	0.053418
	0.02378	-0.031512	0.10519
	0.074399	0.10006	0.058965
	0.038547	0.030375	0.037598
	0.07287	-0.094537	0.056705
	0.087999	0.035573	0.1317
	0.03223	0.15009	0.028558
	0.0092144	0.11322	-0.096769
	-0.016457	-0.039472	0.042324
	-0.0047882	-0.091776	-0.023011
	0.019716	0.12313	-0.10191
	-0.02032	0.10071	-0.00452
	-0.06957	-0.080081	-0.11752
	-0.092707	-0.049055	0.025271
	-0.079187	0.037847	0.17032
	-0.053516	0.097136	-0.040269
	-0.046434	0.0077969	0.044995
	-0.0082889	-0.063675	0.1356
	0.033115	0.026802	0.0063691
	0.051423	-0.053604	0.083415
	0.077336	-0.0934	0.13991
	0.03392	0.14116	-0.031024
	-0.011951	0.038822	0.039653
	0.011065	-0.15578	0.04746
	-0.019274	0.024853	-0.087729
	-0.03227	0.17949	0.052596
	0.013278	0.10802	0.013971
	-0.010904	-0.14213	-0.090195
	-0.0062368	-0.083329	0.040269
	0.021929	0.18729	0.090195
	-0.029574	0.089014	-0.010067
	-0.020923	-0.10607	0.10252
	0.0075646	0.049543	0.12225
	-0.031546	0.16617	0.0084236
	-0.014405	-0.049218	0.18696
	-0.022171	-0.084629	0.0049309
	-0.075928	-0.0086091	-0.059993
	-0.0082487	-0.086415	0.18511
	0.011629	-0.095999	-0.050131
	-0.024062	0.063025	-0.040269
	0.030862	0.15496	0.08136
	0.0060758	0.082842	-0.075813
	-0.020682	-0.078294	0.0026709
	7.40E-02	0	0.16827
	0.084981	0.24057	-0.0053418
	0.042491	0.038335	-0.095125
	0.066593	-0.079756	0.099029
	0.014083	0.1215	-0.089784
	-0.0085303	0.16081	0.066567
	0.045066	0.079106	0.17197
	-0.0082889	-0.03801	-0.12964
	-0.010462	0.00064974	0.11156
	0.039352	0.15171	0.081155
	-0.018549	0.0082842	-0.0113
	0.015009	-0.054903	0.12759
	0.084861	0.14327	0.10663
	0.0085706	0.035411	0.0030818
	0.0078463	-0.056527	0.030407
	0.021447	0.042558	0.02938
	-0.048003	0.074883	-0.11731
	0.028931	-0.010558	0.061636
	0.061442	-0.14197	0.051158
	-0.021004	-0.070984	0.071087
	0.017302	0.1522	0.17053
	0.008128	0.1319	-0.07232
	-0.018509	-0.024203	-0.044378
	0.053757	0.095999	0.24963
	0.019998	0.14587	0.025887
	-0.0050297	-0.001137	-0.054856
	0.059109	-0.0014619	0.1695
	0.0082889	0.17023	-0.053213
	-0.011508	0.024365	0.057116
	0.030782	-0.1293	0.081155
	-0.038065	0.13953	-0.062253
	-0.023861	0.18014	0.08814
	0.008128	-0.098273	0.12512
	-0.047359	-0.19557	0.0057527
	0.04064	0.055715	0.073758
	0.083493	0.19476	0.11896
	-0.0024142	-0.10932	-0.032051
	0.03219	-0.15009	0.14423
	0.023378	0.22449	0.095947
	-0.023177	0.14977	-0.082387
	0.048768	-0.079268	-0.062253
	0.026114	-0.019655	-0.01582
	-0.0012071	0.099248	-0.033489
	0.056493	0.0614	0.00061636
	0.0022131	-0.090476	-0.032051
	-0.027522	-0.01267	-0.076429
	0.00088522	0.1371	0.093482
	-0.06096	0.08674	-0.045405
	-0.068766	-0.011208	0.064513
	-0.018147	0.037847	0.15635
	-0.038829	-0.0086091	-0.01808
	-0.0021728	-0.073421	0.083415
	0.0406	0.023228	0.18142
	-0.024223	0.043208	0.01808
	-0.016739	-0.10948	-0.020956
	0.0018509	-0.052629	0.12677
	-0.041605	0.15561	-0.041091
	-0.020642	0.025502	0.027325
	-0.0065989	-0.055715	0.019313
	-0.0046675	0.0064974	-0.099029
	0.031466	0.02469	0.067184
	0.020561	0.022903	0.037804
	0.0060758	-0.0027614	-0.078895
	0.012795	0.065136	0.058349
	-0.007122	0.029563	0.081976
	-0.026758	-0.041583	-0.10047
	-0.025148	0.0087715	0.10725
	-0.0053516	-0.032974	0.10006
	0.0086108	-0.091776	-0.00678
	0.018952	-0.030375	0.056705
	-0.0042249	-0.036548	0.014793
	-0.045106	0.0084466	-0.010067
	-0.036254	0.15902	0.053007
	-0.011065	0.070659	0.062664
	-0.0098984	-0.052954	-0.073347
	0.014968	0.061563	0.095536
	0.017946	0.18388	0.041913
	-0.0026557	0.048406	-0.046638
	0.052872	-0.21328	0.087318
	0.04571	-0.0016244	-0.016642
	-0.0017302	0.31789	0.0226
	0.026436	-0.033787	0.11053
	0.0072025	-0.20581	-0.089578
	-0.010059	0.12183	-0.011505
	0.052067	0.18014	0.16375
	0.027442	0.020467	-0.1432
	-0.016658	-0.095025	0.097591
	0.022855	0.048243	0.21922
	-0.017986	0.19443	-0.14505
	-0.012272	0.032649	0.059171
	0.051504	0.059939	0.12533
	0.014405	0.11695	0.023216
	0.043456	-0.10721	0.1093
	0.092264	-0.032974	0.11567
	0.034041	0.15269	-0.0030818
	0.04921	0.0069847	0.11773
	0.067679	-0.059939	0.113
	-0.014928	0.10298	-0.074375
	-0.005593	0.15886	0.13272
	0.014284	0.065136	0.10745
	-0.018348	-0.035086	-0.094509
	0.029253	0.05604	0.12964
	0.020602	0.14489	0.10396
	-0.049532	-0.10168	-0.1395
	0.00048285	-0.078781	0.14505
	0.019435	0.18014	0.057322
	-0.0037823	0.13742	-0.032462
	0.052188	-0.066598	0.11773
	0.022131	-0.076832	-0.086085
	0.0043054	0.090151	0.072731
	0.068001	0.092588	0.14772
	0.0069208	-0.032162	-0.00020545
	-0.039071	-0.11939	0.0049309
	-0.0026154	0.078294	-0.0014382
	-0.069329	0.1639	-0.08136
	-0.065386	-0.059126	0.055678
	-0.0034202	-0.092101	0.128
	-0.066392	0.012508	-0.11855
	-0.0085303	0.035086	-0.022395
	0.051142	-0.060426	0.14628
	-0.027361	-0.099085	-0.0020545
	0.01525	0.0947	0.087935
	0.042933	0.20743	0.12266
	-0.010663	-0.031675	-0.093071
	0.036012	-0.031675	0.18327
	0.0063977	0.16601	0.065129
	-0.053194	0.04337	-0.12512
	0.046273	-0.070659	0.16847
	0.0051504	0.076182	-0.021778
	-0.070295	0.098273	-0.028558
	-0.0079268	-0.10071	0.10807
	-0.054803	0.0043857	-0.095742
	-0.048124	0.16357	-0.069238
	0.052872	0.01202	0.090195
	0.0067599	-0.20759	0.034927
	-0.018107	-0.080405	0.038625
	-0.0018509	0.19541	0.13334
	-0.062529	-0.053279	0.030407
	-0.0040237	-0.17884	0.055678
	0.020964	0.1306	0.15779
	-0.045187	0.11403	-0.085675
	0.024867	-0.086253	-0.057938
	0.046112	0.0050355	0.074169
	0.01694	0.067735	-0.16786
	0.06611	-0.082192	-0.02486
	0.010019	-0.086091	0.0092455
	-0.04744	0.12572	-0.19189
	-0.0095363	0.18631	0.0452
	-0.03553	-0.07001	0.061636
	-0.014646	-0.038172	-0.010478
	0.042169	0.22075	0.059582
	-0.00080475	0.07001	0.070265
	0.0096167	-0.11614	0.099645
	0.061282	0.085278	0.0678
	-0.0015693	0.22514	0.086496
	-0.0097777	0.026477	0.0018491
	0.026235	-0.071147	0.052596
	0.0068001	0.147	0.13539
	0.05082	0.17852	-0.067184
	0.041002	-0.1267	0.074169
	0.0049492	-0.11484	0.10519
	0.04241	0.128	-0.022395
	0.035449	0.051005	0.21963
	0.0073232	-0.14181	0.061431
	0.019153	0.073421	0.017669
	0.035892	0.22059	0.13396
	0.058143	-0.052629	-0.074169
	0.076451	-0.093238	0.031024
	0.070858	0.033462	0.011711
	0.051584	0.08674	-0.014793
	0.008651	-0.011858	0.066362
	-0.011709	0.029401	-0.012738
	-0.036978	0.26022	0.026093
	-0.05939	0.067086	0.013765
	-0.027643	-0.10282	0.087935
	-0.015451	0.13385	0.032051
	-0.003219	0.10802	-0.017053
	0.027563	-0.19768	0.1243
	0.0098179	-0.11403	-0.059376
	0.00012071	0.115	0.050336
	0.036012	0.087228	0.19826
	0.0045468	-0.054091	-0.085675
	-0.017664	-0.065624	0.042529
	0.01348	0.1574	0.10293
	-0.023096	0.15285	-0.12163
	-0.0022935	-0.10769	0.033695
	0.032914	-0.081705	0.074169
	-0.04414	0.1306	-0.062047
	-0.038668	0.044507	0.12183
	-0.022372	-0.076832	0.085058
	-0.08977	-0.019492	-0.018491
	-0.031948	-0.019492	0.21449
	0.02881	-0.001137	0.0904
	0.014606	-0.11484	0.044378
	0.07456	-0.12443	0.15389
	0.058908	0.15155	0.0014382
	-0.0078865	0.10558	-0.012122
	0.026999	0.031837	-0.00226
	-0.008812	0.12605	-0.094509
	-0.042048	0.073421	-0.18203
	0.038024	0.13482	0.042529
	0.0060758	0.071147	-0.020751
	-0.038628	0.0016244	-0.12759
	0.0071623	0.1267	0.1582
	-0.029856	0.066923	0.042735
	-0.060678	-0.081867	0.095947
	-0.010019	0.0038984	0.17936
	-0.042853	0.027939	0.016025
	-0.010341	-0.16114	0.093482
	0.085504	-0.023878	0.12348
	0.0037018	0.083817	-0.18409
	0.0009657	-0.1345	-0.030613
	0.016175	-0.24235	0.11731
	-0.092023	-0.026802	-0.21614
	-0.048164	0.13352	0.070676
	-0.024464	0.027614	0.039653
	-0.082728	-0.10168	-0.10006
	0.032069	0.075695	0.10437
	0.083533	0.2391	0.077867
	0.047359	-0.0060101	0.09492
	0.11291	0.051492	0.12286
	0.059189	0.15496	0.070265
	0.015491	0.11452	-0.062664
	0.078141	0.15545	0.055678
	0.0035007	0.11468	-0.014176
	-0.030621	0.044832	-0.055267
	0.012876	0.012832	0.061225
	-0.056332	0.053279	-0.041502
	-0.045871	0.0073096	-0.021367
	-0.0056735	0.056527	0.068827
	-0.064822	0.0082842	0.073347
	0.0060758	-0.053279	0.10807
	0.067559	0.013807	0.10601
	0.031425	0.021117	0.10293
	0.11721	0.035086	0.21901
	0.16163	-0.12459	0.019107
	0.097254	-0.13515	0.083825
	0.075727	0.18014	0.15512
	0.0080072	0.14977	0.035749
	-0.043014	-0.20434	-0.046638
	-0.0092546	0.074395	-0.074169
	-0.055769	0.37945	0.0113
	-0.070576	0.016406	-0.21532
	-0.00028166	-0.23001	0.047871
	-0.014566	0.060751	-0.069238
	-0.007122	0.352	-0.11814
	0.013439	-0.05734	0.18368
	-0.054361	-0.25389	0.029175
	-0.031466	0.2084	0.21449
	0.020964	0.24495	0.1619
	0.0023338	-0.21165	0.038215
	0.036012	-0.23098	0.10807
	0.037059	0.17624	0.13231
	0.0033397	0.1241	-0.10622
	0.026476	-0.26737	-0.073347
	-0.0136	-0.14229	0.057527
	-0.055206	0.23959	-0.060815
	0.0073232	0.11273	-0.0063691
	0.0012474	-0.11663	-0.04972
	-0.02378	0.0307	0.010684
	0.045991	0.15837	0.06554
	0.07798	-0.039634	0.12327
	0.076692	-0.045482	-0.010067
	0.051343	0.243	0.12183
	-0.015532	0.10818	0.10047
	-0.029132	-0.11435	-0.087113
	-0.0041042	0.065136	0.084442
	0.0021728	0.20727	-0.00020545
	-0.0070013	-0.030538	0.0226
	-0.022935	-0.28345	0.053829
	-0.048888	0.039472	0.019313
	-0.074801	0.2612	-0.063896
	-0.04064	-0.11777	0.16087
	-0.0048285	-0.17137	0.022189
	-0.024183	0.12459	-0.063691
	0.010341	0.010071	0.22867
	0.043738	-0.15188	-0.13375
	0.025671	-0.099735	-0.0049309
	0.079187	0.047269	0.16231
	0.080958	0.10656	-0.083825
	-0.012313	-0.046132	-0.10334
	-0.02539	0.14229	0.071909
	-0.055849	0.21864	0.028558
	-0.054441	-0.0073096	-0.094304
	0.025269	0.014294	0.00041091
	-0.014445	0.16016	-0.048693
	-0.043778	0.16763	0.0018491
	0.0010462	-0.048243	0.075196
	-0.03895	-0.081705	0.025271
	-0.052751	0.057989	0.11238
	-0.0011266	0.00048731	0.18902
	-0.029212	-0.12053	-0.019929
	0.015572	-0.085928	0.27223
	0.08981	0.020954	0.22292
	0.054602	0.079593	-0.15964
	0.086591	0.040446	0.20319
	0.086913	0.033949	0.086907
	-0.0057942	0.064324	-0.098824
	0.0014083	0.044507	-0.050747
	0.017785	0.19281	-0.051775
	-0.021768	0.11842	-0.078689
	0.023056	-0.17039	0.0012327
	0.023579	-0.050192	0.11218
	-0.031506	0.087877	-0.00082182
	0.0087315	0.12231	0.16457
	-0.037622	0.040771	0.052185
	-0.089407	-0.22059	0.062869
	0.014888	0.066598	0.25743
	0.0073634	0.38773	-0.11629
	-0.00044261	-0.046294	-0.1091
	0.088764	-0.31269	0.18306
	0.050015	0.11777	-0.11629
	0.029172	0.3213	-0.15943
	0.029494	-0.074883	0.02938
	-0.075727	-0.21783	-0.086907
	-0.070697	0.24463	0.071087
	0.014566	0.23992	0.13231
	-0.0063575	-0.27127	0.063485
	0.040237	-0.086091	0.10869
	0.067599	0.28605	0.10745
	0.012313	-0.031675	0.037804
	0.057741	-0.26526	0.1393
	0.011307	0.19281	0.11793
	-0.063897	0.19232	-0.069855
	-0.0013278	-0.25778	0.15286
	-0.017181	-0.02404	0.044995
	-0.04237	0.24398	-0.044584
	0.029977	-0.058639	0.061225
	0.0101	-0.20109	-0.029585
	0.014727	0.18778	0.03842
	0.073272	0.32016	0.0678
	0.014123	-0.078781	0.0049309
	0.028931	-0.085603	-0.027736
	0.092868	0.38627	0.086907
	0.039151	0.14619	-0.0041091
	0.04917	-0.31919	0.025887
	0.058948	-0.016731	0.09944
	-0.050498	0.24528	-0.087113
	-0.037783	-0.012345	0.018902
	-0.04241	-0.20646	0.057733
	-0.13077	0.082679	-0.031024
	-0.035409	0.19801	-0.019518
	0.022131	-0.10558	-0.032667
	-0.0049492	-0.13498	-0.062664
	0.065909	0.12491	0.1093
	0.052993	0.085278	0.067184
	0.029615	-0.094537	-0.05424
	0.081883	0.084791	0.14382
	0.0092546	0.2097	0.057322
	-0.012152	-0.026964	0.10232
	0.044503	-0.09941	0.13375
	-0.003219	0.086253	-0.055884
	0.0075244	0.050192	0.034516
	0.02547	-0.063837	0.077662
	-0.036334	0.0032487	-0.064924
	-0.035288	0.10103	-0.045405
	-0.0474	0.03736	0.058349
	-0.090051	-0.05068	-0.023011
	-0.018187	0.064974	0.024038
	0.026476	0.097136	0.12101
	0.0085706	-0.045319	0.093893
	0.061684	-0.033137	0.019518
	0.05428	0.020792	0.095947
	0.020119	0.035573	0.092455
	0.040237	0.056527	0.026709
	0.0099386	-0.034599	0.093276
	-0.0027361	-0.0095837	-0.11505
	0.018308	0.061563	-0.028969
	0.00052309	0.024528	0.04972
	-0.0057137	0.037847	-0.094098
	-0.018912	0.0068223	0.055678
	-0.057459	-0.034761	0.048076
	-0.068041	0.10688	-0.089989
	-0.045066	0.11224	0.093276
	-0.0017704	-0.019005	0.13478
	0.014204	-0.011695	-0.039447
	0.019435	-0.041259	0.044995
	0.046353	0.011695	0.069649
	0.031144	0.061725	0.15779
	0.013922	-0.059939	-0.0010273
	0.016699	-0.060588	0.021984
	-0.021809	0.04938	0.11464
	-0.022452	0.069522	0.0039036
	0.010864	0.017705	0.10355
	-0.016377	0.020792	-0.11012
	-0.0018509	-0.028913	0.044789
	0.036777	0.00097461	-0.04068
	-0.01863	0.039634	-0.093893
	-0.0078061	-0.027939	0.19518
	0.017865	0.076832	-0.023422
	-0.029333	0.028264	0.00226
	0.018348	0.078456	0.14937
	0.024947	0.17494	0.038215
	-0.036294	-0.016731	0.044995
	-0.010019	-0.128	0.13313
	-0.0089729	0.016893	-0.032667
	-0.02209	0.083979	0.0452
	0.031184	-0.038497	0.080538
	-0.00052309	0.033462	0.023422
	-0.030822	0.040121	0.012944
	0.031828	0.055553	0.050542
	0.017785	0.0073096	0.021573
	0.045951	-0.086578	-0.047255
	0.10908	0.066598	0.1695
	0.034121	0.14327	-0.11033
	0.0052309	0.026152	0.033284
	0.043336	0.093563	0.093893
	0.0045066	0.1613	-0.078689
	0.02712	0.036223	0.1469
	0.045388	0.080081	-0.059787
	-0.042088	0.0087715	-0.077662
	0.010824	-0.0048731	0.058349
	0.07464	0.072121	0.10951
	-0.00084499	0.0043857	0.0049309
	0.020561	0.0066598	0.068827
	0.00060356	0.057664	0.016231
	-0.074721	0.032974	-0.02712
	0.019153	0.015756	0.12471
	0.026275	-0.0021117	-0.0061636
	-0.031868	-0.073258	0.032462
	0.037421	0.015106	0.16005
	-0.0042249	-0.0071471	0.085264
	-0.043819	-0.015431	-0.010067
	0.033437	0.16	0.23381
	-0.0028166	0.067248	-0.0065745
	0.0061161	-0.095674	0.020545
	0.078342	0.030213	0.16683
	0.010824	0.13385	-0.12759
	0.020762	-0.0061725	0.057116
	0.060758	-0.0016244	-0.041913
	-0.033196	0.099898	-0.062664
	-0.028206	0.077157	0.084442
	-0.017503	0.022416	0.029996
	-0.076532	0.010558	-0.039447
	-0.0082487	0.058639	0.10869
	0.026476	-0.060426	0.068622
	-0.00080475	-0.14067	0.011711
	0.05766	0.036873	0.19087
	0.032029	0.11679	0.053418
	-0.02036	-0.084629	0.0082182
	0.024706	-0.044507	-0.0096564
	-0.0026959	0.16633	0.032462
	0.0028971	0.057827	-0.075813
	0.058264	-0.038335	-0.024244
	-0.0087315	-0.060751	-0.083825
	-0.025953	0.024528	-0.10149
	-0.0052309	0.090801	0.15183
	-0.068363	0.0027614	-0.14546
	-0.06438	0.031188	-0.0036982
	-0.034765	0.042883	0.19867
	-0.048727	-0.010233	-0.025887
	0.02708	0.011208	0.0047255
	0.080636	0.0021117	0.19641
	0.035047	-0.052629	-0.028558
	0.043175	0.010558	0.010067
	0.022251	0.048406	0.17094
	-0.025671	0.024528	-0.021984
	-0.0091741	0.065786	0.074169
	-0.013882	0.051979	-0.046227
	-0.0088522	0.0022741	-0.0071909
	0.018831	0.027452	0.059993
	0.014123	0.054091	0.051775
	0.030822	0.035573	-0.071293
	0.054039	0.039634	0.037804
	0.026195	0.064487	0.15121
	0.007122	0.079431	-0.1282
	0.015854	0.014782	0.12574
	0.011508	-0.021604	0.053007
	-0.0062368	0.065461	-0.049515
	-0.004064	-0.013482	0.046433
	0.00088522	-0.14717	0.068211
	-0.036415	0.0076345	0.038215
	-0.046877	0.11419	0.07684
	-0.050337	-0.013969	0.0678
	-0.069128	-0.090639	-0.038831
	-0.0014485	0.0050355	0.21306
	0.045468	0.16065	-0.014998
	0.0441	0.013482	-0.066567
	0.066673	-0.21669	0.14217
	0.020159	0.0084466	0.017258
	0.0052711	0.20012	0.032256
	0.052067	0.031025	0.13704
	-0.011347	-0.015269	-0.10108
	-0.061644	0.031025	0.012122
	0.008128	0.10071	0.18244
	0.0085706	0.11712	-0.23052
	-0.0014888	-0.010558	0.051569
	0.036978	0.019005	0.14937
	-0.013681	0.068548	-0.077867
	0.0006438	0.0627	0.031229
	0.016859	0.091613	0.10273
	-0.062368	0.067086	0.030407
	0.0078865	-0.029076	0.076429
	0.081521	-0.039472	0.17073
	0.012635	-0.027939	-0.043145
	0.017383	-0.069197	0.17649
	0.020682	0.020792	0.13231
	-0.037461	0.03005	-0.068211
	0.0070013	-0.0040609	0.16888
	0.011387	0.062862	0.071498
	-0.029937	0.059126	-0.11156
[truncated: 63,536 more rows]
