# Supplementary material for: Fault Characteristic Extraction by Fractional Lower-Order Bispectrum Methods
Source: Hindawi journal article supplement (doi:10.1155/2020/8823389), 2020-12-31
Supplement: f1 [file 8823389.f1.zip › 8823389.f1/inner race fault signals.txt]

X209RPM	X209_BA_time	X209_DE_time	X209_FE_time
1797	-0.10675	-0.10675	-0.10675
	-0.0018107	-0.0018107	-0.0018107
	0.096047	0.096047	0.096047
	0.053516	0.053516	0.053516
	-0.0018107	-0.0018107	-0.0018107
	0.030983	0.030983	0.030983
	0.029776	0.029776	0.029776
	-0.041847	-0.041847	-0.041847
	-0.009657	-0.009657	-0.009657
	0.071582	0.071582	0.071582
	0.066673	0.066673	0.066673
	-0.019555	-0.019555	-0.019555
	-0.013681	-0.013681	-0.013681
	0.078986	0.078986	0.078986
	0.00048285	0.00048285	0.00048285
	-0.13158	-0.13158	-0.13158
	-0.059672	-0.059672	-0.059672
	0.039634	0.039634	0.039634
	-0.0056735	-0.0056735	-0.0056735
	0.0036214	0.0036214	0.0036214
	0.11629	0.11629	0.11629
	0.16948	0.16948	0.16948
	0.077296	0.077296	0.077296
	-0.085102	-0.085102	-0.085102
	-0.067156	-0.067156	-0.067156
	0.012111	0.012111	0.012111
	-0.10055	-0.10055	-0.10055
	-0.10599	-0.10599	-0.10599
	0.02889	0.02889	0.02889
	-0.016055	-0.016055	-0.016055
	-0.061644	-0.061644	-0.061644
	-0.011629	-0.011629	-0.011629
	-0.0029373	-0.0029373	-0.0029373
	0.0058344	0.0058344	0.0058344
	-0.038829	-0.038829	-0.038829
	-0.044221	-0.044221	-0.044221
	0.1018	0.1018	0.1018
	0.10546	0.10546	0.10546
	-0.023056	-0.023056	-0.023056
	0.036012	0.036012	0.036012
	0.064742	0.064742	0.064742
	0.019113	0.019113	0.019113
	0.1251	0.1251	0.1251
	0.15616	0.15616	0.15616
	0.14405	0.14405	0.14405
	0.14123	0.14123	0.14123
	-0.031023	-0.031023	-0.031023
	-0.11484	-0.11484	-0.11484
	-0.079509	-0.079509	-0.079509
	-0.1865	-0.1865	-0.1865
	-0.22887	-0.22887	-0.22887
	-0.17527	-0.17527	-0.17527
	-0.18384	-0.18384	-0.18384
	-0.099386	-0.099386	-0.099386
	-0.04909	-0.04909	-0.04909
	-0.07118	-0.07118	-0.07118
	0.12848	0.12848	0.12848
	0.27591	0.27591	0.27591
	0.15487	0.15487	0.15487
	0.13339	0.13339	0.13339
	0.20485	0.20485	0.20485
	0.22187	0.22187	0.22187
	0.14131	0.14131	0.14131
	-0.05927	-0.05927	-0.05927
	-0.0013681	-0.0013681	-0.0013681
	0.16602	0.16602	0.16602
	0.011347	0.011347	0.011347
	-0.097374	-0.097374	-0.097374
	-0.0051101	-0.0051101	-0.0051101
	-0.01863	-0.01863	-0.01863
	-0.082728	-0.082728	-0.082728
	-0.10506	-0.10506	-0.10506
	-0.13439	-0.13439	-0.13439
	-0.076572	-0.076572	-0.076572
	-0.063897	-0.063897	-0.063897
	-0.099588	-0.099588	-0.099588
	0.0043859	0.0043859	0.0043859
	-0.02708	-0.02708	-0.02708
	-0.069088	-0.069088	-0.069088
	0.062207	0.062207	0.062207
	-0.012152	-0.012152	-0.012152
	-0.090856	-0.090856	-0.090856
	0.04233	0.04233	0.04233
	0.10824	0.10824	0.10824
	0.11661	0.11661	0.11661
	0.07963	0.07963	0.07963
	0.078745	0.078745	0.078745
	0.2096	0.2096	0.2096
	0.16188	0.16188	0.16188
	-0.00092546	-0.00092546	-0.00092546
	0.02539	0.02539	0.02539
	0.071864	0.071864	0.071864
	-0.0092948	-0.0092948	-0.0092948
	-0.087677	-0.087677	-0.087677
	-0.11709	-0.11709	-0.11709
	-0.093834	-0.093834	-0.093834
	-0.081682	-0.081682	-0.081682
	-0.13077	-0.13077	-0.13077
	-0.095926	-0.095926	-0.095926
	-0.034322	-0.034322	-0.034322
	-0.038065	-0.038065	-0.038065
	-0.049009	-0.049009	-0.049009
	-0.044664	-0.044664	-0.044664
	0.0012071	0.0012071	0.0012071
	0.039513	0.039513	0.039513
	0.057379	0.057379	0.057379
	0.097415	0.097415	0.097415
	0.089247	0.089247	0.089247
	0.053475	0.053475	0.053475
	0.07629	0.07629	0.07629
	0.094397	0.094397	0.094397
	0.10075	0.10075	0.10075
	0.076089	0.076089	0.076089
	-0.0057942	-0.0057942	-0.0057942
	0.0092546	0.0092546	0.0092546
	0.0577	0.0577	0.0577
	0.025269	0.025269	0.025269
	0.043456	0.043456	0.043456
	0.050941	0.050941	0.050941
	-0.018107	-0.018107	-0.018107
	-0.073675	-0.073675	-0.073675
	-0.13685	-0.13685	-0.13685
	-0.18916	-0.18916	-0.18916
	-0.15894	-0.15894	-0.15894
	-0.15073	-0.15073	-0.15073
	-0.18666	-0.18666	-0.18666
	-0.11452	-0.11452	-0.11452
	-0.042249	-0.042249	-0.042249
	-0.030741	-0.030741	-0.030741
	0.039151	0.039151	0.039151
	0.084177	0.084177	0.084177
	0.14461	0.14461	0.14461
	0.21845	0.21845	0.21845
	0.14156	0.14156	0.14156
	0.11347	0.11347	0.11347
	0.20163	0.20163	0.20163
	0.14127	0.14127	0.14127
	0.029333	0.029333	0.029333
	0.036053	0.036053	0.036053
	0.025148	0.025148	0.025148
	0.058183	0.058183	0.058183
	0.048888	0.048888	0.048888
	-0.088884	-0.088884	-0.088884
	-0.064259	-0.064259	-0.064259
	-0.019757	-0.019757	-0.019757
	-0.11266	-0.11266	-0.11266
	-0.1325	-0.1325	-0.1325
	-0.11737	-0.11737	-0.11737
	-0.10574	-0.10574	-0.10574
	-0.0035811	-0.0035811	-0.0035811
	-0.036093	-0.036093	-0.036093
	-0.12562	-0.12562	-0.12562
	0.0034202	0.0034202	0.0034202
	0.083935	0.083935	0.083935
	0.048727	0.048727	0.048727
	0.08305	0.08305	0.08305
	0.098622	0.098622	0.098622
	0.12675	0.12675	0.12675
	0.14083	0.14083	0.14083
	0.021366	0.021366	0.021366
	0.044744	0.044744	0.044744
	0.13403	0.13403	0.13403
	0.0078061	0.0078061	0.0078061
	-0.020239	-0.020239	-0.020239
	0.036817	0.036817	0.036817
	-0.029051	-0.029051	-0.029051
	-0.041082	-0.041082	-0.041082
	-0.11588	-0.11588	-0.11588
	-0.20344	-0.20344	-0.20344
	-0.14912	-0.14912	-0.14912
	-0.14727	-0.14727	-0.14727
	-0.098823	-0.098823	-0.098823
	0.012997	0.012997	0.012997
	-0.0032592	-0.0032592	-0.0032592
	0.044744	0.044744	0.044744
	0.15592	0.15592	0.15592
	0.07114	0.07114	0.07114
	0.032673	0.032673	0.032673
	0.12091	0.12091	0.12091
	0.13029	0.13029	0.13029
	0.15133	0.15133	0.15133
	0.10377	0.10377	0.10377
	0.014727	0.014727	0.014727
	0.030661	0.030661	0.030661
	-0.060074	-0.060074	-0.060074
	-0.15302	-0.15302	-0.15302
	-0.088321	-0.088321	-0.088321
	-0.099225	-0.099225	-0.099225
	-0.094035	-0.094035	-0.094035
	0.0036214	0.0036214	0.0036214
	0.04414	0.04414	0.04414
	0.04237	0.04237	0.04237
	0.017101	0.017101	0.017101
	0.020682	0.020682	0.020682
	0.098823	0.098823	0.098823
	0.13319	0.13319	0.13319
	0.050055	0.050055	0.050055
	0.048768	0.048768	0.048768
	0.12164	0.12164	0.12164
	0.10848	0.10848	0.10848
	0.022412	0.022412	0.022412
	-0.018187	-0.018187	-0.018187
	0.049331	0.049331	0.049331
	0.05259	0.05259	0.05259
	-0.022292	-0.022292	-0.022292
	-0.12015	-0.12015	-0.12015
	-0.15226	-0.15226	-0.15226
	-0.10252	-0.10252	-0.10252
	-0.16787	-0.16787	-0.16787
	-0.24698	-0.24698	-0.24698
	-0.16642	-0.16642	-0.16642
	-0.04921	-0.04921	-0.04921
	0.021849	0.021849	0.021849
	0.065466	0.065466	0.065466
	0.058264	0.058264	0.058264
	0.093753	0.093753	0.093753
	0.15858	0.15858	0.15858
	0.094397	0.094397	0.094397
	0.02708	0.02708	0.02708
	0.054441	0.054441	0.054441
	0.063334	0.063334	0.063334
	0.10011	0.10011	0.10011
	0.1259	0.1259	0.1259
	0.019314	0.019314	0.019314
	-0.041887	-0.041887	-0.041887
	-0.035167	-0.035167	-0.035167
	-0.109	-0.109	-0.109
	-0.10071	-0.10071	-0.10071
	-0.043094	-0.043094	-0.043094
	-0.052832	-0.052832	-0.052832
	-0.0046675	-0.0046675	-0.0046675
	-0.052832	-0.052832	-0.052832
	-0.15507	-0.15507	-0.15507
	-0.098099	-0.098099	-0.098099
	-0.090373	-0.090373	-0.090373
	-0.15065	-0.15065	-0.15065
	-0.073795	-0.073795	-0.073795
	0.029051	0.029051	0.029051
	0.078704	0.078704	0.078704
	0.13033	0.13033	0.13033
	0.054079	0.054079	0.054079
	0.039714	0.039714	0.039714
	0.15922	0.15922	0.15922
	0.10393	0.10393	0.10393
	0.055125	0.055125	0.055125
	0.09327	0.09327	0.09327
	0.051262	0.051262	0.051262
	0.077296	0.077296	0.077296
	0.095161	0.095161	0.095161
	0.00092546	0.00092546	0.00092546
	-0.0050297	-0.0050297	-0.0050297
	-0.015813	-0.015813	-0.015813
	-0.065104	-0.065104	-0.065104
	0.036294	0.036294	0.036294
	0.07633	0.07633	0.07633
	-0.026959	-0.026959	-0.026959
	-0.0078463	-0.0078463	-0.0078463
	-0.017544	-0.017544	-0.017544
	-0.109	-0.109	-0.109
	-0.067357	-0.067357	-0.067357
	-0.061523	-0.061523	-0.061523
	-0.038507	-0.038507	-0.038507
	0.081762	0.081762	0.081762
	0.064863	0.064863	0.064863
	0.09154	0.09154	0.09154
	0.15045	0.15045	0.15045
	0.010421	0.010421	0.010421
	-0.016739	-0.016739	-0.016739
	0.050659	0.050659	0.050659
	-0.00092546	-0.00092546	-0.00092546
	0.039915	0.039915	0.039915
	0.066995	0.066995	0.066995
	0.014968	0.014968	0.014968
	0.087878	0.087878	0.087878
	0.047722	0.047722	0.047722
	-0.038266	-0.038266	-0.038266
	0.066915	0.066915	0.066915
	0.025028	0.025028	0.025028
	-0.034242	-0.034242	-0.034242
	0.036576	0.036576	0.036576
	-0.014968	-0.014968	-0.014968
	-0.0090936	-0.0090936	-0.0090936
	-0.0061966	-0.0061966	-0.0061966
	-0.13419	-0.13419	-0.13419
	-0.12453	-0.12453	-0.12453
	-0.076572	-0.076572	-0.076572
	-0.091419	-0.091419	-0.091419
	-0.0060356	-0.0060356	-0.0060356
	0.021849	0.021849	0.021849
	-0.0081682	-0.0081682	-0.0081682
	0.070094	0.070094	0.070094
	0.065305	0.065305	0.065305
	-0.0055125	-0.0055125	-0.0055125
	0.0056735	0.0056735	0.0056735
	-0.011347	-0.011347	-0.011347
	-0.015813	-0.015813	-0.015813
	0.01698	0.01698	0.01698
	4.02E-05	4.02E-05	4.02E-05
	0.006277	0.006277	0.006277
	-0.012795	-0.012795	-0.012795
	-0.068041	-0.068041	-0.068041
	-0.052631	-0.052631	-0.052631
	-0.030701	-0.030701	-0.030701
	-0.0075244	-0.0075244	-0.0075244
	0.015813	0.015813	0.015813
	-0.017141	-0.017141	-0.017141
	-0.042289	-0.042289	-0.042289
	-0.037823	-0.037823	-0.037823
	-0.028327	-0.028327	-0.028327
	-0.01018	-0.01018	-0.01018
	-0.027965	-0.027965	-0.027965
	-0.036536	-0.036536	-0.036536
	0.020843	0.020843	0.020843
	0.048124	0.048124	0.048124
	0.061442	0.061442	0.061442
	0.083452	0.083452	0.083452
	0.046353	0.046353	0.046353
	0.048124	0.048124	0.048124
	0.075324	0.075324	0.075324
	0.042893	0.042893	0.042893
	0.06265	0.06265	0.06265
	0.061282	0.061282	0.061282
	-0.023056	-0.023056	-0.023056
	-0.0101	-0.0101	-0.0101
	-0.0023338	-0.0023338	-0.0023338
	-0.06277	-0.06277	-0.06277
	-0.016055	-0.016055	-0.016055
	-0.016658	-0.016658	-0.016658
	-0.057218	-0.057218	-0.057218
	0.042571	0.042571	0.042571
	0.068725	0.068725	0.068725
	0.035771	0.035771	0.035771
	0.052268	0.052268	0.052268
	-0.028166	-0.028166	-0.028166
	-0.055487	-0.055487	-0.055487
	0.031627	0.031627	0.031627
	-0.0050699	-0.0050699	-0.0050699
	-0.040801	-0.040801	-0.040801
	-0.027361	-0.027361	-0.027361
	-0.10039	-0.10039	-0.10039
	-0.041686	-0.041686	-0.041686
	0.076813	0.076813	0.076813
	0.060758	0.060758	0.060758
	0.12739	0.12739	0.12739
	0.18014	0.18014	0.18014
	0.082326	0.082326	0.082326
	0.092667	0.092667	0.092667
	0.078664	0.078664	0.078664
	0.044583	0.044583	0.044583
	0.13073	0.13073	0.13073
	0.033357	0.033357	0.033357
	-0.072789	-0.072789	-0.072789
	0.012755	0.012755	0.012755
	-0.0066794	-0.0066794	-0.0066794
	-0.087557	-0.087557	-0.087557
	-0.067076	-0.067076	-0.067076
	-0.11516	-0.11516	-0.11516
	-0.074198	-0.074198	-0.074198
	0.013077	0.013077	0.013077
	-0.11005	-0.11005	-0.11005
	-0.082688	-0.082688	-0.082688
	-0.021648	-0.021648	-0.021648
	-0.16835	-0.16835	-0.16835
	-0.16135	-0.16135	-0.16135
	-0.029132	-0.029132	-0.029132
	0.021567	0.021567	0.021567
	0.094155	0.094155	0.094155
	0.087999	0.087999	0.087999
	0.071099	0.071099	0.071099
	0.16598	0.16598	0.16598
	0.047601	0.047601	0.047601
	-0.041324	-0.041324	-0.041324
	0.11729	0.11729	0.11729
	0.12932	0.12932	0.12932
	0.043336	0.043336	0.043336
	0.007967	0.007967	0.007967
	-0.0026557	-0.0026557	-0.0026557
	0.062167	0.062167	0.062167
	0.016296	0.016296	0.016296
	-0.1216	-0.1216	-0.1216
	-0.053475	-0.053475	-0.053475
	0.011951	0.011951	0.011951
	-0.037823	-0.037823	-0.037823
	0.034202	0.034202	0.034202
	0.022131	0.022131	0.022131
	-0.11283	-0.11283	-0.11283
	-0.11005	-0.11005	-0.11005
	-0.082607	-0.082607	-0.082607
	-0.065426	-0.065426	-0.065426
	-0.022895	-0.022895	-0.022895
	0.014606	0.014606	0.014606
	0.12667	0.12667	0.12667
	0.15254	0.15254	0.15254
	0.024746	0.024746	0.024746
	-0.0076451	-0.0076451	-0.0076451
	0.072025	0.072025	0.072025
	0.051343	0.051343	0.051343
	-0.004909	-0.004909	-0.004909
	0.051665	0.051665	0.051665
	0.068122	0.068122	0.068122
	-0.044784	-0.044784	-0.044784
	-0.14675	-0.14675	-0.14675
	-0.12325	-0.12325	-0.12325
	-0.05259	-0.05259	-0.05259
	-0.046595	-0.046595	-0.046595
	-0.048164	-0.048164	-0.048164
	0.048043	0.048043	0.048043
	0.16445	0.16445	0.16445
	0.13069	0.13069	0.13069
	0.060437	0.060437	0.060437
	0.090574	0.090574	0.090574
	0.07633	0.07633	0.07633
	0.022131	0.022131	0.022131
	0.041243	0.041243	0.041243
	0.078061	0.078061	0.078061
	0.070737	0.070737	0.070737
	0.00028166	0.00028166	0.00028166
	-0.097294	-0.097294	-0.097294
	-0.09999	-0.09999	-0.09999
	-0.059028	-0.059028	-0.059028
	-0.14538	-0.14538	-0.14538
	-0.16421	-0.16421	-0.16421
	-0.046032	-0.046032	-0.046032
	0.0101	0.0101	0.0101
	0.027281	0.027281	0.027281
	-0.014083	-0.014083	-0.014083
	-0.04245	-0.04245	-0.04245
	0.095202	0.095202	0.095202
	0.17447	0.17447	0.17447
	0.064983	0.064983	0.064983
	0.10176	0.10176	0.10176
	0.23153	0.23153	0.23153
	0.19575	0.19575	0.19575
	0.071542	0.071542	0.071542
	-0.088683	-0.088683	-0.088683
	-0.079952	-0.079952	-0.079952
	0.03219	0.03219	0.03219
	-0.081601	-0.081601	-0.081601
	-0.19841	-0.19841	-0.19841
	-0.083573	-0.083573	-0.083573
	-0.012433	-0.012433	-0.012433
	-0.092305	-0.092305	-0.092305
	-0.13129	-0.13129	-0.13129
	-0.16131	-0.16131	-0.16131
	-0.10965	-0.10965	-0.10965
	-0.0016095	-0.0016095	-0.0016095
	-0.016175	-0.016175	-0.016175
	0.04414	0.04414	0.04414
	0.080756	0.080756	0.080756
	0.03388	0.03388	0.03388
	0.11629	0.11629	0.11629
	0.081078	0.081078	0.081078
	-0.062368	-0.062368	-0.062368
	0.016417	0.016417	0.016417
	0.092747	0.092747	0.092747
	0.045026	0.045026	0.045026
	0.072266	0.072266	0.072266
	0.06772	0.06772	0.06772
	0.058545	0.058545	0.058545
	0.056373	0.056373	0.056373
	-0.071623	-0.071623	-0.071623
	-0.068041	-0.068041	-0.068041
	0.082084	0.082084	0.082084
	-0.0093753	-0.0093753	-0.0093753
	-0.10204	-0.10204	-0.10204
	-0.011347	-0.011347	-0.011347
	-0.021487	-0.021487	-0.021487
	-0.035731	-0.035731	-0.035731
	-0.099185	-0.099185	-0.099185
	-0.1624	-0.1624	-0.1624
	-0.0019716	-0.0019716	-0.0019716
	0.04575	0.04575	0.04575
	-0.016135	-0.016135	-0.016135
	0.083332	0.083332	0.083332
	0.098904	0.098904	0.098904
	0.066673	0.066673	0.066673
	0.10932	0.10932	0.10932
	0.063052	0.063052	0.063052
	0.048727	0.048727	0.048727
	0.065104	0.065104	0.065104
	0.0057137	0.0057137	0.0057137
	0.045951	0.045951	0.045951
	0.086108	0.086108	0.086108
	-0.016256	-0.016256	-0.016256
	-0.0051504	-0.0051504	-0.0051504
	0.044824	0.044824	0.044824
	0.031586	0.031586	0.031586
	0.14264	0.14264	0.14264
	0.18759	0.18759	0.18759
	0.14208	0.14208	0.14208
	0.12341	0.12341	0.12341
	-0.044824	-0.044824	-0.044824
	-0.18726	-0.18726	-0.18726
	-0.19817	-0.19817	-0.19817
	-0.2741	-0.2741	-0.2741
	-0.34934	-0.34934	-0.34934
	-0.33184	-0.33184	-0.33184
	-0.24328	-0.24328	-0.24328
	-0.10816	-0.10816	-0.10816
	-0.015773	-0.015773	-0.015773
	0.027563	0.027563	0.027563
	0.17881	0.17881	0.17881
	0.33767	0.33767	0.33767
	0.33695	0.33695	0.33695
	0.2535	0.2535	0.2535
	0.23808	0.23808	0.23808
	0.27728	0.27728	0.27728
	0.14823	0.14823	0.14823
	0.012554	0.012554	0.012554
	0.048365	0.048365	0.048365
	0.078342	0.078342	0.078342
	0.04909	0.04909	0.04909
	0.0017302	0.0017302	0.0017302
	0.0041042	0.0041042	0.0041042
	-0.0032592	-0.0032592	-0.0032592
	-0.12031	-0.12031	-0.12031
	-0.2308	-0.2308	-0.2308
	-0.19193	-0.19193	-0.19193
	-0.15632	-0.15632	-0.15632
	-0.19954	-0.19954	-0.19954
	-0.1655	-0.1655	-0.1655
	-0.17109	-0.17109	-0.17109
	-0.22762	-0.22762	-0.22762
	-0.13411	-0.13411	-0.13411
	-0.028971	-0.028971	-0.028971
	-0.080435	-0.080435	-0.080435
	-0.075244	-0.075244	-0.075244
	0.02881	0.02881	0.02881
	0.15479	0.15479	0.15479
	0.26605	0.26605	0.26605
	0.21028	0.21028	0.21028
	0.21579	0.21579	0.21579
	0.2918	0.2918	0.2918
	0.15089	0.15089	0.15089
	0.046877	0.046877	0.046877
	0.060316	0.060316	0.060316
	-0.016819	-0.016819	-0.016819
	-0.091741	-0.091741	-0.091741
	-0.16356	-0.16356	-0.16356
	-0.23531	-0.23531	-0.23531
	-0.16055	-0.16055	-0.16055
	-0.10844	-0.10844	-0.10844
	-0.1585	-0.1585	-0.1585
	-0.087315	-0.087315	-0.087315
	-0.026718	-0.026718	-0.026718
	-0.055689	-0.055689	-0.055689
	0.0077658	0.0077658	0.0077658
	0.015371	0.015371	0.015371
	-0.0027764	-0.0027764	-0.0027764
	0.14131	0.14131	0.14131
	0.19089	0.19089	0.19089
	0.15351	0.15351	0.15351
	0.19797	0.19797	0.19797
	0.11946	0.11946	0.11946
	0.060235	0.060235	0.060235
	0.11745	0.11745	0.11745
	0.04064	0.04064	0.04064
	-0.01702	-0.01702	-0.01702
	-0.015612	-0.015612	-0.015612
	-0.10904	-0.10904	-0.10904
	-0.063535	-0.063535	-0.063535
	0.034846	0.034846	0.034846
	-0.057338	-0.057338	-0.057338
	-0.034081	-0.034081	-0.034081
	0.03899	0.03899	0.03899
	0.012997	0.012997	0.012997
	0.073232	0.073232	0.073232
	0.027844	0.027844	0.027844
	-0.052309	-0.052309	-0.052309
	0.029816	0.029816	0.029816
	0.014928	0.014928	0.014928
	-0.034081	-0.034081	-0.034081
	0.056493	0.056493	0.056493
	0.082366	0.082366	0.082366
	0.085826	0.085826	0.085826
	0.049935	0.049935	0.049935
	-0.053999	-0.053999	-0.053999
	0.02028	0.02028	0.02028
	0.066955	0.066955	0.066955
	-0.07114	-0.07114	-0.07114
	-0.068605	-0.068605	-0.068605
	0.024022	0.024022	0.024022
	-0.014646	-0.014646	-0.014646
	-0.014405	-0.014405	-0.014405
	-0.037461	-0.037461	-0.037461
	-0.025028	-0.025028	-0.025028
	0.064903	0.064903	0.064903
	-0.016336	-0.016336	-0.016336
	-0.034886	-0.034886	-0.034886
	0.026838	0.026838	0.026838
	0.027724	0.027724	0.027724
	0.051182	0.051182	0.051182
	0.12385	0.12385	0.12385
	0.14638	0.14638	0.14638
	0.037179	0.037179	0.037179
	-0.043537	-0.043537	-0.043537
	-0.067357	-0.067357	-0.067357
	-0.041686	-0.041686	-0.041686
	-0.031385	-0.031385	-0.031385
	-0.061966	-0.061966	-0.061966
	-0.04748	-0.04748	-0.04748
	-0.039594	-0.039594	-0.039594
	-0.075043	-0.075043	-0.075043
	-0.08985	-0.08985	-0.08985
	-0.053033	-0.053033	-0.053033
	-0.075324	-0.075324	-0.075324
	-0.12494	-0.12494	-0.12494
	-0.094316	-0.094316	-0.094316
	-0.019837	-0.019837	-0.019837
	0.018509	0.018509	0.018509
	0.0073634	0.0073634	0.0073634
	-0.04072	-0.04072	-0.04072
	-0.046917	-0.046917	-0.046917
	0.036375	0.036375	0.036375
	0.065587	0.065587	0.065587
	0.1092	0.1092	0.1092
	0.19302	0.19302	0.19302
	0.13512	0.13512	0.13512
	0.080877	0.080877	0.080877
	0.096047	0.096047	0.096047
	0.043134	0.043134	0.043134
	-0.023297	-0.023297	-0.023297
	-0.068001	-0.068001	-0.068001
	-0.086028	-0.086028	-0.086028
	-0.02716	-0.02716	-0.02716
	-0.016618	-0.016618	-0.016618
	-0.080998	-0.080998	-0.080998
	-0.02704	-0.02704	-0.02704
	-0.037381	-0.037381	-0.037381
	-0.1692	-0.1692	-0.1692
	-0.12297	-0.12297	-0.12297
	-0.049653	-0.049653	-0.049653
	-0.030621	-0.030621	-0.030621
	0.063816	0.063816	0.063816
	0.058465	0.058465	0.058465
	0.039996	0.039996	0.039996
	0.096851	0.096851	0.096851
	0.052751	0.052751	0.052751
	0.095041	0.095041	0.095041
	0.23052	0.23052	0.23052
	0.16811	0.16811	0.16811
	0.10578	0.10578	0.10578
	0.16075	0.16075	0.16075
	0.10989	0.10989	0.10989
	0.053757	0.053757	0.053757
	0.014003	0.014003	0.014003
	-0.028569	-0.028569	-0.028569
	0.051142	0.051142	0.051142
	0.034483	0.034483	0.034483
	-0.13741	-0.13741	-0.13741
	-0.15894	-0.15894	-0.15894
	-0.11351	-0.11351	-0.11351
	-0.14168	-0.14168	-0.14168
	-0.096731	-0.096731	-0.096731
	-0.10442	-0.10442	-0.10442
	-0.087194	-0.087194	-0.087194
	0.07621	0.07621	0.07621
	0.069772	0.069772	0.069772
	0.015854	0.015854	0.015854
	0.072065	0.072065	0.072065
	0.042893	0.042893	0.042893
	0.036455	0.036455	0.036455
	0.059994	0.059994	0.059994
	0.021728	0.021728	0.021728
	0.095564	0.095564	0.095564
	0.14312	0.14312	0.14312
	0.0006438	0.0006438	0.0006438
	-0.037622	-0.037622	-0.037622
	-0.036053	-0.036053	-0.036053
	-0.11379	-0.11379	-0.11379
	-0.060598	-0.060598	-0.060598
	-0.095845	-0.095845	-0.095845
	-0.13938	-0.13938	-0.13938
	0.042289	0.042289	0.042289
	0.082205	0.082205	0.082205
	0.046474	0.046474	0.046474
	0.07629	0.07629	0.07629
	-0.013198	-0.013198	-0.013198
	-0.019716	-0.019716	-0.019716
	0.026677	0.026677	0.026677
	-0.065144	-0.065144	-0.065144
	-0.032954	-0.032954	-0.032954
	0.026235	0.026235	0.026235
	-0.081642	-0.081642	-0.081642
	-0.1057	-0.1057	-0.1057
	-0.10639	-0.10639	-0.10639
	-0.10003	-0.10003	-0.10003
	0.028005	0.028005	0.028005
	0.051705	0.051705	0.051705
	0.040881	0.040881	0.040881
	0.14823	0.14823	0.14823
	0.15757	0.15757	0.15757
	0.11395	0.11395	0.11395
	0.13476	0.13476	0.13476
	0.071703	0.071703	0.071703
	0.036777	0.036777	0.036777
	0.043175	0.043175	0.043175
	-0.019113	-0.019113	-0.019113
	-0.02704	-0.02704	-0.02704
	-0.041968	-0.041968	-0.041968
	-0.077417	-0.077417	-0.077417
	-0.058545	-0.058545	-0.058545
	-0.062086	-0.062086	-0.062086
	-0.088844	-0.088844	-0.088844
	-0.075606	-0.075606	-0.075606
	-0.034282	-0.034282	-0.034282
	0.025591	0.025591	0.025591
	0.055568	0.055568	0.055568
	0.0509	0.0509	0.0509
	0.061282	0.061282	0.061282
	0.037743	0.037743	0.037743
	0.021447	0.021447	0.021447
	0.034604	0.034604	0.034604
	0.051343	0.051343	0.051343
	0.09834	0.09834	0.09834
	0.10019	0.10019	0.10019
	0.041927	0.041927	0.041927
	0.054361	0.054361	0.054361
	0.048687	0.048687	0.048687
	-0.031989	-0.031989	-0.031989
	-0.024102	-0.024102	-0.024102
	-0.020239	-0.020239	-0.020239
	-0.06273	-0.06273	-0.06273
	-0.023619	-0.023619	-0.023619
	-0.031385	-0.031385	-0.031385
	-0.068605	-0.068605	-0.068605
	-0.024022	-0.024022	-0.024022
	-0.064863	-0.064863	-0.064863
	-0.09657	-0.09657	-0.09657
	-0.014284	-0.014284	-0.014284
	0.0069208	0.0069208	0.0069208
	0.051343	0.051343	0.051343
	0.12997	0.12997	0.12997
	0.07295	0.07295	0.07295
	0.03899	0.03899	0.03899
	0.048204	0.048204	0.048204
	-0.036093	-0.036093	-0.036093
	-0.046917	-0.046917	-0.046917
	-0.021125	-0.021125	-0.021125
	-0.063897	-0.063897	-0.063897
	-0.017302	-0.017302	-0.017302
	0.0037018	0.0037018	0.0037018
	-0.080314	-0.080314	-0.080314
	-0.046434	-0.046434	-0.046434
	-0.015974	-0.015974	-0.015974
	-0.036133	-0.036133	-0.036133
	0.058183	0.058183	0.058183
	0.069007	0.069007	0.069007
	0.0039835	0.0039835	0.0039835
	0.044824	0.044824	0.044824
	0.018751	0.018751	0.018751
	-0.021366	-0.021366	-0.021366
	0.023941	0.023941	0.023941
	-0.036334	-0.036334	-0.036334
	-0.016296	-0.016296	-0.016296
	0.092908	0.092908	0.092908
	0.032311	0.032311	0.032311
	0.019636	0.019636	0.019636
	0.050216	0.050216	0.050216
	-0.03899	-0.03899	-0.03899
	-0.020038	-0.020038	-0.020038
	0.043014	0.043014	0.043014
	0.019716	0.019716	0.019716
	0.089448	0.089448	0.089448
	0.096409	0.096409	0.096409
	-0.0038628	-0.0038628	-0.0038628
	-0.0028569	-0.0028569	-0.0028569
	-0.041766	-0.041766	-0.041766
	-0.084338	-0.084338	-0.084338
	-0.018952	-0.018952	-0.018952
	-0.049331	-0.049331	-0.049331
	-0.048526	-0.048526	-0.048526
	0.044664	0.044664	0.044664
	0.016578	0.016578	0.016578
	0.026154	0.026154	0.026154
	0.053878	0.053878	0.053878
	-0.012474	-0.012474	-0.012474
	0.0098984	0.0098984	0.0098984
	0.022211	0.022211	0.022211
	-0.023539	-0.023539	-0.023539
	0.032874	0.032874	0.032874
	0.034805	0.034805	0.034805
	-0.0052711	-0.0052711	-0.0052711
	0.057338	0.057338	0.057338
	0.047038	0.047038	0.047038
	0.050578	0.050578	0.050578
	0.12268	0.12268	0.12268
	0.042893	0.042893	0.042893
	-0.017342	-0.017342	-0.017342
	0.018308	0.018308	0.018308
	-0.025068	-0.025068	-0.025068
	-0.077658	-0.077658	-0.077658
	-0.12168	-0.12168	-0.12168
	-0.10558	-0.10558	-0.10558
	-0.023096	-0.023096	-0.023096
	-0.080958	-0.080958	-0.080958
	-0.15125	-0.15125	-0.15125
	-0.036053	-0.036053	-0.036053
	0.14522	0.14522	0.14522
	0.18014	0.18014	0.18014
	0.075767	0.075767	0.075767
	0.089649	0.089649	0.089649
	0.16775	0.16775	0.16775
	0.068404	0.068404	0.068404
	-0.073956	-0.073956	-0.073956
	-0.046072	-0.046072	-0.046072
	0.036415	0.036415	0.036415
	-0.011629	-0.011629	-0.011629
	-0.129	-0.129	-0.129
	-0.091218	-0.091218	-0.091218
	0.053073	0.053073	0.053073
	0.026154	0.026154	0.026154
	-0.075083	-0.075083	-0.075083
	-0.029414	-0.029414	-0.029414
	-0.0074842	-0.0074842	-0.0074842
	-0.067639	-0.067639	-0.067639
	-0.014767	-0.014767	-0.014767
	0.043698	0.043698	0.043698
	0.066673	0.066673	0.066673
	0.052429	0.052429	0.052429
	-0.0037018	-0.0037018	-0.0037018
	0.047158	0.047158	0.047158
	0.0075244	0.0075244	0.0075244
	-0.083734	-0.083734	-0.083734
	0.017101	0.017101	0.017101
	0.069933	0.069933	0.069933
	-0.036576	-0.036576	-0.036576
	-0.014646	-0.014646	-0.014646
	0.095604	0.095604	0.095604
	0.06945	0.06945	0.06945
	0.004064	0.004064	0.004064
	-0.065346	-0.065346	-0.065346
	-0.03899	-0.03899	-0.03899
	0.078986	0.078986	0.078986
	-0.016497	-0.016497	-0.016497
	-0.083332	-0.083332	-0.083332
	0.042974	0.042974	0.042974
	-0.0052309	-0.0052309	-0.0052309
	-0.087758	-0.087758	-0.087758
	-0.015089	-0.015089	-0.015089
	-0.0069208	-0.0069208	-0.0069208
	-0.0058747	-0.0058747	-0.0058747
	0.022654	0.022654	0.022654
	-0.0028166	-0.0028166	-0.0028166
	0.079026	0.079026	0.079026
	0.10558	0.10558	0.10558
	-0.017101	-0.017101	-0.017101
	0.023821	0.023821	0.023821
	0.048486	0.048486	0.048486
	-0.077014	-0.077014	-0.077014
	-0.049814	-0.049814	-0.049814
	-0.0046273	-0.0046273	-0.0046273
	-0.01352	-0.01352	-0.01352
	0.044543	0.044543	0.044543
	-0.024344	-0.024344	-0.024344
	-0.055206	-0.055206	-0.055206
	0.057419	0.057419	0.057419
	0.048204	0.048204	0.048204
	0.094075	0.094075	0.094075
	0.21825	0.21825	0.21825
	0.12884	0.12884	0.12884
	0.036214	0.036214	0.036214
	0.015491	0.015491	0.015491
	-0.097616	-0.097616	-0.097616
	-0.076008	-0.076008	-0.076008
	-0.076411	-0.076411	-0.076411
	-0.2603	-0.2603	-0.2603
	-0.22191	-0.22191	-0.22191
	-0.13528	-0.13528	-0.13528
	-0.17053	-0.17053	-0.17053
	-0.075204	-0.075204	-0.075204
	-0.014928	-0.014928	-0.014928
	0.089045	0.089045	0.089045
	0.30085	0.30085	0.30085
	0.22617	0.22617	0.22617
	0.14976	0.14976	0.14976
	0.30041	0.30041	0.30041
	0.18348	0.18348	0.18348
	-0.011347	-0.011347	-0.011347
	0.014606	0.014606	0.014606
	0.039433	0.039433	0.039433
	0.10172	0.10172	0.10172
	0.037461	0.037461	0.037461
	-0.09154	-0.09154	-0.09154
	0.065547	0.065547	0.065547
	0.077296	0.077296	0.077296
	-0.10965	-0.10965	-0.10965
	-0.073997	-0.073997	-0.073997
	-0.063334	-0.063334	-0.063334
	-0.11351	-0.11351	-0.11351
	-0.048406	-0.048406	-0.048406
	-0.058103	-0.058103	-0.058103
	-0.12091	-0.12091	-0.12091
	-0.16155	-0.16155	-0.16155
	-0.18183	-0.18183	-0.18183
	-0.091218	-0.091218	-0.091218
	-0.068484	-0.068484	-0.068484
	-0.11262	-0.11262	-0.11262
	0.039996	0.039996	0.039996
	0.18646	0.18646	0.18646
	0.14304	0.14304	0.14304
	0.14767	0.14767	0.14767
	0.24412	0.24412	0.24412
	0.2335	0.2335	0.2335
	0.090574	0.090574	0.090574
	-0.0056332	-0.0056332	-0.0056332
	0.044623	0.044623	0.044623
	0.073715	0.073715	0.073715
	-0.046072	-0.046072	-0.046072
	-0.16332	-0.16332	-0.16332
	-0.15946	-0.15946	-0.15946
	-0.092868	-0.092868	-0.092868
	-0.058948	-0.058948	-0.058948
	-0.06788	-0.06788	-0.06788
	-0.038668	-0.038668	-0.038668
	-0.0058344	-0.0058344	-0.0058344
	-0.017141	-0.017141	-0.017141
	-0.0086913	-0.0086913	-0.0086913
	-0.016336	-0.016336	-0.016336
	-0.056654	-0.056654	-0.056654
	-0.024263	-0.024263	-0.024263
	0.034966	0.034966	0.034966
	0.055447	0.055447	0.055447
	0.10196	0.10196	0.10196
	0.099346	0.099346	0.099346
	0.068082	0.068082	0.068082
	0.11395	0.11395	0.11395
	0.077739	0.077739	0.077739
	-0.016739	-0.016739	-0.016739
	-0.014445	-0.014445	-0.014445
	-0.029011	-0.029011	-0.029011
	-0.009496	-0.009496	-0.009496
	0.062811	0.062811	0.062811
	0.0033397	0.0033397	0.0033397
	-0.027241	-0.027241	-0.027241
	-0.015049	-0.015049	-0.015049
	-0.1222	-0.1222	-0.1222
	-0.13041	-0.13041	-0.13041
	-0.060718	-0.060718	-0.060718
	-0.093391	-0.093391	-0.093391
	-0.041525	-0.041525	-0.041525
	0.023016	0.023016	0.023016
	-0.021245	-0.021245	-0.021245
	0.03396	0.03396	0.03396
	0.062569	0.062569	0.062569
	0.014687	0.014687	0.014687
	0.069208	0.069208	0.069208
	0.071663	0.071663	0.071663
	0.077256	0.077256	0.077256
	0.18155	0.18155	0.18155
	0.11782	0.11782	0.11782
	0.033035	0.033035	0.033035
	0.087798	0.087798	0.087798
	0.033759	0.033759	0.033759
	0.012715	0.012715	0.012715
	0.075284	0.075284	0.075284
	0.051383	0.051383	0.051383
	0.062811	0.062811	0.062811
	0.026557	0.026557	0.026557
	-0.098743	-0.098743	-0.098743
	-0.1057	-0.1057	-0.1057
	-0.10333	-0.10333	-0.10333
	-0.19716	-0.19716	-0.19716
	-0.092103	-0.092103	-0.092103
	0.04583	0.04583	0.04583
	0.0035007	0.0035007	0.0035007
	0.011146	0.011146	0.011146
	-0.06265	-0.06265	-0.06265
	-0.060919	-0.060919	-0.060919
	0.072146	0.072146	0.072146
	-0.004064	-0.004064	-0.004064
	-0.039956	-0.039956	-0.039956
	0.081481	0.081481	0.081481
	0.086349	0.086349	0.086349
	0.057177	0.057177	0.057177
	0.06788	0.06788	0.06788
	0.03219	0.03219	0.03219
	0.03557	0.03557	0.03557
	-0.014928	-0.014928	-0.014928
	-0.045428	-0.045428	-0.045428
	0.05762	0.05762	0.05762
	0.006438	0.006438	0.006438
	-0.10538	-0.10538	-0.10538
	-0.076491	-0.076491	-0.076491
	-0.11689	-0.11689	-0.11689
	-0.17089	-0.17089	-0.17089
	-0.10675	-0.10675	-0.10675
	-0.056252	-0.056252	-0.056252
	0.018187	0.018187	0.018187
	0.089086	0.089086	0.089086
	0.12731	0.12731	0.12731
	0.20316	0.20316	0.20316
	0.15503	0.15503	0.15503
	0.043376	0.043376	0.043376
	0.086349	0.086349	0.086349
	0.12482	0.12482	0.12482
	0.056976	0.056976	0.056976
	0.00169	0.00169	0.00169
	-0.012635	-0.012635	-0.012635
	-0.052993	-0.052993	-0.052993
	-0.15318	-0.15318	-0.15318
	-0.1857	-0.1857	-0.1857
	-0.13065	-0.13065	-0.13065
	-0.089126	-0.089126	-0.089126
	-0.055045	-0.055045	-0.055045
	-0.018791	-0.018791	-0.018791
	0.028689	0.028689	0.028689
	0.038507	0.038507	0.038507
	0.00068404	0.00068404	0.00068404
	0.061442	0.061442	0.061442
	0.1762	0.1762	0.1762
	0.13061	0.13061	0.13061
	0.065386	0.065386	0.065386
	0.14337	0.14337	0.14337
	0.16855	0.16855	0.16855
	0.11343	0.11343	0.11343
	0.04571	0.04571	0.04571
	0.026396	0.026396	0.026396
	0.10961	0.10961	0.10961
	0.091419	0.091419	0.091419
	-0.10985	-0.10985	-0.10985
	-0.21346	-0.21346	-0.21346
	-0.1391	-0.1391	-0.1391
	-0.16344	-0.16344	-0.16344
	-0.22018	-0.22018	-0.22018
	-0.21974	-0.21974	-0.21974
	-0.16115	-0.16115	-0.16115
	0.058908	0.058908	0.058908
	0.077739	0.077739	0.077739
	-0.048003	-0.048003	-0.048003
	0.029253	0.029253	0.029253
	0.06611	0.06611	0.06611
	0.064702	0.064702	0.064702
	0.089448	0.089448	0.089448
	0.016859	0.016859	0.016859
	0.03058	0.03058	0.03058
	0.15322	0.15322	0.15322
	0.13021	0.13021	0.13021
	0.092425	0.092425	0.092425
	0.093431	0.093431	0.093431
	-0.046193	-0.046193	-0.046193
	-0.068082	-0.068082	-0.068082
	-0.035328	-0.035328	-0.035328
	-0.11657	-0.11657	-0.11657
	-0.012192	-0.012192	-0.012192
	0.081883	0.081883	0.081883
	-0.029494	-0.029494	-0.029494
	-0.054924	-0.054924	-0.054924
	-0.046273	-0.046273	-0.046273
	-0.072226	-0.072226	-0.072226
	-0.035047	-0.035047	-0.035047
	-0.096811	-0.096811	-0.096811
	-0.11685	-0.11685	-0.11685
	0.022573	0.022573	0.022573
	0.028005	0.028005	0.028005
	-0.0065587	-0.0065587	-0.0065587
	0.046917	0.046917	0.046917
	0.033759	0.033759	0.033759
	0.034121	0.034121	0.034121
	0.066191	0.066191	0.066191
	0.016336	0.016336	0.016336
	0.065466	0.065466	0.065466
	0.13484	0.13484	0.13484
	0.03219	0.03219	0.03219
	0.041123	0.041123	0.041123
	0.083412	0.083412	0.083412
	0.0041042	0.0041042	0.0041042
	0.014767	0.014767	0.014767
	-0.011226	-0.011226	-0.011226
	-0.050659	-0.050659	-0.050659
	0.039634	0.039634	0.039634
	0.012192	0.012192	0.012192
	-0.033035	-0.033035	-0.033035
	0.051665	0.051665	0.051665
	-0.031264	-0.031264	-0.031264
	-0.081843	-0.081843	-0.081843
	0.025189	0.025189	0.025189
	0.00060356	0.00060356	0.00060356
	0.029856	0.029856	0.029856
	0.085867	0.085867	0.085867
	0.023901	0.023901	0.023901
	0.044422	0.044422	0.044422
	0.024505	0.024505	0.024505
	-0.063857	-0.063857	-0.063857
	0.025068	0.025068	0.025068
	0.046394	0.046394	0.046394
	-0.015491	-0.015491	-0.015491
	0.067679	0.067679	0.067679
	0.074198	0.074198	0.074198
	0.048808	0.048808	0.048808
	0.067639	0.067639	0.067639
	0.017704	0.017704	0.017704
	0.033115	0.033115	0.033115
	0.082768	0.082768	0.082768
	0.021929	0.021929	0.021929
	8.05E-05	8.05E-05	8.05E-05
	0.00060356	0.00060356	0.00060356
	-0.062931	-0.062931	-0.062931
	-0.07621	-0.07621	-0.07621
	-0.11745	-0.11745	-0.11745
	-0.17813	-0.17813	-0.17813
	-0.14679	-0.14679	-0.14679
	-0.094236	-0.094236	-0.094236
	-0.061563	-0.061563	-0.061563
	-0.0074842	-0.0074842	-0.0074842
	0.041525	0.041525	0.041525
	0.06269	0.06269	0.06269
	0.061161	0.061161	0.061161
	0.048325	0.048325	0.048325
	0.058022	0.058022	0.058022
	0.029695	0.029695	0.029695
	0.0050699	0.0050699	0.0050699
	0.018147	0.018147	0.018147
	0.0035811	0.0035811	0.0035811
	0.0049492	0.0049492	0.0049492
	-0.0009657	-0.0009657	-0.0009657
	-0.032633	-0.032633	-0.032633
	-0.01521	-0.01521	-0.01521
	-0.029414	-0.029414	-0.029414
	-0.080032	-0.080032	-0.080032
	-0.027482	-0.027482	-0.027482
	-0.019153	-0.019153	-0.019153
	-0.057016	-0.057016	-0.057016
	0.00012071	0.00012071	0.00012071
	-0.021768	-0.021768	-0.021768
	-0.042933	-0.042933	-0.042933
	0.015854	0.015854	0.015854
	-0.026999	-0.026999	-0.026999
	-0.036415	-0.036415	-0.036415
	0.021809	0.021809	0.021809
	0.0035811	0.0035811	0.0035811
	0.044985	0.044985	0.044985
	0.11387	0.11387	0.11387
	0.082849	0.082849	0.082849
	0.10353	0.10353	0.10353
	0.11488	0.11488	0.11488
	0.030701	0.030701	0.030701
	0.036093	0.036093	0.036093
	0.026396	0.026396	0.026396
	-0.063977	-0.063977	-0.063977
	-0.017383	-0.017383	-0.017383
	0.0043054	0.0043054	0.0043054
	-0.05255	-0.05255	-0.05255
	-0.022734	-0.022734	-0.022734
	-0.062448	-0.062448	-0.062448
	-0.053395	-0.053395	-0.053395
	0.10273	0.10273	0.10273
	0.10711	0.10711	0.10711
	0.051303	0.051303	0.051303
	0.074198	0.074198	0.074198
	0.0065185	0.0065185	0.0065185
	-0.015894	-0.015894	-0.015894
	0.045991	0.045991	0.045991
	-0.031385	-0.031385	-0.031385
	-0.059672	-0.059672	-0.059672
	0.025832	0.025832	0.025832
	0.030983	0.030983	0.030983
	0.083654	0.083654	0.083654
	0.087959	0.087959	0.087959
	0.016216	0.016216	0.016216
	0.086953	0.086953	0.086953
	0.08482	0.08482	0.08482
	-0.0022935	-0.0022935	-0.0022935
	0.089609	0.089609	0.089609
	0.1321	0.1321	0.1321
	0.023096	0.023096	0.023096
	-0.021245	-0.021245	-0.021245
	-0.11492	-0.11492	-0.11492
	-0.093592	-0.093592	-0.093592
	0.021889	0.021889	0.021889
	-0.092908	-0.092908	-0.092908
	-0.095161	-0.095161	-0.095161
	0.090574	0.090574	0.090574
	0.078302	0.078302	0.078302
	-0.045871	-0.045871	-0.045871
	-0.11138	-0.11138	-0.11138
	-0.14111	-0.14111	-0.14111
	-0.06108	-0.06108	-0.06108
	-0.11552	-0.11552	-0.11552
	-0.18348	-0.18348	-0.18348
	-0.013117	-0.013117	-0.013117
	0.0092546	0.0092546	0.0092546
	-0.03565	-0.03565	-0.03565
	0.061121	0.061121	0.061121
	0.11427	0.11427	0.11427
	0.05259	0.05259	0.05259
	0.0075646	0.0075646	0.0075646
	0.064702	0.064702	0.064702
	0.23937	0.23937	0.23937
	0.29072	0.29072	0.29072
	0.085947	0.085947	0.085947
	0.0084499	0.0084499	0.0084499
	-0.0096167	-0.0096167	-0.0096167
	-0.12912	-0.12912	-0.12912
	-0.15089	-0.15089	-0.15089
	-0.091741	-0.091741	-0.091741
	-0.070697	-0.070697	-0.070697
	-0.08478	-0.08478	-0.08478
	-0.044905	-0.044905	-0.044905
	0.045549	0.045549	0.045549
	0.020481	0.020481	0.020481
	-0.10961	-0.10961	-0.10961
	-0.11146	-0.11146	-0.11146
	-0.0053918	-0.0053918	-0.0053918
	0.044623	0.044623	0.044623
	0.048446	0.048446	0.048446
	0.13572	0.13572	0.13572
	0.19201	0.19201	0.19201
	0.06442	0.06442	0.06442
	-0.041968	-0.041968	-0.041968
	-0.0069208	-0.0069208	-0.0069208
	-0.018026	-0.018026	-0.018026
	-0.099306	-0.099306	-0.099306
	-0.065748	-0.065748	-0.065748
	0.0063575	0.0063575	0.0063575
	0.010261	0.010261	0.010261
	-0.068806	-0.068806	-0.068806
	-0.13604	-0.13604	-0.13604
	-0.033317	-0.033317	-0.033317
	0.038024	0.038024	0.038024
	-0.015813	-0.015813	-0.015813
	0.084338	0.084338	0.084338
	0.21893	0.21893	0.21893
	0.14401	0.14401	0.14401
	0.081803	0.081803	0.081803
	0.068243	0.068243	0.068243
	0.048607	0.048607	0.048607
	0.046434	0.046434	0.046434
	-0.0169	-0.0169	-0.0169
	0.0064782	0.0064782	0.0064782
	0.12771	0.12771	0.12771
	0.06603	0.06603	0.06603
	-0.070335	-0.070335	-0.070335
	-0.066351	-0.066351	-0.066351
	-0.11548	-0.11548	-0.11548
	-0.15507	-0.15507	-0.15507
	-0.13045	-0.13045	-0.13045
	-0.1859	-0.1859	-0.1859
	-0.11387	-0.11387	-0.11387
	-0.026034	-0.026034	-0.026034
	-0.097294	-0.097294	-0.097294
	-0.0074037	-0.0074037	-0.0074037
	0.14952	0.14952	0.14952
	0.16666	0.16666	0.16666
	0.17028	0.17028	0.17028
	0.1593	0.1593	0.1593
	0.22976	0.22976	0.22976
	0.33799	0.33799	0.33799
	0.15041	0.15041	0.15041
	-0.11138	-0.11138	-0.11138
	-0.0022533	-0.0022533	-0.0022533
	0.074681	0.074681	0.074681
	-0.058143	-0.058143	-0.058143
	-0.096328	-0.096328	-0.096328
	-0.12743	-0.12743	-0.12743
	-0.063334	-0.063334	-0.063334
	-0.026798	-0.026798	-0.026798
	-0.17274	-0.17274	-0.17274
	-0.1688	-0.1688	-0.1688
	-0.09484	-0.09484	-0.09484
	-0.14184	-0.14184	-0.14184
	-0.071381	-0.071381	-0.071381
	0.030741	0.030741	0.030741
	-0.019274	-0.019274	-0.019274
	0.062851	0.062851	0.062851
	0.1294	0.1294	0.1294
	-0.0006438	-0.0006438	-0.0006438
	-0.02543	-0.02543	-0.02543
	-0.028931	-0.028931	-0.028931
	0.0067599	0.0067599	0.0067599
	0.11081	0.11081	0.11081
	0.033719	0.033719	0.033719
	0.042893	0.042893	0.042893
	0.19853	0.19853	0.19853
	0.095282	0.095282	0.095282
	-0.029373	-0.029373	-0.029373
	0.044664	0.044664	0.044664
	0.049049	0.049049	0.049049
	0.048084	0.048084	0.048084
	-0.017986	-0.017986	-0.017986
	-0.13484	-0.13484	-0.13484
	-0.043295	-0.043295	-0.043295
	-0.041324	-0.041324	-0.041324
	-0.15298	-0.15298	-0.15298
	-0.07118	-0.07118	-0.07118
	-0.022211	-0.022211	-0.022211
	-0.03215	-0.03215	-0.03215
	0.049774	0.049774	0.049774
	0.041042	0.041042	0.041042
	0.058063	0.058063	0.058063
	0.1018	0.1018	0.1018
	0.011106	0.011106	0.011106
	0.017785	0.017785	0.017785
	0.05931	0.05931	0.05931
	-0.0065587	-0.0065587	-0.0065587
	0.0082889	0.0082889	0.0082889
	0.047722	0.047722	0.047722
	0.030178	0.030178	0.030178
	0.033236	0.033236	0.033236
	-0.0060356	-0.0060356	-0.0060356
	-0.0050297	-0.0050297	-0.0050297
	0.057218	0.057218	0.057218
	0.097415	0.097415	0.097415
	0.15395	0.15395	0.15395
	0.16324	0.16324	0.16324
	0.097093	0.097093	0.097093
	-8.05E-05	-8.05E-05	-8.05E-05
	-0.10248	-0.10248	-0.10248
	-0.16014	-0.16014	-0.16014
	-0.18316	-0.18316	-0.18316
	-0.25012	-0.25012	-0.25012
	-0.27961	-0.27961	-0.27961
	-0.21648	-0.21648	-0.21648
	-0.12421	-0.12421	-0.12421
	-0.011548	-0.011548	-0.011548
	0.022292	0.022292	0.022292
	0.040237	0.040237	0.040237
	0.19974	0.19974	0.19974
	0.30669	0.30669	0.30669
	0.25317	0.25317	0.25317
	0.21471	0.21471	0.21471
	0.20903	0.20903	0.20903
	0.18799	0.18799	0.18799
	0.13037	0.13037	0.13037
	0.056493	0.056493	0.056493
	0.067398	0.067398	0.067398
	0.089287	0.089287	0.089287
	-0.01022	-0.01022	-0.01022
	-0.086913	-0.086913	-0.086913
	-0.058425	-0.058425	-0.058425
	-0.15097	-0.15097	-0.15097
	-0.21897	-0.21897	-0.21897
	-0.16859	-0.16859	-0.16859
	-0.22625	-0.22625	-0.22625
	-0.1826	-0.1826	-0.1826
	-0.064863	-0.064863	-0.064863
	-0.10856	-0.10856	-0.10856
	-0.12956	-0.12956	-0.12956
	-0.14304	-0.14304	-0.14304
	-0.11685	-0.11685	-0.11685
	0.040237	0.040237	0.040237
	0.0080877	0.0080877	0.0080877
	-0.054361	-0.054361	-0.054361
	0.13274	0.13274	0.13274
	0.21334	0.21334	0.21334
	0.16111	0.16111	0.16111
	0.22988	0.22988	0.22988
	0.24344	0.24344	0.24344
	0.16578	0.16578	0.16578
	0.12534	0.12534	0.12534
	0.028367	0.028367	0.028367
	0.0055528	0.0055528	0.0055528
	0.030782	0.030782	0.030782
	-0.13335	-0.13335	-0.13335
	-0.20324	-0.20324	-0.20324
	-0.16449	-0.16449	-0.16449
	-0.20517	-0.20517	-0.20517
	-0.11508	-0.11508	-0.11508
	-0.055286	-0.055286	-0.055286
	-0.10003	-0.10003	-0.10003
	-0.022493	-0.022493	-0.022493
	0.022774	0.022774	0.022774
	-0.023418	-0.023418	-0.023418
	0.0084096	0.0084096	0.0084096
	0.03722	0.03722	0.03722
	0.11355	0.11355	0.11355
	0.26396	0.26396	0.26396
	0.18646	0.18646	0.18646
	0.11858	0.11858	0.11858
	0.16912	0.16912	0.16912
	0.025591	0.025591	0.025591
	-0.038789	-0.038789	-0.038789
	-0.0055125	-0.0055125	-0.0055125
	-0.096489	-0.096489	-0.096489
	-0.066432	-0.066432	-0.066432
	-0.022372	-0.022372	-0.022372
	-0.057057	-0.057057	-0.057057
	0.012594	0.012594	0.012594
	-0.036536	-0.036536	-0.036536
	-0.08144	-0.08144	-0.08144
	0.046675	0.046675	0.046675
	0.086108	0.086108	0.086108
	0.088482	0.088482	0.088482
	0.1294	0.1294	0.1294
	0.098944	0.098944	0.098944
	0.10341	0.10341	0.10341
	0.10518	0.10518	0.10518
	-0.049291	-0.049291	-0.049291
	-0.049251	-0.049251	-0.049251
	0.057499	0.057499	0.057499
	0.032673	0.032673	0.032673
	0.0038226	0.0038226	0.0038226
	-0.056332	-0.056332	-0.056332
	-0.068041	-0.068041	-0.068041
	0.0052711	0.0052711	0.0052711
	-0.064621	-0.064621	-0.064621
	-0.17242	-0.17242	-0.17242
	-0.10389	-0.10389	-0.10389
	-0.019596	-0.019596	-0.019596
	0.0017302	0.0017302	0.0017302
	-0.006438	-0.006438	-0.006438
	0.0041847	0.0041847	0.0041847
	0.051504	0.051504	0.051504
	0.057057	0.057057	0.057057
	0.034001	0.034001	0.034001
	0.020239	0.020239	0.020239
	0.067921	0.067921	0.067921
	0.10144	0.10144	0.10144
	0.084901	0.084901	0.084901
	0.097254	0.097254	0.097254
	0.066673	0.066673	0.066673
	-0.042692	-0.042692	-0.042692
	-0.10071	-0.10071	-0.10071
	-0.087516	-0.087516	-0.087516
	-0.1117	-0.1117	-0.1117
	-0.07287	-0.07287	-0.07287
	0.0056332	0.0056332	0.0056332
	-0.007283	-0.007283	-0.007283
	-0.041807	-0.041807	-0.041807
	-0.10313	-0.10313	-0.10313
	-0.1391	-0.1391	-0.1391
	-0.088321	-0.088321	-0.088321
	-0.095845	-0.095845	-0.095845
	-0.11878	-0.11878	-0.11878
	0.010502	0.010502	0.010502
	0.083774	0.083774	0.083774
	0.032834	0.032834	0.032834
	0.044462	0.044462	0.044462
	0.078624	0.078624	0.078624
	0.080072	0.080072	0.080072
	0.059028	0.059028	0.059028
	0.027844	0.027844	0.027844
	0.07464	0.07464	0.07464
	0.14099	0.14099	0.14099
	0.039151	0.039151	0.039151
	-0.025269	-0.025269	-0.025269
	0.0047078	0.0047078	0.0047078
	-0.10365	-0.10365	-0.10365
	-0.14071	-0.14071	-0.14071
	-0.046877	-0.046877	-0.046877
	-0.035047	-0.035047	-0.035047
	-0.0045468	-0.0045468	-0.0045468
	0.027925	0.027925	0.027925
	-0.010059	-0.010059	-0.010059
	0.015009	0.015009	0.015009
	-0.028528	-0.028528	-0.028528
	-0.10442	-0.10442	-0.10442
	0.016095	0.016095	0.016095
	0.092908	0.092908	0.092908
	0.066472	0.066472	0.066472
	0.14425	0.14425	0.14425
	0.12626	0.12626	0.12626
	0.033156	0.033156	0.033156
	0.06434	0.06434	0.06434
	0.064661	0.064661	0.064661
	0.1014	0.1014	0.1014
	0.1496	0.1496	0.1496
	0.056534	0.056534	0.056534
	0.070254	0.070254	0.070254
	0.10932	0.10932	0.10932
	-0.018429	-0.018429	-0.018429
	-0.076089	-0.076089	-0.076089
	-0.072146	-0.072146	-0.072146
	-0.096208	-0.096208	-0.096208
	-0.031788	-0.031788	-0.031788
	-0.014807	-0.014807	-0.014807
	-0.069208	-0.069208	-0.069208
	0.017302	0.017302	0.017302
	0.020682	0.020682	0.020682
	-0.061563	-0.061563	-0.061563
	-0.0070415	-0.0070415	-0.0070415
	-0.043979	-0.043979	-0.043979
	-0.051826	-0.051826	-0.051826
	0.063092	0.063092	0.063092
	0.013359	0.013359	0.013359
	-0.0045468	-0.0045468	-0.0045468
	0.059833	0.059833	0.059833
	-0.013399	-0.013399	-0.013399
	0.0089729	0.0089729	0.0089729
	0.026275	0.026275	0.026275
	-0.037099	-0.037099	-0.037099
	0.063535	0.063535	0.063535
	0.081601	0.081601	0.081601
	0.014325	0.014325	0.014325
	0.059712	0.059712	0.059712
	0.04068	0.04068	0.04068
	-0.035449	-0.035449	-0.035449
	-0.044824	-0.044824	-0.044824
	-0.085464	-0.085464	-0.085464
	-0.062328	-0.062328	-0.062328
	0.029776	0.029776	0.029776
	-0.0032995	-0.0032995	-0.0032995
	-0.011226	-0.011226	-0.011226
	0.014445	0.014445	0.014445
	-0.034524	-0.034524	-0.034524
	-0.019032	-0.019032	-0.019032
	-0.014164	-0.014164	-0.014164
	-0.073876	-0.073876	-0.073876
	-6.33E-02	-0.063293	-0.063293
	-0.076008	-0.076008	-0.076008
	-0.09496	-0.09496	-0.09496
	-0.059793	-0.059793	-0.059793
	-0.047882	-0.047882	-0.047882
	-0.019394	-0.019394	-0.019394
	0.022694	0.022694	0.022694
	0.070174	0.070174	0.070174
	0.11379	0.11379	0.11379
	0.12248	0.12248	0.12248
	0.12091	0.12091	0.12091
	0.10228	0.10228	0.10228
	0.066995	0.066995	0.066995
	0.049733	0.049733	0.049733
	0.010542	0.010542	0.010542
	-0.044623	-0.044623	-0.044623
	-0.034202	-0.034202	-0.034202
	-0.023056	-0.023056	-0.023056
	-0.014807	-0.014807	-0.014807
	0.030259	0.030259	0.030259
	0.0053918	0.0053918	0.0053918
	-0.041605	-0.041605	-0.041605
	-0.026154	-0.026154	-0.026154
	-0.018187	-0.018187	-0.018187
	0.021648	0.021648	0.021648
	0.067438	0.067438	0.067438
	-0.0017704	-0.0017704	-0.0017704
	-0.020682	-0.020682	-0.020682
	0.028408	0.028408	0.028408
	-0.017503	-0.017503	-0.017503
	-0.013319	-0.013319	-0.013319
	0.053958	0.053958	0.053958
	0.039956	0.039956	0.039956
	0.07456	0.07456	0.07456
	0.12594	0.12594	0.12594
	0.068766	0.068766	0.068766
	0.066351	0.066351	0.066351
	0.025309	0.025309	0.025309
	-0.073232	-0.073232	-0.073232
	-0.019113	-0.019113	-0.019113
	-0.024826	-0.024826	-0.024826
	-0.11431	-0.11431	-0.11431
	-0.089086	-0.089086	-0.089086
	-0.098018	-0.098018	-0.098018
	-0.080475	-0.080475	-0.080475
	0.024344	0.024344	0.024344
	0.017624	0.017624	0.017624
	0.026154	0.026154	0.026154
	0.095805	0.095805	0.095805
	0.037501	0.037501	0.037501
	-0.03388	-0.03388	-0.03388
	-0.01859	-0.01859	-0.01859
	-0.039634	-0.039634	-0.039634
	-0.011387	-0.011387	-0.011387
	0.023941	0.023941	0.023941
	-0.025551	-0.025551	-0.025551
	0.05597	0.05597	0.05597
	0.12606	0.12606	0.12606
	0.027442	0.027442	0.027442
	0.0057539	0.0057539	0.0057539
	0.033115	0.033115	0.033115
	0.030178	0.030178	0.030178
	0.075324	0.075324	0.075324
	0.014204	0.014204	0.014204
	-0.03215	-0.03215	-0.03215
	0.05416	0.05416	0.05416
	-0.0237	-0.0237	-0.0237
	-0.097012	-0.097012	-0.097012
	-0.025671	-0.025671	-0.025671
	-0.053717	-0.053717	-0.053717
	-0.04571	-0.04571	-0.04571
	0.022211	0.022211	0.022211
	-0.0026959	-0.0026959	-0.0026959
	0.025591	0.025591	0.025591
	0.034524	0.034524	0.034524
	-0.055005	-0.055005	-0.055005
	-0.024585	-0.024585	-0.024585
	-0.012635	-0.012635	-0.012635
	-0.045307	-0.045307	-0.045307
	0.042571	0.042571	0.042571
	0.023056	0.023056	0.023056
	-0.02704	-0.02704	-0.02704
	0.052993	0.052993	0.052993
	0.067559	0.067559	0.067559
	0.029574	0.029574	0.029574
	0.029655	0.029655	0.029655
	0.018751	0.018751	0.018751
	0.086551	0.086551	0.086551
	0.10426	0.10426	0.10426
	-0.036053	-0.036053	-0.036053
	-0.044342	-0.044342	-0.044342
	-0.0082084	-0.0082084	-0.0082084
	-0.052791	-0.052791	-0.052791
	-0.03722	-0.03722	-0.03722
	-0.037783	-0.037783	-0.037783
	-0.05259	-0.05259	-0.05259
	-0.0068806	-0.0068806	-0.0068806
	-0.0030178	-0.0030178	-0.0030178
	0.015089	0.015089	0.015089
	0.088361	0.088361	0.088361
	0.086873	0.086873	0.086873
	0.073272	0.073272	0.073272
	0.11226	0.11226	0.11226
	0.11246	0.11246	0.11246
	0.03396	0.03396	0.03396
	-0.042933	-0.042933	-0.042933
	-0.089287	-0.089287	-0.089287
	-0.10558	-0.10558	-0.10558
	-0.092345	-0.092345	-0.092345
	-0.099185	-0.099185	-0.099185
	-0.10124	-0.10124	-0.10124
	-0.018429	-0.018429	-0.018429
	0.048325	0.048325	0.048325
	-0.02378	-0.02378	-0.02378
	-0.029937	-0.029937	-0.029937
	0.069047	0.069047	0.069047
	0.14546	0.14546	0.14546
	0.142	0.142	0.142
	0.037018	0.037018	0.037018
	0.043134	0.043134	0.043134
	0.16055	0.16055	0.16055
	0.078825	0.078825	0.078825
	-0.13347	-0.13347	-0.13347
	-0.08132	-0.08132	-0.08132
	0.058384	0.058384	0.058384
	0.0024545	0.0024545	0.0024545
	-0.041605	-0.041605	-0.041605
	-0.043738	-0.043738	-0.043738
	0.0098179	0.0098179	0.0098179
	0.059511	0.059511	0.059511
	-0.07963	-0.07963	-0.07963
	-0.13729	-0.13729	-0.13729
	-0.072387	-0.072387	-0.072387
	-0.11283	-0.11283	-0.11283
	-0.048687	-0.048687	-0.048687
	0.078624	0.078624	0.078624
	0.022774	0.022774	0.022774
	-0.0059551	-0.0059551	-0.0059551
	0.050981	0.050981	0.050981
	0.0055125	0.0055125	0.0055125
	-0.023338	-0.023338	-0.023338
	0.012554	0.012554	0.012554
	0.031425	0.031425	0.031425
	0.11122	0.11122	0.11122
	0.077135	0.077135	0.077135
	-0.018509	-0.018509	-0.018509
	0.12639	0.12639	0.12639
	0.12369	0.12369	0.12369
	-0.063615	-0.063615	-0.063615
	-0.021406	-0.021406	-0.021406
	0.019636	0.019636	0.019636
	0.015773	0.015773	0.015773
	0.041807	0.041807	0.041807
	-0.046032	-0.046032	-0.046032
	-0.048446	-0.048446	-0.048446
	-0.0083694	-0.0083694	-0.0083694
	-0.1181	-0.1181	-0.1181
	-0.10498	-0.10498	-0.10498
	0.016618	0.016618	0.016618
	-0.021607	-0.021607	-0.021607
	-0.0028569	-0.0028569	-0.0028569
	0.077739	0.077739	0.077739
	0.019193	0.019193	0.019193
	0.011226	0.011226	0.011226
	0.010341	0.010341	0.010341
	-0.030621	-0.030621	-0.030621
	0.058586	0.058586	0.058586
	0.042491	0.042491	0.042491
	-0.022332	-0.022332	-0.022332
	0.10063	0.10063	0.10063
	0.082245	0.082245	0.082245
	-0.014606	-0.014606	-0.014606
	0.016457	0.016457	0.016457
	-0.05758	-0.05758	-0.05758
	-0.079469	-0.079469	-0.079469
	0.02712	0.02712	0.02712
	0.031264	0.031264	0.031264
	0.13347	0.13347	0.13347
	0.21966	0.21966	0.21966
	0.063374	0.063374	0.063374
	-0.017222	-0.017222	-0.017222
	-0.091701	-0.091701	-0.091701
	-0.22235	-0.22235	-0.22235
	-0.16831	-0.16831	-0.16831
	-0.20525	-0.20525	-0.20525
	-0.28259	-0.28259	-0.28259
	-0.13886	-0.13886	-0.13886
	-0.07283	-0.07283	-0.07283
	-0.051343	-0.051343	-0.051343
	0.071421	0.071421	0.071421
	0.21853	0.21853	0.21853
	0.352	0.352	0.352
	0.30753	0.30753	0.30753
	0.16727	0.16727	0.16727
	0.24943	0.24943	0.24943
	0.28999	0.28999	0.28999
	0.015934	0.015934	0.015934
	-0.088281	-0.088281	-0.088281
	0.020561	0.020561	0.020561
	0.029454	0.029454	0.029454
	-0.01525	-0.01525	-0.01525
	-0.05424	-0.05424	-0.05424
	0.024102	0.024102	0.024102
	0.013721	0.013721	0.013721
	-0.142	-0.142	-0.142
	-0.14232	-0.14232	-0.14232
	-0.094558	-0.094558	-0.094558
	-0.12168	-0.12168	-0.12168
	-0.1088	-0.1088	-0.1088
	-0.063092	-0.063092	-0.063092
	-0.086752	-0.086752	-0.086752
	-0.15495	-0.15495	-0.15495
	-0.12602	-0.12602	-0.12602
	-0.0080877	-0.0080877	-0.0080877
	-0.03722	-0.03722	-0.03722
	-0.10739	-0.10739	-0.10739
	0.056534	0.056534	0.056534
	0.24927	0.24927	0.24927
	0.25865	0.25865	0.25865
	0.24287	0.24287	0.24287
	0.25052	0.25052	0.25052
	0.19451	0.19451	0.19451
	0.074761	0.074761	0.074761
	-0.061563	-0.061563	-0.061563
	-0.036415	-0.036415	-0.036415
	0.043497	0.043497	0.043497
	-0.073232	-0.073232	-0.073232
	-0.17177	-0.17177	-0.17177
	-0.1418	-0.1418	-0.1418
	-0.15355	-0.15355	-0.15355
	-0.13403	-0.13403	-0.13403
	-0.099386	-0.099386	-0.099386
	-0.15254	-0.15254	-0.15254
	-0.10365	-0.10365	-0.10365
	-0.01871	-0.01871	-0.01871
	-0.056373	-0.056373	-0.056373
	-0.024142	-0.024142	-0.024142
	0.0056735	0.0056735	0.0056735
	0.012755	0.012755	0.012755
	0.1554	0.1554	0.1554
	0.18521	0.18521	0.18521
	0.109	0.109	0.109
	0.1325	0.1325	0.1325
	0.097455	0.097455	0.097455
	0.058103	0.058103	0.058103
	0.088281	0.088281	0.088281
	-0.026999	-0.026999	-0.026999
	-0.11182	-0.11182	-0.11182
	-0.031305	-0.031305	-0.031305
	-0.00080475	-0.00080475	-0.00080475
	0.046152	0.046152	0.046152
	0.07798	0.07798	0.07798
	-0.020923	-0.020923	-0.020923
	-0.031144	-0.031144	-0.031144
	0.010582	0.010582	0.010582
	-0.066875	-0.066875	-0.066875
	-0.038266	-0.038266	-0.038266
	0.020199	0.020199	0.020199
	-0.028448	-0.028448	-0.028448
	0.012675	0.012675	0.012675
	0.0049492	0.0049492	0.0049492
	-0.031868	-0.031868	-0.031868
	0.085303	0.085303	0.085303
	0.068524	0.068524	0.068524
	-0.035852	-0.035852	-0.035852
	0.065506	0.065506	0.065506
	0.085102	0.085102	0.085102
	0.062006	0.062006	0.062006
	0.056091	0.056091	0.056091
	-0.056936	-0.056936	-0.056936
	-0.012997	-0.012997	-0.012997
	0.0020119	0.0020119	0.0020119
	-0.093552	-0.093552	-0.093552
	-0.029132	-0.029132	-0.029132
	0.078382	0.078382	0.078382
	0.02716	0.02716	0.02716
	0.015974	0.015974	0.015974
	0.025631	0.025631	0.025631
	-0.062368	-0.062368	-0.062368
	-0.024344	-0.024344	-0.024344
	-0.041324	-0.041324	-0.041324
	0.0060356	0.0060356	0.0060356
	0.15664	0.15664	0.15664
	0.032633	0.032633	0.032633
	-0.054039	-0.054039	-0.054039
	0.002535	0.002535	0.002535
	0.0070415	0.0070415	0.0070415
	0.022855	0.022855	0.022855
	-0.0076853	-0.0076853	-0.0076853
	-0.05416	-0.05416	-0.05416
	0.0063173	0.0063173	0.0063173
	0.01022	0.01022	0.01022
	-0.066512	-0.066512	-0.066512
	-0.016779	-0.016779	-0.016779
	-0.0011669	-0.0011669	-0.0011669
	-0.054844	-0.054844	-0.054844
	-0.017906	-0.017906	-0.017906
	0.012514	0.012514	0.012514
	0.018067	0.018067	0.018067
	0.018348	0.018348	0.018348
	-0.044221	-0.044221	-0.044221
	-0.090494	-0.090494	-0.090494
	-0.095765	-0.095765	-0.095765
	-0.099628	-0.099628	-0.099628
	-0.010341	-0.010341	-0.010341
	0.10953	0.10953	0.10953
	0.13142	0.13142	0.13142
	0.11182	0.11182	0.11182
	0.14236	0.14236	0.14236
	0.14071	0.14071	0.14071
	0.015813	0.015813	0.015813
	-0.041163	-0.041163	-0.041163
	0.0097374	0.0097374	0.0097374
	0.0017302	0.0017302	0.0017302
	-0.018549	-0.018549	-0.018549
	-0.024625	-0.024625	-0.024625
	-0.047279	-0.047279	-0.047279
	-0.073353	-0.073353	-0.073353
	-0.13069	-0.13069	-0.13069
	-0.12244	-0.12244	-0.12244
	-0.020561	-0.020561	-0.020561
	-0.007967	-0.007967	-0.007967
	-0.03396	-0.03396	-0.03396
	0.052912	0.052912	0.052912
	0.062046	0.062046	0.062046
	-0.022895	-0.022895	-0.022895
	0.017986	0.017986	0.017986
	0.10252	0.10252	0.10252
	0.183	0.183	0.183
	0.21068	0.21068	0.21068
	0.11617	0.11617	0.11617
	0.15013	0.15013	0.15013
	0.21205	0.21205	0.21205
	0.031788	0.031788	0.031788
	-0.054079	-0.054079	-0.054079
	0.035369	0.035369	0.035369
	0.021527	0.021527	0.021527
	-0.032552	-0.032552	-0.032552
	-0.18815	-0.18815	-0.18815
	-0.32174	-0.32174	-0.32174
	-0.17053	-0.17053	-0.17053
	-0.13443	-0.13443	-0.13443
	-0.24661	-0.24661	-0.24661
	-0.15379	-0.15379	-0.15379
	-0.021004	-0.021004	-0.021004
	0.068243	0.068243	0.068243
	0.12924	0.12924	0.12924
	0.057137	0.057137	0.057137
	0.023941	0.023941	0.023941
	0.1599	0.1599	0.1599
	0.13616	0.13616	0.13616
	0.06265	0.06265	0.06265
	0.1453	0.1453	0.1453
	0.11922	0.11922	0.11922
	0.12671	0.12671	0.12671
	0.11327	0.11327	0.11327
	-0.06104	-0.06104	-0.06104
	-0.11303	-0.11303	-0.11303
	-0.070737	-0.070737	-0.070737
	-0.10627	-0.10627	-0.10627
	-0.096449	-0.096449	-0.096449
	-0.048365	-0.048365	-0.048365
	-0.012152	-0.012152	-0.012152
	0.11826	0.11826	0.11826
	0.069892	0.069892	0.069892
	-0.087637	-0.087637	-0.087637
	-0.035007	-0.035007	-0.035007
	-0.037582	-0.037582	-0.037582
	-0.10446	-0.10446	-0.10446
	-0.06788	-0.06788	-0.06788
	-0.074801	-0.074801	-0.074801
	-0.044985	-0.044985	-0.044985
	0.0085303	0.0085303	0.0085303
	-0.10393	-0.10393	-0.10393
	-0.080354	-0.080354	-0.080354
	0.061201	0.061201	0.061201
	0.026034	0.026034	0.026034
	0.073272	0.073272	0.073272
	0.12787	0.12787	0.12787
	0.080877	0.080877	0.080877
	0.14755	0.14755	0.14755
	0.096369	0.096369	0.096369
	-0.0032592	-0.0032592	-0.0032592
	0.092345	0.092345	0.092345
	0.085062	0.085062	0.085062
	0.028287	0.028287	0.028287
	0.10055	0.10055	0.10055
	0.070818	0.070818	0.070818
	0.042169	0.042169	0.042169
	0.066271	0.066271	0.066271
	-0.036898	-0.036898	-0.036898
	-0.082245	-0.082245	-0.082245
	-0.102	-0.102	-0.102
	-0.17415	-0.17415	-0.17415
	-0.086309	-0.086309	-0.086309
	0.0035811	0.0035811	0.0035811
	-0.023941	-0.023941	-0.023941
	0.012795	0.012795	0.012795
	0.028971	0.028971	0.028971
	0.0003219	0.0003219	0.0003219
	0.033035	0.033035	0.033035
	0.036737	0.036737	0.036737
	0.057137	0.057137	0.057137
	0.099869	0.099869	0.099869
	0.058626	0.058626	0.058626
	0.031948	0.031948	0.031948
	0.048768	0.048768	0.048768
	0.0088522	0.0088522	0.0088522
	-0.026758	-0.026758	-0.026758
	-0.0072427	-0.0072427	-0.0072427
	0.026557	0.026557	0.026557
	0.052027	0.052027	0.052027
	0.012514	0.012514	0.012514
	0.0099386	0.0099386	0.0099386
	0.012071	0.012071	0.012071
	-0.047842	-0.047842	-0.047842
	-0.060517	-0.060517	-0.060517
	-0.102	-0.102	-0.102
	-0.12212	-0.12212	-0.12212
	-0.049492	-0.049492	-0.049492
	-0.017785	-0.017785	-0.017785
	0.0017302	0.0017302	0.0017302
	0.04571	0.04571	0.04571
	0.0075244	0.0075244	0.0075244
	0.0033799	0.0033799	0.0033799
	0.058304	0.058304	0.058304
	0.045428	0.045428	0.045428
	0.062931	0.062931	0.062931
	0.063776	0.063776	0.063776
	0.00060356	0.00060356	0.00060356
	0.017383	0.017383	0.017383
	0.020642	0.020642	0.020642
	-0.074882	-0.074882	-0.074882
	-0.083211	-0.083211	-0.083211
	-0.06603	-0.06603	-0.06603
	-0.083774	-0.083774	-0.083774
	0.0042652	0.0042652	0.0042652
	0.01191	0.01191	0.01191
	-0.058344	-0.058344	-0.058344
	-0.011991	-0.011991	-0.011991
	-0.04909	-0.04909	-0.04909
	-0.091097	-0.091097	-0.091097
	0.0080475	0.0080475	0.0080475
	0.003058	0.003058	0.003058
	-0.014968	-0.014968	-0.014968
	0.012635	0.012635	0.012635
	-0.047118	-0.047118	-0.047118
	0.012594	0.012594	0.012594
	0.15367	0.15367	0.15367
	0.12357	0.12357	0.12357
	0.1055	0.1055	0.1055
	0.10739	0.10739	0.10739
	0.010784	0.010784	0.010784
	0.052067	0.052067	0.052067
	0.072588	0.072588	0.072588
	-0.062328	-0.062328	-0.062328
	-0.046434	-0.046434	-0.046434
	-0.0061161	-0.0061161	-0.0061161
	-0.04575	-0.04575	-0.04575
	0.038306	0.038306	0.038306
	0.030902	0.030902	0.030902
	-0.062207	-0.062207	-0.062207
	-0.014003	-0.014003	-0.014003
	-0.010663	-0.010663	-0.010663
	0.017865	0.017865	0.017865
	0.12409	0.12409	0.12409
	0.071341	0.071341	0.071341
	0.027764	0.027764	0.027764
	0.048486	0.048486	0.048486
	-0.04068	-0.04068	-0.04068
	-0.0029776	-0.0029776	-0.0029776
	0.043577	0.043577	0.043577
	-0.039553	-0.039553	-0.039553
	0.073393	0.073393	0.073393
	0.14671	0.14671	0.14671
	0.05259	0.05259	0.05259
	0.068001	0.068001	0.068001
	0.047923	0.047923	0.047923
	-0.021768	-0.021768	-0.021768
	0	0	0
	-0.13854	-0.13854	-0.13854
	-0.18775	-0.18775	-0.18775
	0.016859	0.016859	0.016859
	-0.021326	-0.021326	-0.021326
	-0.092184	-0.092184	-0.092184
	-0.025993	-0.025993	-0.025993
	0.053838	0.053838	0.053838
	0.15745	0.15745	0.15745
	0.09838	0.09838	0.09838
	0.022533	0.022533	0.022533
	0.1694	0.1694	0.1694
	0.16505	0.16505	0.16505
	-0.12144	-0.12144	-0.12144
	-0.15403	-0.15403	-0.15403
	-0.056131	-0.056131	-0.056131
	-0.069409	-0.069409	-0.069409
	-0.14204	-0.14204	-0.14204
	-0.18694	-0.18694	-0.18694
	-0.031948	-0.031948	-0.031948
	0.030661	0.030661	0.030661
	-0.056614	-0.056614	-0.056614
[truncated: 63,536 more rows]
