# Supplementary material for: Fault Characteristic Extraction by Fractional Lower-Order Bispectrum Methods
Source: Hindawi journal article supplement (doi:10.1155/2020/8823389), 2020-12-31
Supplement: f1 [file 8823389.f1.zip › 8823389.f1/normal signals.txt]

X097RPM	X222_BA_time	X222_DE_time
1796	0.053197	0.14567
	0.088662	0.097796
	0.099718	0.054856
	0.058621	0.036982
	-0.0045895	0.054445
	-0.056952	0.021162
	-0.071764	-0.0036982
	-0.058621	-0.010684
	-0.046521	0.02938
	-0.049859	0.10458
	-0.051111	0.13581
	-0.015646	0.12451
	0.045895	0.06102
	0.092208	-0.0036982
	0.091791	-0.027736
	0.060498	-0.0049309
	0.024408	0.0049309
	-0.00020862	-0.0055473
	0.017524	-0.013149
	0.026286	-0.0034927
	-0.0035465	0.048282
	-0.041097	0.091427
	-0.062376	0.09266
	-0.032544	0.042529
	0.0050068	-0.012738
	0.02858	-0.063896
	0.043809	-0.061431
	0.040889	-0.054445
	0.055283	-0.081565
	0.085324	-0.078484
	0.10848	-0.076429
	0.099092	-0.0053418
	0.05883	0.072525
	0.031501	0.10745
	0.01961	0.088345
	0.029415	-0.0096564
	0.06029	-0.076635
	0.075727	-0.098824
	0.066966	-0.10375
	0.059038	-0.10047
	0.064045	-0.082387
	0.070095	-0.062869
	0.0678	-0.0047255
	0.044435	0.092249
	0.02107	0.1582
	0.017315	0.17114
	0.041306	0.10848
	0.096589	0.0088345
	0.14082	-0.063485
	0.15041	-0.098207
	0.13998	-0.12101
	0.12016	-0.11814
	0.099092	-0.10745
	0.081569	-0.07458
	0.051945	0.02712
	0.0060498	0.12882
	-0.038177	0.18368
	-0.051737	0.16169
	-0.021487	0.09492
	0.020653	0.026915
	0.044852	-0.02034
	0.058621	-0.016231
	0.065922	-0.010684
	0.071764	-0.014382
	0.07239	-0.0047255
	0.031084	0.059171
	-0.039846	0.15389
	-0.12475	0.23052
	-0.18316	0.25887
	-0.17336	0.21347
	-0.13623	0.16005
	-0.065297	0.12553
	0.0045895	0.10786
	0.058204	0.113
	0.098675	0.10108
	0.07239	0.084647
	0.01815	0.11752
	-0.061333	0.17587
	-0.14895	0.24572
	-0.19589	0.28086
	-0.1986	0.2412
	-0.13351	0.18655
	-0.048607	0.12512
	0.030249	0.082182
	0.082403	0.080333
	0.10911	0.070471
	0.1258	0.060815
	0.091791	0.071087
	0.03463	0.10951
	-0.044435	0.18902
	-0.11077	0.23812
	-0.12746	0.23401
	-0.1066	0.18409
	-0.046313	0.099235
	0.005424	0.032051
	0.040263	-0.010684
	0.086367	-0.04068
	0.12496	-0.086907
	0.13497	-0.10499
	0.098466	-0.083825
	0.020236	-0.03616
	-0.069886	0.044995
	-0.13122	0.078689
	-0.13393	0.059376
	-0.083863	0.017669
	0.0010431	-0.029585
	0.062585	-0.069855
	0.10097	-0.10375
	0.14436	-0.1506
	0.16835	-0.19354
	0.15458	-0.19683
	0.084489	-0.16272
	-0.021905	-0.061431
	-0.1089	0.036365
	-0.13247	0.087318
	-0.098258	0.095742
	-0.035256	0.056089
	0.050902	0.012533
	0.12997	-0.023627
	0.18546	-0.059376
	0.21779	-0.1056
	0.20966	-0.12204
	0.16105	-0.093482
	0.08741	-0.0080127
	0.011682	0.094098
	-0.04068	0.13581
	-0.035047	0.1356
	0.0091791	0.10006
	0.045687	0.067595
	0.07677	0.057116
	0.097632	0.052802
	0.11495	0.031229
	0.1356	-0.0047255
	0.11703	-0.026298
	0.061124	-0.010067
	-0.018775	0.039036
	-0.088662	0.076018
	-0.096589	0.10396
	-0.070929	0.089578
	-0.024825	0.075607
	0.025868	0.07684
	0.053197	0.061636
	0.071972	0.035749
	0.08282	-0.028764
	0.078022	-0.065745
	0.044644	-0.070265
	-0.027329	-0.047255
	-0.11891	-0.016847
	-0.17691	-0.0036982
	-0.17878	-0.0024655
	-0.14812	-0.028558
	-0.092834	-0.025887
	-0.03922	-0.022395
	0.0014603	-0.033489
	0.043809	-0.066567
	0.080734	-0.098413
	0.075727	-0.095947
	0.018984	-0.071909
	-0.061124	-0.012327
	-0.13456	0.027531
	-0.16877	0.062458
	-0.15563	0.076429
	-0.12767	0.086702
	-0.10222	0.10827
	-0.070512	0.090195
	-0.049233	0.065335
	-0.035465	0.0113
	-0.043392	-0.041502
	-0.075727	-0.044995
	-0.11808	-0.0080127
	-0.16126	0.044378
	-0.16397	0.09492
	-0.11912	0.12348
	-0.046313	0.13149
	0.017524	0.15121
	0.051945	0.1469
	0.073433	0.11814
	0.086367	0.071087
	0.074893	0.015204
	0.054031	-0.0092455
	0.010639	-0.0041091
	-0.042558	0.018696
	-0.053614	0.0452
	-0.041723	0.064307
	-0.0098049	0.064924
	0.017315	0.091016
	0.044644	0.13005
	0.073641	0.13231
	0.093042	0.11177
	0.12496	0.039858
	0.1331	-0.036776
	0.10744	-0.073758
	0.05883	-0.084853
	0.016063	-0.072731
	0.016063	-0.059171
	0.052988	-0.03842
	0.085324	-0.0020545
	0.10014	0.025065
	0.10598	0.036365
	0.10326	0.023833
	0.093877	-0.037393
	0.061542	-0.087729
	0.014603	-0.10273
	-0.053406	-0.091222
	-0.11891	-0.056705
	-0.13706	-0.04068
	-0.094503	-0.026504
	-0.020653	0.0057527
	0.035465	0.039036
	0.085532	0.069444
	0.13205	0.087935
	0.16251	0.051158
	0.15938	-0.014793
	0.11975	-0.038625
	0.059873	-0.046227
	-0.021696	-0.024244
	-0.088453	0.0094509
	-0.11328	0.021778
	-0.097841	0.058965
	-0.058204	0.11382
	-0.021487	0.16251
	0.01961	0.18142
	0.062167	0.15121
	0.086158	0.08362
	0.091791	0.032051
	0.063419	0.00904
	0.012308	0.012327
	-0.021905	0.038831
	-0.037759	0.071293
	-0.040263	0.10581
	-0.03922	0.14115
	-0.039846	0.18059
	-0.042766	0.17936
	-0.036508	0.13375
	-0.022322	0.049515
	-0.019818	-0.026093
	-0.033378	-0.052185
	-0.066131	-0.0339
	-0.095963	0.024449
	-0.10598	0.069033
	-0.086575	0.10088
	-0.042975	0.11218
	-0.022739	0.13087
	-0.0083446	0.13889
	0.023991	0.094509
	0.056743	0.033695
	0.08136	-0.047255
	0.065297	-0.087729
	0.01502	-0.084236
	-0.034839	-0.057938
	-0.06321	-0.031229
	-0.045478	-0.029175
	0.0062585	-0.02486
	0.057578	0.0094509
	0.088453	0.068827
	0.095963	0.094098
	0.1066	0.10314
	0.12788	0.066978
	0.12809	0.027736
	0.10139	0.01808
	0.056535	0.019518
	0.015438	0.031229
	0.014812	-0.0057527
	0.058204	-0.032667
	0.092417	-0.050542
	0.10055	-0.037598
	0.10222	-0.011916
	0.10952	-0.010478
	0.13873	-0.015204
	0.15876	-0.041913
	0.14582	-0.039447
	0.098049	-0.037804
	0.034422	-0.016642
	-0.0085532	-0.021162
	-0.021905	-0.076429
	-0.02107	-0.093687
	-0.015855	-0.091222
	-0.011265	-0.059171
	-0.002712	-0.036982
	0.036299	-0.06102
	0.088662	-0.10869
	0.12433	-0.13437
	0.11432	-0.11074
	0.070721	-0.062253
	0.01502	-0.02034
	-0.028163	-0.021573
	-0.0085532	-0.041091
	0.026703	-0.056911
	0.032753	-0.046433
	0.028163	-0.038009
	0.028372	-0.052391
	0.053823	-0.066156
	0.076562	-0.074991
	0.059038	-0.040269
	0.014186	0.016847
	-0.038802	0.084647
	-0.059038	0.11321
	-3.86E-02	1.04E-01
	-0.0089705	0.084853
	0.0012517	0.070676
	-0.012934	0.094509
	-0.022739	0.084236
	-0.010848	0.071704
	0.021696	0.064513
	0.034213	0.071293
	0.0039637	0.12492
	-0.050276	0.16991
	-0.091165	0.18922
	-0.08595	0.17135
	-0.071346	0.12861
	-0.06321	0.10684
	-0.059873	0.11444
	-0.073433	0.11485
	-0.066757	0.11362
	-0.036299	0.090811
	-0.005424	0.071498
	0.011265	0.10108
	-0.0047982	0.15121
	-0.03171	0.1995
	-0.038385	0.19148
	-0.021905	0.14341
	-0.00062585	0.095125
	0.012517	0.063691
	0.022739	0.055473
	0.041097	0.039242
	0.068009	0.01582
	0.084906	-0.00020545
	0.095963	0.020545
	0.0799	0.087524
	0.015229	0.15717
	-0.038594	0.18779
	-0.038385	0.15265
	-0.0050068	0.083415
	0.017315	0.044378
	0.014603	0.017258
	0.029415	-0.0057527
	0.065922	-0.02486
	0.095129	-0.043556
	0.11724	-0.028969
	0.10577	0.030818
	0.069678	0.12204
	0.03171	0.18327
	0.012308	0.17916
	0.037134	0.11588
	0.055909	0.044995
	0.045478	0.012327
	0.032753	-0.018696
	0.032753	-0.053418
	0.043392	-0.07684
	0.043183	-0.09266
	0.042349	-0.044584
	0.031501	0.041913
	-0.0022948	0.10971
	-0.016898	0.14176
	0.008136	0.10088
	0.04214	0.057527
	0.063836	0.035133
	0.075102	0.013765
	0.072598	0.0082182
	0.086993	-0.027325
	0.10368	-0.066773
	0.091791	-0.076635
	0.041723	-0.054035
	-0.041097	0.0069855
	-0.097215	0.043351
	-0.10285	0.037804
	-0.072807	0.010889
	-0.032961	-0.0073964
	-0.0045895	0.0026709
	0.010848	0.020545
	0.036299	0.021778
	0.070929	-0.021778
	0.08595	-0.069444
	0.076353	-0.079305
	0.037968	-0.050336
	-0.023574	-0.0047255
	-0.063836	-0.0026709
	-0.056326	-0.023833
	-0.03171	-0.02712
	-0.019193	-0.0080127
	-0.023156	0.0339
	-0.026494	0.053418
	-0.0085532	0.031435
	0.041306	-0.0043145
	0.068009	-0.035338
	0.046104	-0.012944
	0.0077188	0.042118
	-0.016689	0.052802
	0.0073015	0.044789
	0.043809	0.042529
	0.071346	0.058349
	0.084489	0.098618
	0.070512	0.13211
	0.069469	0.13005
	0.089496	0.068211
	0.10431	-0.0034927
	0.077396	-0.032873
	0.0052154	-0.017258
	-0.043809	0.021162
	-0.061333	0.030407
	-0.036925	0.024244
	0.0045895	0.025682
	0.014603	0.06328
	0.014394	0.11588
	-0.018984	0.11855
	-0.025242	0.062664
	-0.0012517	-0.021367
	-0.0095963	-0.076635
	-0.03317	-0.093276
	-0.073224	-0.06554
	-0.081986	-0.046638
	-0.042975	-0.037393
	0	-0.020545
	0.022739	0.017464
	0.0091791	0.08136
	-0.027954	0.11115
	-0.05278	0.089784
	-0.041932	-0.0026709
	-0.011057	-0.082593
	-0.0095963	-0.13704
	-0.023991	-0.1317
	-0.013769	-0.078689
	0.024825	-0.061636
	0.078857	-0.029585
	0.1016	0.0092455
	0.10118	0.088551
	0.070929	0.16765
	0.024199	0.19518
	0.0043809	0.15019
	0.012517	0.05424
	0.042975	-0.012122
	0.026286	-0.049925
	-0.0089705	-0.028764
	-0.014186	-0.025065
	-0.00041723	-0.046227
	0.020236	-0.020135
	0.0014603	0.021984
	-0.046521	0.091838
	-0.10014	0.13786
	-0.12413	0.13293
	-0.097423	0.1017
	-0.060081	0.03842
	-0.047773	-0.00041091
	-0.056743	0.0016436
	-0.06634	-0.0051364
	-0.061542	-0.034105
	-0.039428	-0.066773
	-0.026286	-0.061636
	-0.050068	0.019107
	-0.10681	0.10478
	-0.16648	0.14156
	-0.17983	0.10745
	-0.14624	0.021984
	-0.11182	-0.034105
	-0.067174	-0.063485
	-0.041306	-0.058349
	-0.018358	-0.064718
	0.025868	-0.066567
	0.054031	-0.033489
	0.064045	0.031229
	0.0083446	0.12779
	-0.074267	0.17649
	-0.10973	0.18963
	-0.10869	0.13539
	-0.078022	0.053829
	-0.040889	0.024038
	-0.0045895	-0.011095
	0.03317	-0.031845
	0.069469	-0.033078
	0.094711	-0.036982
	0.094086	0.0084236
	0.068634	0.090811
	0.013351	0.15799
	-0.026494	0.18244
	-0.014394	0.13252
	0.021696	0.046022
	0.065297	-0.0092455
	0.083446	-0.044378
	0.094711	-0.062253
	0.10765	-0.066156
	0.11286	-0.074169
	0.12976	-0.052596
	0.11036	0.0016436
	0.063628	0.088962
	0.0121	0.16169
	-0.010431	0.16231
	0.02107	0.11238
	0.056952	0.057527
	0.099092	0.013765
	0.13205	-0.029791
	0.15876	-0.056295
	0.19213	-0.10601
	0.18442	-0.1395
	0.15208	-0.088551
	0.089287	-0.0012327
	0.0047982	0.088962
	-0.037134	0.13889
	-0.041723	0.11115
	-0.0035465	0.053418
	0.04214	0.00452
	0.063628	-0.037804
	0.074684	-0.059376
	0.089287	-0.10067
	0.11891	-0.1393
	0.11057	-0.1169
	0.065714	-0.051775
	0.0045895	0.050336
	-0.054449	0.13334
	-0.066966	0.15121
	-0.048607	0.11156
	-0.0022948	0.06328
	0.049233	0.016025
	0.077396	-0.028147
	0.096589	-0.047665
	0.098258	-0.096769
	0.083863	-0.099235
	0.03609	-0.053213
	-0.037759	0.0071909
	-0.093877	0.095331
	-0.11766	0.1169
	-0.089496	0.10458
	-0.025868	0.076429
	0.048399	0.050542
	0.11224	0.050542
	0.14499	0.032462
	0.16981	-0.013765
	0.16293	-0.067595
	0.1089	-0.081155
	0.02107	-0.0452
	-0.082403	0.037393
	-0.13915	0.098207
	-0.13706	0.099235
	-0.096172	0.079922
	-0.046313	0.047049
	-0.00083446	0.026504
	0.032753	0.013149
	0.04819	-0.036365
	0.064045	-0.08362
	0.057161	-0.092044
	0.0073015	-0.075607
	-0.064254	0.0039036
	-0.12809	0.080538
	-0.15938	0.094509
	-0.14457	0.093276
	-0.089913	0.064513
	-0.022322	0.048282
	0.03463	0.050953
	0.07677	0.0113
	0.1089	-0.046022
	0.12079	-0.097591
	0.092834	-0.11156
	0.027954	-0.055884
	-0.071764	0.019518
	-0.14123	0.068827
	-0.13769	0.09266
	-0.10639	0.10704
	-0.040054	0.12101
	0.025034	0.13663
	0.081569	0.13437
	0.14791	0.092249
	0.17399	0.04294
	0.1671	0.0063691
	0.10931	-0.0071909
	0.01356	0.024655
	-0.050485	0.057527
	-0.074893	0.073964
	-0.055492	0.09266
	-0.028372	0.11156
	0.0098049	0.14197
	0.056535	0.16231
	0.068634	0.15245
	0.096589	0.093482
	0.099927	0.011505
	0.062793	-0.036571
	0.0064671	-0.053213
	-0.065088	-0.046022
	-0.074684	-0.025682
	-0.060916	0.0055473
	-0.035465	0.03616
	0.016481	0.084647
	0.054449	0.14259
	0.098675	0.15142
	0.1356	0.10355
	0.15333	0.0078073
	0.13456	-0.078278
	0.07385	-0.1093
	0.022739	-0.095331
	-0.015646	-0.059787
	-0.022948	0.0043145
	-0.0060498	0.063691
	0.0077188	0.10992
	0.02712	0.1621
	0.051319	0.15676
	0.094294	0.1206
	0.12079	0.049309
	0.11161	-0.043556
	0.084698	-0.073347
	0.017315	-0.068211
	-0.042766	-0.031845
	-0.061124	0.020545
	-0.040263	0.056911
	0.0022948	0.10375
	0.0121	0.16436
	0.019401	0.19046
	0.041097	0.17381
	0.05278	0.1167
	0.04673	0.022189
	0.014812	-0.041707
	-0.033587	-0.0565
	-0.086784	-0.031024
	-0.1114	0.010067
	-0.084698	0.054651
	-0.045478	0.10355
	-0.023365	0.16272
	-0.019818	0.20525
	-0.0016689	0.1808
	0.035673	0.11814
	0.063419	0.018285
	0.093251	-0.041502
	0.061124	-0.061842
	-0.0093877	-0.071087
	-0.035047	-0.02034
	-0.03171	0.012327
	0.0093877	0.039242
	0.038594	0.087318
	0.050694	0.13457
	0.067383	0.14505
	0.066131	0.12409
	0.084072	0.058349
	0.097632	-0.016025
	0.073224	-0.030202
	0.008136	-0.053829
	-0.062585	-0.025271
	-0.086367	0.0098618
	-0.065297	0.026093
	-0.021279	0.073964
	0.014186	0.10334
	0.028372	0.12101
	0.032753	0.09718
	0.048816	0.041502
	0.076979	-0.033284
	0.077188	-0.056911
	0.028163	-0.063485
	-0.030041	-0.04294
	-0.064254	0.0032873
	-0.071764	-0.022805
	-0.050276	0.016847
	-0.040889	0.050542
	-0.053823	0.067595
	-0.049859	0.097796
	-0.017524	0.050953
	0.030249	-0.00020545
	0.078648	-0.039242
	0.10222	-0.041091
	0.065714	-0.0010273
	0.0095963	0.060609
	-0.017524	0.070471
	-0.012517	0.086907
	0.0025034	0.11095
	0.013143	0.095742
	0.028163	0.11218
	0.049233	0.069649
	0.099301	0.027942
	0.15375	-0.0036982
	0.1744	-0.020545
	0.12809	0.0096564
	0.02858	0.041913
	-0.049442	0.056089
	-0.082612	0.048076
	-0.073641	0.067389
	-0.059247	0.0565
	-0.044435	0.079716
	-0.010431	0.057116
	0.027746	-0.028558
	0.080526	-0.071498
	0.11703	-0.12594
	0.09346	-0.098002
	0.028163	-0.029791
	-0.050902	0.020135
	-0.09951	0.058555
	-0.094294	0.058965
	-0.07531	0.049309
	-0.065297	0.043351
	-0.047564	0.025476
	-0.011265	-0.027325
	0.044852	-0.079716
	0.08595	-0.13005
	0.090748	-0.12779
	0.060707	-0.064307
	0.0089705	-0.014587
	-0.017524	0.0065745
	-0.020653	0.015615
	-0.017315	0.0086291
	-0.01356	-0.0092455
	-0.0066757	0.0063691
	0.016689	-0.02938
	0.051111	-0.083825
	0.1016	-0.11177
	0.15208	-0.13129
	0.13915	-0.060404
	0.073015	0.011095
	-0.0012517	0.059993
	-0.049859	0.083209
	-0.064879	0.064718
	-0.081151	0.066156
	-0.080317	0.058555
	-0.073433	0.043351
	-0.05883	-0.0030818
	-0.005424	-0.061636
	0.063628	-0.092044
	0.081777	-0.05424
	0.042349	0.026915
	-0.0016689	0.06554
	-0.052154	0.080333
	-0.071138	0.048693
	-0.069052	0.0071909
	-0.079691	0.0028764
	-0.060916	0.0010273
	-0.036925	-0.017464
	0.0085532	-0.034516
	0.06321	-0.054651
	0.077396	-0.034516
	0.074058	0.047049
	0.024199	0.094304
	-0.014812	0.13087
	-0.020653	0.11505
	-0.016481	0.072525
	-0.00020862	0.081771
	-0.016481	0.069033
	-0.020027	0.058144
	-0.010431	0.022189
	0.0075102	-0.022395
	0.03171	-0.019107
	0.027954	0.011711
	0.011057	0.069444
	-0.016063	0.10786
	-0.025034	0.10314
	-0.015646	0.059787
	-0.0079274	0.048693
	-0.011891	0.069855
	-0.035465	0.087318
	-0.03463	0.10108
	-0.0043809	0.057527
	0.029415	0.017258
	0.059873	0.00452
	0.059664	0.02034
	0.044018	0.065129
	0.02712	0.069238
	-0.0050068	0.038009
	-0.0098049	0.02938
	-0.013143	0.054445
	-0.030249	0.079305
	-0.02712	0.098824
	-0.0035465	0.050747
	0.061333	-0.010684
	0.11057	-0.02034
	0.11328	0.0018491
	0.076145	0.068005
	0.028789	0.081771
	0.018775	0.047665
	0.033587	0.018696
	0.045687	0.024244
	0.01961	0.052185
	0.0037551	0.069649
	0.011891	0.069855
	0.040263	0.013765
	0.075102	-0.021573
	0.068217	-0.035749
	0.052988	-0.018491
	0.01961	0.020545
	-0.00020862	0.0086291
	0.0039637	-0.012944
	0.0020862	-0.024449
	0.0062585	0.0016436
	-0.014186	0.044789
	-0.027746	0.062458
	-0.019818	0.028764
	0.0095963	-0.018491
	0.038594	-0.035338
	0.025242	-0.023833
	0.0079274	0.013971
	-0.014812	0.0026709
	-0.027329	-0.024038
	-0.010639	-0.03164
	0.0058412	-0.016025
	0.011891	0.039653
	-0.010014	0.072115
	-0.017524	0.070676
	0.01815	0.032462
	0.048816	-0.00061636
	0.064254	-0.012944
	0.042766	0.00082182
	0.0091791	0.016642
	-0.017106	-0.0018491
	-0.038177	-0.01356
	-0.026911	-0.017875
	-0.035673	0.033695
	-0.056118	0.10334
	-0.059038	0.12923
	-0.042558	0.10622
	-0.0037551	0.054035
	0.020444	0.0055473
	0.03317	-0.0014382
	0.025868	0.02034
	0.0066757	-0.014382
	0.0070929	-0.024655
	0.0052154	-0.037393
	-0.015646	-0.018285
	-0.061959	0.057527
	-0.1139	0.079305
	-0.11662	0.091016
	-0.084489	0.04746
	-0.037968	-0.0047255
	0.0075102	-0.030202
	0.02858	-0.03616
	0.04214	-0.03616
	0.053197	-0.058555
	0.056952	-0.060404
	0.045478	-0.041296
	0.019818	0.034927
	-0.010014	0.096358
	-0.019401	0.12451
	-0.0066757	0.092249
	0.034839	0.0053418
	0.077188	-0.042735
	0.080734	-0.062253
	0.074267	-0.056911
	0.06175	-0.073142
	0.062376	-0.077045
	0.074893	-0.068416
	0.073433	-0.014176
	0.065297	0.070471
	0.046104	0.10643
	0.03317	0.1167
	0.037551	0.050542
	0.033796	-0.0094509
	0.034213	-0.039242
	0.043809	-0.055884
	0.052571	-0.044584
	0.064462	-0.046227
	0.079691	-0.037598
	0.078648	0.0024655
	0.024408	0.083004
	-0.039846	0.15368
	-0.065297	0.16519
	-0.056743	0.09944
	-0.016481	0.027325
	0.022113	-0.028764
	0.059455	-0.060815
	0.080526	-0.045816
	0.086784	-0.041296
	0.11432	-0.023011
	0.11474	0.0080127
	0.077188	0.077251
	0.0020862	0.15286
	-0.06321	0.18306
	-0.074267	0.18676
	-0.065505	0.13108
	-0.018775	0.087318
	0.010014	0.060815
	0.020236	0.028764
	0.056326	0.015204
	0.070512	-0.0071909
	0.081777	-0.010889
	0.051528	0.030818
	-0.016063	0.099645
	-0.071346	0.16128
	-0.12058	0.18285
	-0.09951	0.13642
	-0.063419	0.078689
	-0.030249	0.041091
	-0.00041723	0.014382
	0.0016689	0.024038
	0.027746	0.014587
	0.020236	-0.0012327
	0.016063	0.0082182
	-0.0041723	0.050336
	-0.074893	0.12718
	-0.11662	0.16909
	-0.13164	0.14074
	-0.084489	0.072731
	-0.036299	0.024038
	-0.016898	-0.022189
	0.023782	-0.035955
	0.065714	-0.031229
	0.11453	-0.044584
	0.12788	-0.021778
	0.10869	0.013971
	0.04214	0.091838
	-0.058204	0.15861
	-0.093877	0.15491
	-0.086993	0.10971
	-0.035465	0.030818
	0.035465	-0.030818
	0.07385	-0.044995
	0.11662	-0.028147
	0.14958	-0.047255
	0.16522	-0.050542
	0.13998	-0.017464
	0.062793	0.037804
	-0.013769	0.13067
	-0.074893	0.14649
	-0.07677	0.11444
	-0.034004	0.062253
	0.02253	-0.021162
	0.095129	-0.048282
	0.13393	-0.051158
	0.15646	-0.070676
	0.16147	-0.073964
	0.14228	-0.058144
	0.092208	-0.011505
	0	0.068005
	-0.082612	0.11526
	-0.12183	0.10314
	-0.085115	0.051775
	-0.0095963	-0.013149
	0.068009	-0.061431
	0.13393	-0.067595
	0.1767	-0.055678
	0.20674	-0.049104
	0.18859	-0.039858
	0.15438	-0.025065
	0.10201	0.041296
	0.01356	0.11095
	-0.034839	0.13005
	-0.04068	0.11279
	0.0020862	0.05198
	0.058412	-0.0032873
	0.093877	-0.015409
	0.13331	-0.013971
	0.14436	-0.011505
	0.14582	-0.00020545
	0.12225	-0.010067
	0.063419	0.016847
	-0.011682	0.068416
	-0.092417	0.078689
	-0.12267	0.084442
	-0.10994	0.035544
	-0.056118	-0.0032873
	0.010848	-0.00020545
	0.064045	-0.012327
	0.11808	0.0024655
	0.13205	0.0010273
	0.097841	-0.013355
	0.039846	-0.012122
	-0.053614	0.016847
	-0.14958	0.046433
	-0.19818	0.060815
	-0.184	0.053829
	-0.11975	0.0018491
	-0.05883	-0.0082182
	0.0018775	-0.0063691
	0.050694	-0.0014382
	0.083655	0.00226
	0.098049	-0.027736
	0.058412	-0.039036
	-0.011891	-0.028969
	-0.1016	-0.013355
	-0.15083	0.0098618
	-0.14394	0.036776
	-0.11119	0.028764
	-0.057578	0.030202
	-0.011891	0.02034
	0.028789	0.010478
	0.045895	0.017464
	0.060707	-0.022805
	0.066966	-0.045816
	0.018984	-0.034722
	-0.060498	0.011505
	-0.14082	0.073142
	-0.17336	0.11505
	-0.15041	0.10704
	-0.10222	0.081155
	-0.03922	0.06328
	0.015646	0.033284
	0.03317	0.046433
	0.042975	0.0069855
	0.055283	-0.039447
	0.016272	-0.03164
	-0.057995	-0.037598
	-0.12496	0.0063691
	-0.16126	0.047255
	-0.14019	0.053829
	-0.083446	0.073964
	-0.021905	0.095125
	0.032753	0.10807
	0.055283	0.11423
	0.070929	0.080127
	0.092625	0.018902
	0.080317	-0.0084236
	0.047773	-0.016642
	-0.0068843	0.016231
	-0.071138	0.066773
	-0.08887	0.083209
	-0.062167	0.087729
	-0.016481	0.089373
	0.032335	0.090811
	0.063836	0.086702
	0.084906	0.057116
	0.089287	-0.019724
	0.078022	-0.079716
	0.056743	-0.11896
	0.0060498	-0.10766
	-0.046104	-0.041502
	-0.088036	-0.011095
	-0.094294	0.052391
	-0.062167	0.089167
	-0.038385	0.091222
	-0.022113	0.10375
	0.0022948	0.058349
	0.033378	-0.0061636
	0.054449	-0.064513
	0.061959	-0.10663
	0.030875	-0.097796
	-0.012934	-0.036365
	-0.041097	0.0092455
	-0.063628	0.040475
	-0.040889	0.064307
	0.008136	0.062869
	0.04965	0.085264
	0.074893	0.085469
	0.10452	0.033284
	0.15187	-0.016025
	0.16022	-0.049925
	0.13477	-0.05424
	0.085115	-0.0026709
	0.01502	0.050131
	-0.029623	0.083825
	-0.040263	0.10643
	-0.015229	0.096564
	0.012308	0.11937
	0.033796	0.13046
	0.069052	0.089578
	0.098884	0.061431
	0.12392	0.023422
	0.10911	-0.00082182
	0.059247	0.034311
	-0.0077188	0.079922
	-0.075936	0.088962
	-0.080943	0.10704
	-0.068009	0.11711
	-0.060707	0.13765
	-0.04068	0.16272
	-0.021279	0.12471
	0.02253	0.075813
	0.060707	0.010684
	0.086784	-0.040064
	0.071555	-0.038009
	0.0041723	0.0018491
	-0.052362	0.03616
	-0.09492	0.051364
	-0.090539	0.053418
	-0.068426	0.052596
	-0.049233	0.084647
	-0.010639	0.082798
	0.031918	0.065335
	0.097215	0.034722
	0.13018	-0.0043145
	0.12788	0.00678
	0.086158	0.042118
	5.22E-03	0.077251
	-0.034839	0.083004
	-0.057369	0.08814
	-0.045478	0.064102
	-0.020236	0.067389
	-0.016689	0.081771
	0.018358	0.04294
	0.069678	0.030613
	0.11975	-0.026709
	0.14123	-0.04746
	0.10535	-0.02034
	0.030249	0.0010273
	-0.039428	0.035544
	-0.067383	0.023422
	-0.057995	0.0020545
	-0.040889	-0.0034927
	-0.036299	0.00904
	-0.02712	-0.0024655
	0.0020862	-0.011711
	0.043183	-0.040475
	0.087201	-0.058555
	0.097423	-0.010684
	0.048607	0.028558
	-0.0022948	0.067389
	-0.021696	0.058965
	-0.0022948	0.020751
	0.029415	-0.00041091
	0.042349	0.023216
	0.036299	0.038625
	0.026077	0.032462
	0.05883	0.0078073
	0.1018	-0.068416
	0.11975	-0.067595
	0.10389	-0.053007
	0.05278	-0.019929
	1.23E-02	1.15E-02
	-0.0052154	-0.015204
	0.0098049	-0.012327
	0.044435	-0.0096564
	0.052571	-0.0055473
	0.052362	-0.0018491
	0.071764	-0.02034
	0.10097	-0.072525
	0.1162	-0.076429
	0.10598	-0.05198
	0.055283	-0.0086291
	-0.03171	0.046844
	-0.066548	0.025682
	-0.050068	0.014998
	-0.022113	0.0069855
	-0.0066757	0.0047255
	-0.010848	0.010684
	0.016898	-0.016231
	0.034213	-0.065745
	0.05424	-0.088345
	0.074058	-0.071293
	0.031292	-0.033489
	-0.025868	0.050747
	-0.063836	0.05876
	-0.06175	0.03842
	-0.024825	0.023216
	0.0012517	-0.019724
	0.008136	0.0020545
	0.0062585	0.0065745
	0.018358	-0.038831
	0.051111	-0.058965
	0.076145	-0.047255
	0.059038	-0.010067
	0.0083446	0.067389
	-0.050276	0.10786
	-0.099301	0.10396
	-0.1235	0.1093
	-0.12329	0.0904
	-0.10911	0.098002
	-0.097215	0.10684
	-0.077188	0.062458
	-0.036925	0.02486
	0.0022948	0.012533
	-0.0033378	0.032667
	-0.045895	0.090605
	-0.087618	0.14752
	-0.10619	0.16251
	-0.098884	0.15471
	-0.074267	0.13313
	-0.04214	0.10807
	-0.04527	0.11053
	-0.059664	0.080333
	-0.041306	0.021367
	-0.015438	-0.0076018
	-0.0014603	0.00452
	-0.016481	0.060815
	-0.063836	0.13478
	-0.12392	0.17875
	-0.13038	0.18162
	-0.071972	0.16662
	-0.03171	0.1432
	-0.0047982	0.15039
	0.019401	0.12861
	0.038385	0.061431
	0.060707	0.027531
	0.059038	-0.0055473
	0.044435	0.012738
	-0.0022948	0.076224
	-0.050694	0.095536
	-0.05424	0.091427
	-0.028789	0.058965
	0.0089705	0.021573
	0.018984	0.02034
	0.03463	0.030613
	0.041306	0.012533
	0.054449	-0.020545
	0.090748	-0.048282
	0.091582	-0.053624
	0.080108	-0.014998
	0.032961	0.0053418
	-0.0020862	-0.0063691
	0.017524	-0.025271
	0.040889	-0.049309
	0.062585	-0.054035
	5.82E-02	-0.022189
	0.036925	-0.0082182
	0.043809	-0.024038
	0.085741	-0.048898
	0.12767	-0.078073
	0.12538	-0.043145
	0.092834	-0.0036982
	0.055492	0.017258
	0.042975	0.022805
	0.075519	-0.01356
	0.10806	-0.013149
	0.12371	0.012327
	0.13018	0.030818
	0.12141	0.035338
	0.12079	-0.0014382
	0.12642	-0.050747
	0.12246	-0.055884
	0.10765	-0.035338
	0.069052	-0.011711
	0.043809	0.0069855
	0.06029	-0.019313
	0.079274	-0.017875
	0.083863	0.033489
	0.076562	0.0791
	0.065922	0.12389
	0.079482	0.11875
	0.10076	0.067389
	0.10973	0.022189
	0.089287	0.0010273
	0.035882	0.0026709
	-0.0039637	-0.0039036
	-0.0045895	-0.036776
	0.0060498	-0.054856
	0.0121	-0.017464
	0.016898	0.038215
	0.0098049	0.10663
	0.012726	0.12697
	0.02858	0.065129
	0.045478	-0.011711
	0.051319	-0.071498
	0.022322	-0.084853
	-0.013351	-0.084853
	-0.037342	-0.094098
	-0.043392	-0.08814
	-0.027954	-0.051775
	-0.021905	0.016025
	-0.024825	0.10417
	-0.02107	0.16005
	-0.0052154	0.13848
	0.025451	0.072936
	0.041097	0.0063691
	0.020653	-0.02938
	-0.012517	-0.0339
	-0.042975	-0.038625
	-0.039846	-0.042118
	-0.020862	-0.019313
	-0.017106	0.025271
	-0.01502	0.094304
	-0.02253	0.15183
	-0.017524	0.13026
	-0.0066757	0.081565
	-0.0043809	0.0098618
	-0.0091791	-0.051364
	-0.032335	-0.051158
	-0.046104	-0.044995
	-0.023156	-0.0226
	0.020862	-0.016231
	0.043601	0.013355
	0.01502	0.08136
	-0.036508	0.14567
	-0.084698	0.18347
	-0.10222	0.14895
	-0.075727	0.094304
	-0.047773	0.035544
	-0.023991	0.011711
	-0.026703	0.0053418
	-0.025034	-0.014382
	-0.0025034	-0.027942
	0.0031292	-0.025682
	0.0085532	0.020751
	-0.01502	0.097796
	-0.037968	0.16642
	-0.03463	0.15265
	-0.011265	0.10252
	0.02858	0.023833
	0.045895	-0.044995
	0.03922	-0.058144
	0.032753	-0.07232
	0.035465	-0.075402
	0.028163	-0.069855
	0.012308	-0.021573
	-0.03171	0.051158
	-0.089705	0.14608
	-0.11745	0.1847
	-0.10389	0.16087
	-0.059247	0.11649
	-0.011265	0.034105
	0.030249	0.0061636
	0.056952	-0.016436
	0.089496	-0.018696
	0.10034	-0.016642
	0.088036	-0.0073964
	0.063628	0.055473
	0.0073015	0.11485
	-0.027537	0.15347
	-0.035882	0.13231
	-0.010848	0.09492
	0.033378	0.040064
	0.071138	0.014793
	0.10827	0.012738
	0.13581	-0.0073964
	0.17628	-0.021573
	0.21216	-0.060404
	0.20507	-0.04972
	0.15208	-0.0051364
	0.080317	0.064307
	0.026286	0.11526
	0.012726	0.11197
	0.037551	0.084853
	0.071138	0.02938
	0.088453	0.0084236
	0.10326	-0.010684
	0.13414	-0.032051
	0.15062	-0.072115
	0.121	-0.086702
	0.057578	-0.050542
	-0.0083446	-0.0014382
	-5.15E-02	6.68E-02
	-0.059038	0.074375
	-0.023991	0.054651
	0.029415	0.015615
	0.075102	-0.022395
	0.096172	-0.042735
	0.11098	-0.074375
	0.14207	-0.09718
	0.13915	-0.11752
	0.10931	-0.082182
	0.056118	-0.0049309
	-0.013769	0.081565
	-0.044852	0.13046
	-0.047564	0.1319
	-0.026911	0.11916
	-0.00083446	0.094509
	0.0085532	0.088962
	0.016898	0.085058
	0.039428	0.071293
	0.074476	0.040269
	0.076145	0.045816
	0.014603	0.077662
	-0.064462	0.11957
	-0.11453	0.16786
	-0.11578	0.15676
	-0.081151	0.14012
	-0.04068	0.12266
	-0.0037551	0.12183
	0.016898	0.13478
	0.025451	0.12738
	0.03317	0.092044
	0.021905	0.038831
	-0.038385	0.032256
	-0.13977	0.043351
	-0.23094	0.078895
	-0.27287	0.11095
	-0.25117	0.10827
	-0.19443	0.1169
	-0.13038	0.12841
	-0.083655	0.13313
	-0.053197	0.11197
	-0.01502	0.043145
	-0.0029206	-0.054035
	-0.025242	-0.10786
	-0.066757	-0.12122
	-0.12204	-0.089784
	-0.16418	-0.031435
	-0.16147	-0.01808
	-0.12204	-0.0055473
	-0.071138	0.0020545
	-0.03463	0.00678
	-0.016689	0.012327
	0.0095963	-0.022805
	0.037134	-0.079305
	0.048399	-0.10869
	0.027954	-0.11444
	-0.026286	-0.098207
	-0.089079	-0.053829
	-0.12663	-0.061842
	-0.12037	-0.067389
	-0.073224	-0.053624
	-0.019818	-0.04294
	0.031084	0.0024655
	0.079274	0.0012327
	0.11912	-0.042324
	0.13456	-0.083209
	0.098466	-0.11259
	0.038385	-0.1091
	-0.042975	-0.061225
	-0.092834	-0.025682
	-0.084906	-0.0057527
	-0.045478	0.024449
	0.021279	0.044995
	0.058204	0.10766
	0.075519	0.13252
	0.095129	0.09718
	0.10848	0.053007
	0.1089	-0.017669
	0.083446	-0.044584
	0.044435	-0.037804
	0.0022948	-0.019313
	-0.012934	0.016847
	0.005424	0.060404
	0.038385	0.1206
	0.071138	0.18922
	0.097841	0.22559
	0.12433	0.18779
	0.14353	0.1167
	0.13289	0.020956
	0.089287	-0.041707
	0.015229	-0.04068
	-0.069886	-0.028147
	-0.1137	0.0076018
	-0.12267	0.043351
	-0.10472	0.074375
	-0.067591	0.12738
	-0.024825	0.15738
	0.01502	0.14361
	0.036925	0.11547
	0.060081	0.035544
	0.061959	-0.03164
	0.026494	-0.042118
	-0.025868	-0.043145
	-0.063419	-0.0024655
	-0.065714	0.024038
	-0.047773	0.041091
	-0.036508	0.088962
	-0.027329	0.12348
	-0.010222	0.13087
	0.010431	0.088551
	0.043601	0.010684
	0.070303	-0.069855
	0.078022	-0.096153
	0.054449	-0.072115
	0.013769	-0.04068
	-0.008136	0.0084236
	-0.0018775	0.036365
	0.023782	0.076224
	0.04214	0.1282
	0.065714	0.13971
	0.094503	0.12142
	0.12684	0.050336
	0.1404	-0.036365
	0.10744	-0.078278
	0.046104	-0.080744
	-0.025034	-0.045816
	-0.065088	0.0047255
	-0.062793	0.042735
	-0.054449	0.09266
	-0.035465	0.13355
	-0.011474	0.14176
	0.01356	0.12533
	0.068634	0.055678
	0.11891	-0.032462
	0.14582	-0.092455
	0.12016	-0.082798
	0.039428	-0.021984
	-0.020653	0.032256
	-0.051528	0.078689
	-0.055283	0.094509
	-0.046104	0.11156
	-0.033378	0.11074
	-0.011057	0.088345
	0.016063	0.052596
	0.066548	-0.024038
	0.099927	-0.053418
	0.097632	-0.02938
	0.058412	0.034105
	-0.0085532	0.10375
	-0.03922	0.12615
	-0.039846	0.13087
	-0.012934	0.10458
	0.0062585	0.083209
	0.0012517	0.070471
	0.021487	0.030818
	0.052154	-0.031229
	0.10264	-0.083825
	0.13977	-0.08588
	0.12183	-0.040269
	0.07677	0.026709
	0.02107	0.054035
	-0.0060498	0.062869
	-0.011057	0.04972
	-0.021487	0.025065
	-0.021905	0.028147
	-0.017524	0.014382
	0.010014	-0.016025
	0.065922	-0.056089
	0.10514	-0.07458
	0.10034	-0.06328
	0.050485	-0.017875
	-0.017524	0.00904
	-0.053823	0.00020545
	-0.053614	-0.019313
	-0.046104	-0.049515
	-0.031084	-0.0226
	-0.010014	-0.019518
	0.027954	-0.040064
	0.068426	-0.069855
	0.096589	-0.10581
	0.10535	-0.089989
	0.053197	-0.056705
	-0.02107	-0.00041091
	-0.080317	0.016231
	-0.1089	0.02486
	-0.10452	0.028558
	-0.097632	0.039242
	-0.083238	0.069444
	-0.063002	0.057116
	-0.0031292	0.038831
	0.07385	0.0057527
	0.12433	0.012533
	1.31E-01	0.058555
	0.076979	0.12183
	0.021696	0.1621
	-0.023156	0.15389
	-0.037759	0.12348
	-0.035047	0.089167
	-0.058621	0.096564
	-0.065505	0.077045
	-0.046938	0.060198
	0.0062585	0.036365
	0.067591	0.02486
	0.086993	0.071909
	0.067591	0.12553
	0.027954	0.1921
	-0.0014603	0.18943
	-0.0039637	0.15491
	0.0121	0.099029
	0.018775	0.050542
	0.0091791	0.041913
	0.012517	-0.0014382
	0.041097	-0.0339
	0.094711	-0.082593
	0.12121	-0.080744
	0.092208	-0.039242
	0.035465	0.0069855
	-0.020862	0.050953
	-0.03609	0.03164
	-0.018775	0.027736
	0.018984	0.014382
	0.0557	0.0030818
	0.080943	-0.0030818
	0.11098	-0.059993
	0.14061	-0.13437
	0.16501	-0.1619
	0.15521	-0.14875
	0.1089	-0.086291
	0.047564	-0.0094509
	-0.0022948	-0.0032873
	-0.017524	-0.0010273
	-0.01815	-0.013971
	-0.023574	-0.0051364
	-0.030249	0.032256
	-0.022739	0.01582
	0.01502	-0.016231
	0.069469	-0.057322
	0.10118	-0.064924
	0.095129	-0.018902
	0.064671	0.04746
	0.032753	0.0904
	0.022322	0.096769
	0.027954	0.0904
	0.021279	0.083825
	0.0025034	0.11567
	0.0035465	0.12553
	0.020236	0.10273
	0.048816	0.084442
	0.063002	0.063691
	0.049442	0.098002
	0.020862	0.17361
	-0.014186	0.21901
	-0.014812	0.22189
	0.0041723	0.18409
	0.025451	0.14443
	0.034839	0.15306
	0.02712	0.15101
	0.02712	0.13026
	0.042766	0.09944
	0.067174	0.045405
	0.074267	0.037598
	0.060707	0.068005
	0.029206	0.1054
	0.0064671	0.11567
	0.0047982	0.099851
	0.0018775	0.092865
	-0.0095963	0.10601
	-0.038385	0.12903
	-0.075519	0.11053
	-0.088662	0.058965
	-0.072807	-0.033078
	-0.056535	-0.098207
	-0.054866	-0.088756
	-0.061542	-0.05876
	-0.052154	-0.0080127
	-0.023991	0.00226
	0.020444	-0.0061636
	0.054449	0.014793
	0.048399	0.036776
	0.01961	0.066156
	-0.0018775	0.067595
	0.008136	0.0024655
	0.025034	-0.075813
	0.01502	-0.10951
	-0.01356	-0.10437
	-0.04068	-0.068211
	-0.061333	-0.0339
	-0.054031	-0.010478
	-0.033378	0.023627
	-0.032753	0.07458
	-0.030875	0.12286
	-0.016898	0.13889
	0.012934	0.10334
	0.060498	0.020956
	0.086993	-0.026504
	0.071346	-0.043556
	0.032335	-0.03164
	0	-0.016025
	0.0050068	-0.029585
	0.023991	-0.0018491
	0.025034	0.034105
	-0.0062585	0.1017
	-0.059873	0.16601
	-0.10076	0.15163
	-0.10994	0.079511
	-0.084698	-0.013971
	-0.056952	-0.07458
	-0.041723	-0.086496
	-0.02858	-0.063075
	-0.002712	-0.062047
	0.035673	-0.058349
	0.047147	-0.041296
	0.034213	-0.0014382
	-0.0058412	0.078484
	-0.04068	0.113
	-0.041514	0.083209
	-0.024199	0.027531
	0.015855	-0.033284
	0.015229	-0.075813
	-0.0022948	-0.078073
	-0.0064671	-0.089578
	-0.0016689	-0.090605
	0.029415	-0.069855
	0.028998	-0.039242
	-0.0016689	0.04746
	-0.040054	0.087524
	-0.059455	0.074785
	-0.04819	0.023422
	-0.025868	-0.069033
	-0.0029206	-0.11095
	0.00083446	-0.11095
	0.010014	-0.096769
	0.041723	-0.095125
	0.085324	-0.098824
	0.1162	-0.073347
	0.10347	0.0065745
	0.0557	0.099029
	0.0033378	0.13807
	-0.030458	0.12615
	-0.031292	0.057527
	-0.0070929	-0.023216
	0.0060498	-0.06554
	0.010639	-0.10293
	0.02858	-0.13498
	0.059455	-0.15717
	0.081151	-0.16025
	0.071764	-0.087935
	0.037968	0.020956
	-0.0095963	0.11259
	-0.026703	0.14752
	-0.0033378	0.097385
	0.035465	0.028558
	0.068009	-0.013149
	0.078857	-0.034105
	0.083863	-0.04746
	0.085741	-0.069033
	0.083655	-0.083209
	0.053823	-0.055884
	-0.013977	0.035749
	-0.096589	0.14197
	-0.16877	0.18737
	-0.17461	0.18244
	-0.14165	0.11444
	-0.095963	0.053418
	-0.045687	0.021984
	-0.020653	-0.011916
	0.0121	-0.0030818
	0.041514	-0.025682
	0.062167	-0.0043145
	0.038594	0.074991
	-0.024199	0.15306
	-0.066757	0.2373
	-0.10952	0.23463
	-0.12705	0.20176
	-0.11641	0.15964
	-0.090122	0.12533
	-0.058204	0.10889
	-0.040889	0.087729
	0.0058412	0.053213
	0.047773	0.0012327
	0.046938	0.024449
	0.016481	0.080538
	-0.04673	0.15656
	-0.098884	0.21244
	-0.11161	0.19107
	-0.077188	0.14176
	-0.016898	0.093276
	0.029623	0.059376
	0.0799	0.021984
	0.11682	-0.017669
	0.12141	-0.076635
	0.090539	-0.07458
	0.0085532	-0.033078
	-0.076562	0.030818
	-0.14895	0.10663
	-0.16731	0.09266
	-0.13435	0.075196
	-0.083446	0.028147
	-0.0052154	-0.014793
	0.047356	-0.032051
	0.093668	-0.082387
	0.12371	-0.13765
	0.13977	-0.1884
	0.13372	-0.17381
	0.060707	-0.12512
	-0.013977	-0.046227
	-0.06321	-0.0088345
	-0.062793	-0.018285
	-0.030249	-0.016642
	0.0037551	-0.047871
	0.056118	-0.028764
	0.10389	-0.012944
	0.14561	-0.041091
	0.17211	-0.063075
	0.15438	-0.091222
	0.10201	-0.082182
	0.038177	-0.037187
	-0.020027	-0.0043145
	-0.045687	0.024449
	-0.034213	0.042735
	0.0079274	0.0339
	0.065922	0.070882
	0.11182	0.094509
	0.15688	0.063075
	0.20298	0.024449
	0.19506	-0.02712
	0.12559	-0.035544
	0.027954	0.00226
	-0.078439	0.075402
	-0.13414	0.11526
	-0.12872	0.13683
	-0.083238	0.1543
	-0.019818	0.14279
	0.032753	0.17053
	0.07239	0.13786
	0.097841	0.080744
	0.11182	0.014587
	0.082194	-0.065951
	0.0062585	-0.04972
	-0.088662	-0.018902
	-0.14749	0.017053
	-0.1308	0.051158
	-0.071346	0.046844
	-0.0022948	0.059993
	0.059247	0.078484
	0.11432	0.061431
	0.13873	0.030202
	0.12809	-0.033078
	0.10118	-0.10047
	0.01961	-0.092455
	-0.078022	-0.065129
	-0.13331	-0.034105
	-0.14082	0.0055473
	-0.090956	0.01582
	-0.031084	0.031024
	0.024617	0.063691
	0.074476	0.087113
	0.11098	0.069649
	0.14999	0.019518
	0.15813	-0.055062
	0.10973	-0.10355
	0.022948	-0.096564
	-0.062793	-0.079511
	-0.11787	-0.017464
	-0.13894	0.019518
	-0.1187	0.039036
	-0.071555	0.092455
	-0.02566	0.12635
	0.021696	0.15183
	0.068426	0.13005
	0.10097	0.080127
	0.098049	0.037804
	0.048607	0.021778
	-0.029415	0.030818
	-0.095546	0.049309
	-0.12121	0.061225
	-0.11036	0.058144
	-0.066966	0.086496
	-0.016481	0.12964
	0.029206	0.1695
	0.082612	0.16971
	0.11703	0.12019
	0.13372	0.060815
	0.11432	0.019724
	0.052988	0.028353
	0.0031292	0.0565
	-0.015855	0.08136
	0.010848	0.10396
	0.045895	0.1317
	0.068426	0.1621
	0.079482	0.18101
	0.075936	0.16539
	0.10347	0.096358
	0.12496	0.021162
	0.1137	-0.030202
	0.068217	-0.037598
	0.0121	-0.027736
	-0.0047982	-0.021162
	-0.011891	-0.0034927
	0.0098049	0.021162
	0.029206	0.071704
	0.027329	0.12286
	0.042975	0.14813
	0.069052	0.11464
	0.12726	0.055267
	0.15959	0.015409
	0.13393	-0.016847
	0.081777	-0.02034
	0.028372	-0.0036982
	0.0091791	0.010478
	-0.0039637	0.022395
	-0.010014	0.044995
	0.008136	0.067389
	0.03171	0.078689
	0.060916	0.065745
	0.097423	0.023422
	0.13623	-0.016025
	0.14102	-0.025887
	0.092208	0.0012327
	0.040889	0.05198
	0.0121	0.10622
	0.0089705	0.12594
	0.033378	0.14485
	0.053197	0.16293
	0.050485	0.15738
	0.045061	0.15676
	0.040054	0.1169
	0.032335	0.069855
	0.034839	0.045816
	0.010639	0.042118
	-0.051319	0.072731
	-0.093042	0.095536
	-0.10139	0.09266
	-0.076979	0.079922
	-0.045061	0.073758
	-0.042766	0.072525
	-0.033587	0.075402
	-0.01815	0.050953
	0.017941	0.019929
	0.055492	0.010067
	0.024825	0.018902
	-0.040889	0.063485
	-0.099092	0.088756
	-0.11954	0.090605
	-0.1041	0.077045
	-0.080526	0.082593
	-0.048607	0.10643
	-0.023365	0.10827
	0.010431	0.10047
	0.06029	0.035749
	0.10639	-0.028764
	0.13059	-0.05424
	0.10243	-0.043762
	0.051111	-0.010889
	0.0058412	0.0080127
	-0.010848	0.016025
	0.015855	0.018285
	0.051319	0.033284
	0.090539	0.029585
	0.1187	0.0226
	0.15458	-0.010889
	0.19318	-0.055473
	0.18442	-0.064718
	0.13539	-0.055267
	0.04819	-0.012944
	-0.034004	0.0071909
	-0.073641	-0.0026709
	-0.086784	-0.018285
	-0.067174	-0.034722
	-0.03609	-0.039242
	-0.002712	-0.039036
	0.045895	-0.061636
	0.095963	-0.13108
	0.12767	-0.17299
	0.1137	-0.16765
	0.051945	-0.113
	-0.026911	-0.040269
	-0.077605	-0.02486
	-0.077396	-0.021573
	-0.065922	-0.030202
	-0.050485	-0.042118
	-0.041514	-0.049104
	-0.04068	-0.06554
	0.0062585	-0.11629
	0.069678	-0.15902
	0.10952	-0.1393
	0.099092	-0.097385
	0.03317	-0.013149
	-0.026703	0.037187
	-0.05424	0.046022
	-0.050068	0.040475
	-0.051945	0.036365
	-0.066131	0.064307
	-0.047356	0.059787
	-0.0039637	0.036982
	0.051111	-0.0073964
	0.086784	-0.034927
	0.074058	-0.0078073
	0.021487	0.064513
	-0.05278	0.13313
	-0.088453	0.15163
	-0.075727	0.15512
	-0.051945	0.13848
	-0.03609	0.14135
	-0.038594	0.12512
	-0.028163	0.073553
	0.011474	0.0080127
	0.040889	-0.059993
	0.042349	-0.075196
	0.018775	-0.043351
	-0.038802	0.025271
	-0.099092	0.060815
	-0.11641	0.083004
	-0.094711	0.072115
	-0.078439	0.065335
	-0.077814	0.079511
	-0.064879	0.045611
	-0.027537	0.01356
	0.026703	-0.06102
	0.065714	-0.081976
	0.06321	-0.039447
	0.027329	0.027736
	-0.033378	0.10088
	-0.074058	0.10314
	-0.077188	0.071909
	-0.06029	0.023422
	-0.038594	0.0065745
	-0.040889	-0.011916
	-0.03171	-0.035749
	0.013769	-0.078895
	0.065088	-0.11649
	0.074893	-0.085264
	0.036925	-0.011916
	-0.011682	0.080538
	-0.03609	0.12512
	-0.034839	0.1395
	-0.02858	0.12492
	-0.019818	0.12677
	-0.016272	0.12492
	-0.017315	0.096358
	-0.0068843	0.057733
	0.030666	-0.029585
	0.064254	-0.050542
	0.048607	-0.015409
	0.0056326	0.040269
	-0.030249	0.089989
	-0.045687	0.099235
	-0.035047	0.088962
	-0.016481	0.084031
	0.0077188	0.11423
	0.011474	0.11115
	0.0085532	0.091633
	0.053197	0.035749
	0.10076	-0.027325
	0.1235	-0.017053
	0.10222	0.01356
	0.048399	0.055062
	0.016689	0.076635
	-0.0022948	0.052596
	0.0089705	0.028558
	-0.0012517	0.035338
	-0.037134	0.02938
	-0.030249	0.018902
	-0.0060498	-0.028558
	0.034839	-0.11053
	0.056118	-0.11834
	0.046313	-0.10971
	0.014603	-0.061431
	-0.012934	-0.013355
	-0.018775	-0.040064
	-0.016689	-0.077251
	0.0068843	-0.08814
	0.0035465	-0.056089
	-0.0037551	-0.030202
	-0.0035465	-0.017053
	-0.00020862	-0.069649
	0.02858	-0.11382
	0.02712	-0.11259
	0.014186	-0.10478
	0.0010431	-0.058965
	-0.0089705	-0.063485
	0.013769	-0.072115
	0.028998	-0.060609
	0.030041	-0.032256
	0.01356	0.0113
	0.0093877	0.018902
	0.03463	-0.031024
	0.055492	-0.072115
	0.085532	-0.055062
	0.078648	-0.032051
	0.035256	0.047871
	0.014812	0.075402
	0.01961	0.053829
[truncated: 63,536 more rows]
