# Supplementary material for: Fault Characteristic Extraction by Fractional Lower-Order Bispectrum Methods
Source: Hindawi journal article supplement (doi:10.1155/2020/8823389), 2020-12-31
Supplement: f1 [file 8823389.f1.zip › 8823389.f1/our race fault signals.txt]

X234RPM	X234_BA_time	X234_DE_time	X234_FE_time
1796	0.035579	0.10436	0.1091
	-0.032278	0.017462	0.098002
	-0.034935	0.11655	0.037804
	0.028978	0.37116	0.00226
	0.021814	0.35695	0.072115
	0.01787	0.14782	-0.11547
	0.022297	0.23066	-0.1847
	0.030749	0.41665	-0.1582
	0.078724	0.22619	-0.20587
	0.067696	-0.034924	-0.17505
	0.041455	-0.00040609	0.011916
	0.074538	0.13929	-0.085058
	0.09933	0.094212	-0.065951
	0.099572	-0.1202	0.10827
	0.057312	-0.2002	0.00020545
	0.039523	-0.21685	0.22641
	0.056588	-0.22822	0.14916
	-0.018997	-0.071878	0.055884
	-0.063349	-0.042233	0.21511
	-0.049746	-0.17259	0.11875
	-0.071882	-0.055228	0.09266
	-0.026322	0.060507	0.19333
	-0.020043	-0.10721	0.24839
	-0.056427	-0.16893	0.11752
	0.020204	-0.0048731	0.11403
	0.031473	0.15025	-0.015409
	-0.023907	0.15391	-0.08136
	0.016904	0.035736	0.048282
	0.011108	0.073096	-0.070265
	-0.015455	0.25259	-0.14587
	-0.018514	0.21523	-0.032667
	-0.10505	0.068223	-0.11711
	-0.067213	0.0077157	-0.13724
	0.048619	-0.051573	0.12944
	0.0012879	0.015025	-0.076429
	-0.0058761	0.05604	-0.060198
	0.055058	-0.045076	0.16457
	0.023021	-0.00040609	0.0030818
	0.047492	0.049543	0.15142
	0.055461	-0.067411	0.19744
	-0.018594	-0.17665	0.029996
	0.033647	-0.19898	0.079716
	0.024712	-0.12508	0.13991
	-0.064557	-0.058477	-0.034722
	-0.031071	-0.060913	0.075402
	-0.055863	-0.062944	0.12553
	-0.10456	-0.068629	-0.085469
	-0.054253	-0.047512	0.15183
	-0.076792	-0.0036548	0.054856
	-0.073653	-0.036548	-0.11834
	0.041857	-0.078375	0.080949
	0.041857	0.021523	0.039653
	0.018433	0.10355	-0.040885
	0.051275	0.091776	0.055062
	-0.0080495	0.12183	-0.034722
	-0.0065201	0.14579	-0.059993
	0.0553	0.070659	0.084442
	-0.023585	0.036548	-0.014793
	-0.028978	0.017462	-0.045816
	0.027932	-0.080811	-0.024244
	-0.037591	-0.016244	-0.047665
	0.0091764	0.078781	-0.07684
	0.050631	0.004467	0.034927
	-0.029622	-0.062538	-0.021162
	0.037188	0.0060913	0.00226
	0.072687	0.0934	0.18614
	0.010464	0.026802	-0.079716
	0.06021	-0.061319	0.034516
	0.038154	0.02071	0.11773
	-0.0048297	0.12142	-0.018285
	0.047894	0.067411	0.1091
	-0.020526	0.017462	0.074785
	-0.0293	0.063756	0.066978
	0.062383	0.073502	0.12204
	0.0041857	0.0069035	0.04972
	0.023424	-0.057258	0.069238
	0.091925	-0.073096	0.16354
	0.0037027	-0.03005	0.011095
	0.0096593	0.0073096	0.052185
	0.014811	0.050761	0.020751
	-0.079207	0.14294	-0.065335
	0.010384	0.28223	0.12101
	0.058198	-0.25096	-0.01582
	0.011913	-0.81502	0.064102
	0.10271	0.2599	0.043967
	0.059003	0.74558	-0.20237
	-0.034371	-0.51208	-0.029175
	0.015616	-0.63918	-0.088551
	-0.041455	0.94578	0.024244
	-0.046123	0.62253	0.013355
	0.032439	-0.6201	-0.077251
	-0.041696	-0.29238	0.14731
	0.019238	-0.40771	0.04746
	0.10327	0.14132	0.18696
	-0.085968	0.68263	-0.12841
	-0.16703	-0.075126	0.17073
	-0.098284	-0.47634	0.38605
	-0.058359	0.45929	-0.067389
	0.058117	0.86537	0.3088
	0.098042	-0.25787	0.065335
	0.137	-0.61116	0.13067
	0.29276	0.02071	-0.038625
	0.24929	0.36792	0.06102
	0.066971	0.062944	0.038625
	0.0032198	-0.09137	-0.27202
	-0.054092	-0.096243	0.17792
	-0.044916	0.2266	-0.29709
	0.0053126	0.16771	-0.030613
	-0.088544	-0.35817	-0.0098618
	-0.053851	-0.42517	0.12738
	0.041616	-0.073908	0.23463
	-0.020526	-0.1535	-0.11505
	-0.10231	-0.46619	0.10273
	-0.1882	0.16203	-0.056089
	-0.19592	0.19452	0.10355
	-0.1209	-0.26599	-0.070265
	-0.064718	0.018274	0.23977
	-0.022297	0.2404	0.16683
	0.023504	-0.12304	-0.069855
	0.062061	-0.15919	0.019929
	0.025839	0.25868	-0.00678
	-0.018514	0.14172	-0.1317
	0.030266	-0.15594	-0.35235
	0.095306	0.34924	0.14649
	0.077033	0.53604	-0.26463
	0.033486	-0.14416	-0.054651
	0.043065	-0.071065	0.15327
	0.076953	0.35045	-0.086496
	0.076792	-0.021523	0.2184
	0.016823	-0.45401	0.10519
	-0.058922	-0.051979	0.0032873
	-0.025275	0.090558	0.27469
	0.053046	-0.28386	0.23031
	0.01457	-0.043857	0.032667
	-0.029944	0.11574	0.48241
	-0.057071	-0.16365	-0.020956
	-0.052482	-0.046294	-0.019929
	-0.0089349	0.19411	0.04746
	-0.029542	0.067411	-0.24223
	-0.019721	-0.18396	-0.040885
	0.046767	-0.070253	-0.14834
	0.032117	0.19005	0.10149
	-0.019238	0.030457	-0.128
	-0.007164	-0.038984	0.067595
	-0.015857	0.19046	0.14669
	-0.016179	0.086497	-0.11526
	0.018272	-0.098273	0.14957
	0.028898	0.14294	-0.080744
	0.059646	0.11939	-0.12964
	0.1007	-0.18436	0.25949
	0.071077	-0.17908	-0.062253
	0.025195	0.041827	-0.053418
	-0.0070835	0.068223	0.30531
	-0.06834	0.024365	-0.15224
	-0.053931	0.090151	0.24161
	-0.03751	0.0040609	0.22415
	-0.053609	0.07472	-0.11505
	0.018272	0.16122	0.27819
	0.069708	0.0012183	0.052802
	0.0879	-0.2132	-0.030407
	0.14143	-0.096243	0.11957
	0.067937	0.23188	-0.054856
	-0.024229	0.092588	-0.16703
	0.013282	-0.20304	0.14526
	-0.025436	0.033299	0.019929
	-0.059727	0.16771	-0.047049
	-0.034291	-0.14619	0.14094
	-0.06021	-0.078781	-0.021162
	-0.0014489	0.11736	0.13293
	0.083151	-0.099492	0.1506
	0.032842	-0.1336	0.024449
	0.011833	0.15513	-0.031024
	0.025597	0.08203	0.091016
	-0.0080495	-0.11939	0.026298
	0.034774	-0.0032487	-0.046022
	0.024148	0.17462	0.11834
	-0.019238	0.11898	-0.065745
	0.031876	0.0081218	-0.024244
	-0.0044272	0.060507	-0.020135
	-0.035337	0.041827	-0.14895
	0.00064396	-0.067004	-0.15245
	-0.064396	-0.054822	-0.032667
	-0.055783	-0.060507	0.00452
	0.0326	-0.19939	0.062869
	0.015374	-0.077157	0.19703
	0.051436	0.1803	0.10375
	0.082507	0.081624	0.26401
	0.024873	-0.11736	0.10992
	0.049021	-0.0032487	-0.0043145
	0.05208	0.20101	0.18203
	-0.0027368	0.047918	-0.0061636
	0.018514	0.026396	0.027531
	0.0012074	0.52994	0.025271
	-0.025678	0.8471	-0.028147
	0.063671	-0.7001	0.069855
	0.11664	-2.0081	0.090811
	0.12219	0.81055	-0.13539
	0.066408	2.0792	-0.28558
	-0.14014	-2.0853	-0.30181
	-0.26917	-2.1766	-0.054856
	-0.21629	2.3671	0.33921
	-0.19085	1.2723	-0.2412
	-0.23794	-2.3683	-0.041913
	-0.22965	-2.0252	0.25374
	-0.046767	0.69197	0.20792
	0.11527	1.3429	0.082798
	-0.072848	0.6538	-0.28188
	-0.28898	0.59857	0.72772
	-0.054656	-0.77157	0.37352
	0.33349	0.56568	-0.14752
	0.41632	3.2243	0.11321
	0.36907	0.46578	-0.088962
	0.46614	-3.0107	-0.0094509
	0.64009	0.1133	-0.20648
	0.49866	3.3287	-0.081771
	0.0082104	-0.45076	-0.042324
	-0.35828	-3.3299	-0.10232
	-0.37036	0.17137	-0.85777
	-0.21098	1.6711	0.19313
	-0.24012	-1.3779	0.0063691
	-0.35997	-1.7283	-0.069855
	-0.25678	0.16812	1.7601
	-0.024631	0.047106	-0.0065745
	0.0055541	-0.75695	0.53377
	-0.18634	-0.075938	0.2186
	-0.23464	-0.10518	-0.21881
	0.019882	-0.35898	0.24059
	0.20719	1.0124	-0.36057
	0.074135	1.1196	0.37002
	-0.0086129	-0.27492	-0.20381
	0.13257	0.080405	-0.2449
	0.15817	1.736	-0.79614
	0.06995	1.0197	-0.2749
	-0.034532	-1.161	-0.5802
	-0.035176	-0.38294	-0.82778
	0.19955	1.3876	-0.060198
	0.23351	0.46132	-0.256
	-0.0099008	-0.98639	0.46022
	-0.051436	-0.59126	0.077867
	0.082829	0.43208	0.98639
	0.08959	0.038984	0.63773
	0.015857	-0.80487	-0.011916
	-0.050229	-0.64284	0.74806
	0.076631	-0.23797	0.11916
	0.24197	-0.091776	0.32421
	0.046204	0.10152	0.35729
	-0.20599	-0.22903	0.21717
	-0.18313	-0.51086	0.35277
	-0.1308	0.25705	0.0030818
	-0.13861	0.6802	-0.37598
	-0.10988	-0.024771	0.17669
	-0.071721	-0.50639	-0.44604
	0.10166	0.23512	-0.46125
	0.14674	0.86497	0.18224
	-0.049746	0.43654	-0.77066
	-0.048699	-0.13848	-0.1545
	0.089993	0.025584	-0.22888
	0.11028	0.41421	-0.17464
	0.080334	0.2335	0.24408
	0.018836	-0.12751	-0.2862
	-0.0046687	-0.1133	0.20299
	0.10738	-0.041015	0.42385
	0.060451	-0.2201	0.10437
	-0.078965	-0.11005	0.17505
	-0.045801	-0.00040609	0.21121
	-0.070916	-0.33015	0.22949
	-0.06834	-0.55269	0.47645
	0.016582	-0.2201	0.0226
	-0.082668	0.0934	0.15799
	-0.094903	-0.13848	0.13478
	0.060129	-0.37888	0.089784
	0.059083	-0.026396	0.27408
	0.075745	0.52913	-0.13396
	0.08621	0.60913	-0.033284
	0.00088544	0.31269	-0.12533
	0.088303	0.0028426	0.054035
	0.1135	0.067411	-0.20648
	-0.035659	0.27411	-0.43865
	-0.037993	0.21766	-0.26401
	0.01143	-0.17178	0.059171
	-0.0085324	-0.40406	0.052596
	-0.0053126	-0.067004	0.00020545
	-0.099089	0.1669	0.2938
	-0.15093	-0.14335	-0.077045
	-0.051114	-0.54538	0.28743
	-0.082507	-0.47472	-0.033078
	-0.077919	-0.1535	-0.04068
	0.025517	0.012995	0.19251
	-0.012396	0.097867	-0.18285
	0.010867	0.086903	0.15799
	0.07325	-0.0064974	-0.079922
	-0.0036223	0.29157	-0.1656
	0.048377	0.57015	-0.05198
	0.10859	0.19005	0.13704
	0.038879	-0.25096	0.045816
	0.090637	-0.07472	0.12677
	0.071962	0.75411	0.068211
	0.0035418	0.73015	-0.12533
	0.057715	-0.44467	0.15717
	0.0024148	-0.7139	-0.14711
	-0.030024	0.21969	0.18676
	0.039201	0.38781	-0.0043145
	-0.046526	-0.80608	0.036571
	-0.091281	-0.96974	0.31373
	-0.018916	0.21238	-0.034927
	-0.043467	0.27939	0.27551
	-0.042662	-0.46822	-0.14669
	0.0020124	-0.14335	-0.0053418
	0.04226	0.18112	0.071704
	0.1308	0.023553	-0.21922
	0.10609	0.36589	0.088756
	0.022056	0.21807	0.00082182
	0.035579	-0.20792	-0.012327
	0.02117	0.29076	-0.050953
	-0.035337	0.84344	0.056089
	-0.061981	-0.22091	-0.075196
	-0.046365	-0.64162	0.079922
	-0.011913	0.89014	-0.013149
	-0.03413	0.60223	-0.24079
	-0.072123	-1.0972	0.16149
	-0.065281	-0.24	0.085058
	-0.031473	1.0575	0.093687
	0.022458	-0.42071	-0.021573
	0.045962	-0.91329	0.29524
	0.068259	0.48568	0.17628
	0.15222	0.17218	0.16313
	0.14046	-0.68872	0.45816
	0.01956	0.033299	-0.26298
	0.0089349	0.23269	0.35133
	0.054656	-0.53807	0.10519
	0.043467	0.076751	-0.37126
	0.0063591	0.72202	0.29359
	-0.01626	-0.24081	-0.2223
	0.053851	-0.48974	-0.053213
	0.092569	0.64243	0.25127
	-0.0086129	0.36142	-0.1658
	-0.061095	-0.63715	-0.1845
	-0.054414	-0.010152	0.15163
	-0.10617	0.66517	-0.024038
	-0.087981	0.013807	0.12738
	-0.028334	-0.35614	0.24552
	-0.057071	0.30619	-0.0073964
	0.024873	0.25705	0.24079
	0.15254	-0.25462	-0.018491
	0.10674	0.1137	0.026504
	0.061337	0.17584	-0.24408
	0.057232	-0.2603	0.085058
	0.027288	-0.033299	0.011095
	0.0046687	0.1933	-0.41009
	-0.087981	-0.032081	0.34003
	-0.16196	-0.12304	-0.2862
	-0.087176	-0.036142	-0.15183
	-0.082426	-0.08406	0.37516
	-0.13354	-0.34761	-0.047255
	-0.071077	-0.34639	0.2223
	-0.0083714	-0.092588	0.34434
	0.032439	-0.081218	-0.019929
	0.070594	-0.19939	0.43002
	0.025919	-0.16731	0.26956
	0.0020124	0.083248	-0.20402
	0.051436	0.2737	0.36304
	-0.011672	0.1604	-0.22127
	-0.035498	-0.030863	-0.21552
	-0.0080495	0.14822	0.013149
	-0.063913	0.4268	-0.35133
	-0.014731	0.16203	-0.053624
	0.03421	-0.1604	-0.069855
	0.013684	0.079999	0.03842
	0.089993	0.28467	0.062047
	0.12227	0.021929	0.030407
	0.077194	-0.026802	0.068622
	0.13314	0.064162	0.06102
	0.11221	-0.021523	-0.049309
	0.038074	-0.052791	-0.075813
	0.045721	-0.054416	-0.087935
	-0.007808	-0.1133	-0.0047255
	-0.046043	-0.15391	0.016436
	-0.067776	-0.05604	-0.18244
	-0.16445	-0.028426	0.18799
	-0.14682	-0.080405	0.043762
	-0.039362	-0.00081218	0.036776
	-0.064798	0.11492	0.39262
	-0.015455	-0.028832	0.17977
	0.10142	-0.16731	0.16888
	0.10577	0.064974	0.27551
	0.15044	0.22375	0.051158
	0.13161	0.034517	-0.057527
	0.048377	-0.064568	0.023216
	0.063671	0.15919	-0.20278
	0.0027368	0.25584	0.0088345
	-0.066971	0.040203	-0.09266
	-0.038557	-0.088121	-0.22949
	-0.095708	0.08406	0.064307
	-0.066971	0.11086	-0.062869
	0.032922	-0.12629	-0.00020545
	-0.018353	-0.086903	0.0082182
	-0.014167	0.077157	0.062253
	0.028415	0.0077157	0.093893
	-0.0099813	-0.18112	0.16786
	0.032359	-0.16162	0.17217
	0.049343	-0.012589	0.20032
	-0.0085324	-0.051573	0.18737
	0.015294	-0.10112	0.070882
	-0.00048297	-0.053604	0.16313
	-0.041938	0.0064974	-0.049104
	-0.039603	0.028426	0.0061636
	-0.077516	0.044264	-0.016025
	-0.036947	0.025177	0.057938
	0.077677	0.041421	0.046227
	0.086129	0.038172	-0.0020545
	0.067937	0.022741	0.18779
	0.083473	0.12792	-0.073347
	0.081621	0.080405	0.064102
	0.05699	-0.018274	0.080949
	-0.0066006	0.051167	-0.082387
	-0.026402	0.087309	-0.016847
	-0.034532	0.00040609	-0.080949
	-0.069145	0.034111	-0.16847
	-0.053368	-0.28304	-0.0092455
	-0.062303	-0.43614	-0.039036
	-0.086693	0.13685	-0.19415
	-0.066891	0.10071	0.17238
	-0.073331	-0.3204	0.018285
	-0.052482	-0.21279	0.098824
	0.0049102	0.10071	0.31455
	0.0042662	0.064568	-0.042118
	0.023826	-0.18558	0.16087
	0.03099	-0.32406	0.22292
	-0.0052321	-0.042639	-0.050953
	0.0022538	0.53563	0.023833
	-0.059485	0.50517	0.00452
	-0.12493	-0.13238	-0.032462
	-0.0057151	-0.097055	0.12019
	0.10633	0.74233	-0.018696
	0.10416	0.52548	-0.094304
	0.12412	-0.37726	0.0061636
	0.1296	-0.08203	0.079511
	0.16493	0.47472	-0.091633
	0.17773	0.01665	-0.095125
	0.030749	-0.27086	0.048076
	-0.032359	-0.00040609	-0.10396
	0.030266	-0.18518	0.14834
	-0.018111	-0.30781	0.090195
	-0.077597	0.00934	0.0055473
	-0.07317	-0.11005	0.40762
	-0.078643	-0.42842	0.24305
	-0.021653	-0.1003	-0.032667
	-0.024953	0.25015	0.23031
	-0.10738	-0.053604	0.07006
	-0.059244	-0.24243	-0.079511
	0.018916	0.092182	0.17094
	0.017065	0.2538	-0.12019
	0.029059	-0.010964	-0.058349
	0.00040247	-0.0048731	-0.025682
	-0.013845	0.37563	-0.21491
	0.074699	0.30822	-0.061225
	0.046445	-0.0089339	-0.083209
	-0.013845	0.11898	-0.13581
	0.062383	0.25665	-0.054035
	0.074296	0.10436	0.048282
	0.038476	-0.017056	-0.096769
	0.060854	-0.077969	0.076018
	0.024068	-0.10193	0.23483
	0.017467	-0.068629	0.049309
	0.052804	-0.062538	0.18758
	-0.026483	-0.15066	0.27038
	-0.022699	-0.23797	0.15039
	0.051275	-0.17827	0.2223
	0.014328	0.0073096	0.22066
	0.020204	0.021929	0.09944
	-0.0061981	-0.14416	0.13539
	-0.098686	-0.063756	-0.098618
	-0.033566	0.19452	-0.047665
	-0.011752	0.11533	0.066773
	-0.073653	-0.13279	-0.15841
	0.014972	-0.029238	-0.026504
	0.030829	0.20223	0.01356
	-0.035418	0.15878	-0.042118
	0.01143	-0.036954	-0.081155
	-0.011269	0.0467	-0.10026
	-0.037188	0.1937	-0.056705
	0.030507	0.021117	-0.052596
	-0.01143	-0.099492	-0.074785
	0.0084519	0.029644	-0.061431
	0.082748	0.0467	0.080744
	-0.0054736	-0.095431	0.058144
	0.0034613	-0.095837	0.044173
	0.040811	-0.05604	0.11567
	-0.049826	-0.0024365	0.085264
	-0.020687	0.010558	0.051775
	0.0024953	-0.10355	0.17155
	-0.047492	-0.12711	0.14053
	0.026966	-0.022741	0.0028764
	0.021331	-0.021523	0.10889
	-0.039362	-0.1267	0.04746
	0.024068	-0.013401	-0.0014382
	-0.021895	0.092994	0.0053418
	-0.051999	0.076345	-0.024449
	0.033486	0.098679	0.041913
	-0.0094179	0.038984	0.060815
	0.0023343	-0.017056	-0.022395
	0.069547	0.084872	-0.015409
	0.011108	0.14132	0.089373
	0.036384	-0.05401	-0.084442
	0.075665	-0.13117	-0.023011
	0.011028	0.078781	0.097385
	0.023424	0.16974	-0.053213
	0.010786	-0.078781	0.010067
	-0.038154	-0.20873	0.083209
	-0.00064396	0.040203	0.063075
	-0.025517	0.07472	0.067389
	-0.035981	-0.13198	0.047665
	0.0047492	0.01665	-0.026709
	-0.022699	0.16122	-0.0059582
	-0.023263	-0.067004	0.00904
	-0.007164	-0.062944	-0.017258
	-0.018916	0.089745	0.11033
	0	-0.03533	0.074375
	0.040972	-0.082842	0.0339
	0.088705	0.070253	0.11362
	0.080012	0.15797	0.061842
	0.020848	0.061725	0.00041091
	0.035498	-0.026396	0.092455
	0.046606	0.074314	0.087318
	0.028415	0.1133	-0.05876
	0.040569	0.11858	0.11423
	0.016823	0.25624	0.023627
	0.020043	0.33137	-0.046638
	0.082748	-0.52629	0.25785
	0.092971	-1.0408	0.10519
	0.072284	0.56162	-0.024449
	0.0069225	0.91979	-0.0092455
	-0.13233	-1.0774	-0.17854
	-0.1688	-0.9539	0.048282
	-0.11334	1.5285	0.31003
	-0.093293	0.72649	-0.17073
	-0.07325	-1.6406	-0.029585
	-0.035498	-0.55959	0.21203
	0.02439	0.11736	-0.18285
	0.032198	-0.19614	0.16827
	-0.1168	1.4465	-0.17484
	-0.25283	1.1403	-0.11115
	-0.13523	-1.7283	0.48426
	0.060532	0.18233	0.025271
	0.15302	3.2877	0.18655
	0.30314	-0.69116	0.13108
	0.42509	-3.4928	-0.077867
	0.41736	1.2248	0.023627
	0.32343	2.9466	0.039036
	0.0012879	-1.5261	0.05424
	-0.27175	-2.0377	-0.23997
	-0.18441	1.2731	-0.20792
	-0.057715	0.92588	-0.043145
	-0.094742	-1.2625	-0.31989
	-0.15801	-0.65421	0.03616
	-0.069467	-0.12792	0.78073
	0.11768	-0.72202	0.16909
	0.019238	0.38213	0.27243
	-0.32608	0.69806	0.24716
	-0.33671	-0.81664	-0.42098
	-0.053368	-0.17543	0.056911
	0.028978	1.758	-0.088345
	0.033727	0.63634	0.48405
	0.10641	-1.2398	0.22785
	0.15664	-0.11005	-0.61595
	0.2311	1.1768	0.16087
	0.11607	-0.10964	-0.066773
	-0.14119	-0.92182	-0.49289
	-0.10899	0.14497	-0.33469
	0.046767	0.64324	-0.20258
	0.079529	0.038984	0.027325
	0.045077	-0.25259	0.011916
	-0.037993	0.014619	0.080949
	0.081219	-0.058883	0.58616
	0.20977	-0.35451	0.12656
	0.0016904	-0.47431	0.048693
	-0.11012	-0.29685	0.59643
	0.0037027	0.15756	-0.051775
	0.042743	0.36304	-0.12738
	0.0087739	0.15634	0.060198
	-0.12396	0.12061	0.33304
	-0.19222	0.32487	0.12759
	0.0034613	0.23066	-0.34311
	0.07325	-0.0097461	0.11957
	-0.011591	-0.086091	-0.092044
	0.094662	-0.18518	-0.30695
	0.1919	-0.12142	0.013765
	0.1469	0.22822	0.093276
	0.021895	0.27655	-0.073553
	-0.15109	-0.025177	-0.0113
	-0.12203	0.048324	0.23401
	0.044755	0.1665	0.23566
	0.033405	-0.26964	-0.045405
	0.019963	-0.46781	-0.077662
	0.078241	-0.024365	0.24387
	0.063108	0.026396	0.049104
	0.065925	-0.42477	-0.14443
	-0.028978	-0.071065	0.073142
	-0.17677	0.51005	0.14834
	-0.12412	0.1998	-0.023422
	-0.073653	-0.24325	0.17936
	-0.082024	-0.051573	0.11238
	0.0078885	0.19533	-0.13046
	0.054978	-0.075532	0.0043145
	0.096835	-0.21238	-0.063485
	0.14561	0.0060913	0.0012327
	0.076792	0.16122	-0.08588
	0.028978	0.23472	-0.086496
	-0.0016099	0.26721	0.07006
	-0.034613	0.10477	0.22127
	0.024068	-0.083654	0.14546
	0.025597	-0.012995	-0.01356
	-0.023907	-0.01137	0.13807
	0.013684	-0.14132	0.026093
	0.035901	-0.075126	0.077867
	0.011913	-0.047918	0.14464
	-0.070433	-0.15716	-0.014382
	-0.15358	-0.13238	-0.14608
	-0.1366	-0.1064	0.12081
	-0.11905	-0.16528	-0.0041091
	-0.080897	-0.15066	-0.18327
	-0.038557	-0.1133	0.23114
	-0.018272	0.038172	-0.0088345
	0.090476	0.18842	0.094715
	0.13338	0.1064	0.082798
	0.050068	0.072284	-0.21984
	0.062625	0.12223	-0.0086291
	0.063591	0.11492	0.075402
	0.0097398	0.087715	-0.023216
	0.04564	0.039797	0.10252
	0.045318	0.19573	0.13683
	0.063752	0.42233	-0.085058
	0.13418	0.12183	0.28887
	0.07486	-0.22294	-0.026504
	0.038959	-0.080405	-0.22004
	0.084197	0.064568	0.21634
	-0.0083714	-0.06538	0.038215
	-0.086371	-0.29116	-0.053213
	-0.082426	-0.20954	-0.00082182
	-0.14272	0.1466	0.099851
	-0.11342	0.082436	-0.056911
	-0.041294	-0.23025	0.011711
	-0.059164	-0.11411	0.025682
	-0.010303	-0.06538	-0.070882
	0.027529	-0.014213	0.11053
	-0.015213	0.16731	0.026504
	0.026161	-0.0020304	0.077456
	0.020365	-0.12751	0.14875
	-0.027771	0.3135	-0.022189
	0.060854	0.51126	-0.0086291
	0.092971	-0.19411	0.2523
	0.079448	-0.24487	-0.035338
	0.1432	0.31715	0.012533
	0.084922	0.049949	0.27777
	-0.0042662	-0.24812	-0.050131
	0.020124	0.10233	0.14156
	-0.035901	0.10761	0.033489
	-0.072204	-0.05604	-0.0904
	-0.017145	0.1868	0.039242
	-0.04556	0.054822	-0.10375
	0.00048297	-0.38497	-0.019313
	0.045399	-0.15594	0.0061636
	-0.0619	0.30132	0.0053418
	-0.035015	-0.13848	-0.0012327
	0.021653	-0.47756	0.30079
	-0.057554	0.14294	0.14813
	-0.0055541	0.42761	-0.089578
	0.062947	-0.11005	0.27634
	0.033486	-0.17665	0.017053
	0.1147	0.057664	0.01582
	0.11277	-0.022335	0.08362
	0.019319	-0.01665	-0.1356
	0.034291	0.00081218	-0.01582
	-0.012074	-0.057258	-0.0082182
	-0.037591	-0.11167	-0.019313
	0.0037027	0.15878	-0.02486
	-0.10287	0.19492	0.038625
	-0.11519	-0.11777	-0.014587
	-0.00056346	-0.11086	0.020956
	-0.04226	0.13969	-0.018696
	-0.013684	0.22254	-0.18224
	0.043467	-0.0016244	0.031024
	-0.027207	0.017462	0.016847
	0.056749	0.18558	-0.045816
	0.10601	0.056446	0.0098618
	-0.0026563	0.0012183	0.024244
	0.038074	0.088527	0.15286
	0.061015	-0.024365	0.14608
	0.019641	-0.028426	0.10951
	0.099652	0.015025	0.11053
	0.053368	-0.069035	0.062458
	-0.00040247	-0.074314	0.084442
	0.10472	-0.071471	0.073964
	0.023585	-0.12183	0.035338
	-0.048619	-0.18152	0.0078073
	0.019882	-0.017056	0.059376
	-0.057554	0.076345	0.17176
	-0.062544	-0.049949	-0.032873
	-0.033083	-0.028426	-0.037804
	-0.12316	0.077563	0.098413
	-0.053448	0.069035	-0.086702
	0.0077275	-0.064568	-0.018696
	-0.050551	-0.032487	0.0051364
	-0.0075665	0.067817	-0.06328
	0.0038637	0.047918	0.038831
	-0.017467	0.028832	0.0071909
	0.0326	0.0016244	-0.0061636
	-0.0020124	-0.026396	0.089167
	-0.011591	-0.021117	0.014793
	0.070835	0.0052791	0.0226
	0.056266	-0.085278	0.16108
	0.030749	-0.064974	0.019518
	0.030346	0.093806	-0.018902
	-0.026644	0.032893	0.025065
	-0.051758	-0.036142	0.0051364
	-0.04065	0.038578	-0.030818
	-0.045077	-0.033705	0.034927
	0.013845	-0.13888	0.048076
	0.049665	-0.058883	-0.0073964
	0.0095789	-0.025584	0.12204
	-0.013523	0.016244	0.02486
	-0.047331	0.092182	0.032667
	-0.049263	0.01868	0.020956
	-0.0293	0.062131	-0.0096564
	-0.020526	0.19452	0.0565
	0.0027368	-0.011777	0.096564
	0.020929	-0.20873	0.0043145
	0.052885	-0.075938	-0.0016436
	0.067857	0.02071	0.2638
	0.00096593	-0.046294	-0.028969
	-0.033727	-0.13117	0.038009
	-0.0029783	0.061725	0.16477
	0.0049102	0.1933	-0.08588
	0.043548	-0.050355	0.064513
	0.060451	-0.077969	0.029585
	0.051195	0.045888	-0.068416
	0.076711	-0.066192	0.025271
	0.063671	-0.052791	0.048487
	0.014811	0.12832	-0.096153
	-0.020526	0.088933	0.084442
	-0.067776	0.0097461	0.075813
	-0.08621	0.05604	-0.036982
	-0.0099008	0.02802	0.25969
	0.029944	-0.0032487	0.05424
	0.04065	0.070659	-0.050131
	0.10762	0.097055	0.12368
	0.089188	0.15066	-0.08588
	0.02278	0.17584	-0.16251
	0.026241	0.14335	0.00082182
	0.00813	0.21969	-0.12019
	0.0094179	0.10477	-0.051158
	0.049263	-0.19005	0.069855
	0.025919	-0.27289	-0.027942
	0.026483	-0.087309	0.15471
	0.0072445	-0.051979	0.11526
	-0.098847	-0.32446	0.062869
	-0.12557	-0.33624	0.196
	-0.095708	0.027208	0.2825
	-0.085324	-0.069035	0.087524
	0.00080495	-0.50761	0.128
	0.02608	-0.33299	0.29462
	-0.03252	0.067004	-0.10869
	0.01135	0.24446	0.073964
	-0.013362	0.39187	0.058349
	-0.082426	0.32162	-0.12985
	-0.0053126	0.1531	0.20093
	0.041052	0.47269	-0.040064
	0.079368	0.57543	-0.1506
	0.20405	-0.052791	0.046844
	0.22563	-0.10964	-0.10622
	0.23778	0.36467	-0.044584
	0.21017	0.22619	0.084442
	-0.0013684	-0.18518	-0.093071
	-0.070835	-0.15188	0.023216
	-0.014167	-0.057258	-0.016025
	-0.036384	-0.21766	-0.092455
	-0.029139	-0.32568	0.043967
	-0.060693	-0.37482	0.042324
	-0.13185	-0.45116	0.15286
	-0.10448	-0.22944	0.083209
	-0.15205	0.063756	0.015615
	-0.21363	-0.1202	0.0032873
	-0.10617	-0.18924	0.18491
	-0.05047	0.25421	0.3429
	0.00064396	0.32406	0.23422
	0.111	-0.059289	0.24161
	0.10263	0.16	0.096564
	0.11615	0.48446	-0.13478
	0.12839	0.22497	-0.28907
	0.006842	0.12995	-0.25312
	-0.036223	0.17868	-0.35256
	-0.046526	-0.0097461	-0.34249
	-0.086773	-0.062131	-0.24942
	-0.040006	0.045888	-0.22723
	-0.051838	-0.15513	0.056911
	-0.079046	-0.35939	0.10848
	-0.00080495	-0.14538	0.17423
	0.0041857	-0.0077157	0.33427
	0.0032198	-0.15959	0.38872
	0.089751	-0.20751	0.25271
	0.087417	-0.079999	0.30222
	0.079851	-0.069035	0.25641
	0.09273	-0.10761	0.063075
	0.013845	-0.013401	0.14217
	-0.028817	0.1068	-0.10314
	-0.057715	0.16365	-0.18347
	-0.12436	0.14254	-0.14793
	-0.11221	0.13726	-0.073964
	-0.059324	0.13969	0.0030818
	-0.0059566	0.10355	0.038009
	0.051517	0.083248	0.042118
	0.063188	0.10599	-0.078278
	0.09925	0.034111	0.12163
	0.13435	-0.02071	-0.065745
	0.09933	0.032487	-0.10643
	0.042984	-0.047512	0.021984
	-0.021895	-0.093806	-0.11547
	-0.024953	-0.064568	0.058555
	-0.016582	-0.13645	0.095742
	-0.080092	-0.12954	0.0061636
	-0.092005	-0.070253	0.050542
	-0.062303	-0.094212	0.1206
	-0.056266	-0.034924	0.042324
	0.012477	-0.0073096	0.13355
	0.055944	-0.077969	0.15121
	0.059727	-0.059695	0.065951
	0.13861	0.011777	0.21285
	0.12734	0.064974	0.12903
	0.074296	0.069035	0.028764
	0.080656	0.097055	0.062869
	-0.011189	0.25868	0.0096564
	-0.06995	0.24893	-0.033489
	-0.035981	0.038984	0.086085
	-0.070594	0.077563	0.00678
	-0.039201	0.19736	-0.060609
	0.031071	0.11249	0.12368
	0.014328	0.021523	-0.0012327
	0.062866	0.025177	0.090195
	0.081863	-0.017462	0.20278
	0.028978	-0.041421	-0.050542
	0.059646	-0.036954	0.03842
	0.057312	-0.094618	0.1054
	-0.021814	-0.15513	-0.029585
	0.0031393	-0.18558	0.039447
	0.00016099	-0.065786	0.061225
	-0.082829	0.083654	-0.057938
	-0.040811	0.023959	0.023011
	-0.046606	-0.069847	-0.030407
	-0.082104	0.032487	-0.13129
	-0.01626	0.078781	0.090195
	-0.036625	-0.063756	0.078073
	-0.03421	-0.097867	0.064718
	0.053448	-0.023147	0.17053
	0.018916	0.084466	0.050542
	0.0062786	0.11655	0.0012327
	0.041616	0.021117	0.091838
	-0.032359	0.0081218	0.025476
	-0.013684	-0.0077157	-0.055062
	0.039764	-0.038984	0.077867
	-0.032037	-0.039391	0.0014382
	-0.024309	-0.024365	-0.044995
	0.017628	-0.0097461	0.056295
	-0.027771	0.038172	-0.087524
	0.022377	-0.021929	-0.045816
	0.043065	-0.058477	0.029791
	-0.041052	0.1669	-0.07684
	0.01465	-0.018274	0.012533
	0.0070835	-0.20914	0.039447
	-0.04395	0.00934	-0.02486
	0.036142	0.15756	0.027942
	-0.033566	0.098679	-0.0034927
	-0.082909	-0.051979	-0.049515
	0.0098203	-0.085685	0.065335
	-0.039281	0.18599	0.032462
	-0.027288	-0.080405	-0.075196
	0.046526	-0.54456	0.15635
	-0.032037	0.28386	0.074785
	0.011672	0.54213	-0.017464
	0.084519	-0.53928	0.20463
	-0.0012879	-0.39187	-0.0053418
	0.047009	0.8873	0.17792
	0.095386	0.23269	0.085058
	0.0020124	-0.81786	-0.19066
	0.041213	0.15431	0.23668
	0.058761	0.6205	-0.04972
	-0.0028173	-0.24406	-0.039036
	0.030185	-0.25218	0.046227
	-0.026402	0.41137	-0.12245
	-0.031151	0.071471	0.060404
	0.104	-0.2002	-0.2186
	0.028012	0.33868	0.023216
	-0.0061981	0.18274	0.23771
	0.11559	-0.56365	0.046433
	0.034371	-0.14172	0.11649
	0.0023343	0.43614	0.13211
	0.046526	-0.1803	0.057938
	-0.041857	-0.39309	0.039858
	-0.01465	0.16081	0.047255
	-0.0059566	0.20832	0.18737
	-0.07494	-0.22578	0.14423
	0.0028978	-0.17827	-0.085264
	-0.0029783	0.21523	0.21922
	-0.037591	0.064568	-0.0082182
	0.056668	-0.13888	-0.11773
	0.011028	0.12589	0.068827
	-0.030185	0.20751	-0.026298
	0.063913	0.10599	0.10622
	0.038396	0.070253	-0.13765
	0.0015294	0.05401	-0.027531
	0.026724	0.081218	0.15327
	-0.0023343	-0.064568	0.019929
	0.02439	-0.17908	-0.061636
	0.045962	-0.017462	0.07458
	-0.011672	0.069035	0.072936
	0.020687	-0.054822	-0.082182
	0.031232	-0.15147	0.17423
	-0.046445	-0.079593	0.20771
	-0.061659	-0.042233	0.12677
	-0.043628	-0.17259	0.041913
	0.0052321	-0.17624	0.1734
	0.039281	0.066598	0.031229
	0.0055541	0.045482	-0.10314
	-0.0099008	-0.1133	0.076224
	-0.010867	0.17787	-0.096564
	-0.013362	0.25787	0.027531
	0.0016099	-0.047918	-0.057938
	-0.0058761	0.067411	-0.16087
	-0.020285	0.24406	0.075196
	-0.011672	0.017868	-0.039447
	0.0058761	-0.025584	-0.17012
	0.024873	0.11939	0.10971
	-0.0027368	0.06335	0.068005
	-0.035015	-0.05604	-0.033078
	-0.012316	-0.090151	0.22025
	-0.0063591	-0.030863	0.058144
	-0.0020929	-0.053198	0.051364
	0.038959	-0.095431	0.13272
	0.036223	-0.034924	-0.047665
	0.010545	0.011777	-0.050131
	0.02278	-0.0036548	0.052596
	0.0082909	0.0020304	-0.087318
	-0.011833	-0.03005	-0.058555
	-0.012316	-0.069847	0.11957
	-0.040167	0.038984	-0.043351
	-0.036706	0.040609	0.079305
	0.0019319	-0.012589	0.15799
	0.00016099	0.02802	0.028353
	0.0091764	0.051979	0.074169
	0.010786	0.071471	0.078073
	-0.039845	0.0934	-0.0020545
	-0.023907	0.0097461	0.012738
	0.015133	-0.043045	0.11464
	0.0020124	-0.0016244	-0.095125
	0.01135	-0.036142	-0.037804
	0.00080495	0.026802	0.1091
	-0.027207	-0.015837	-0.11362
	0.018836	-0.077157	0.098413
	0.041213	0.077157	0.21203
	0.022538	0.044264	-0.050336
	0.070835	-0.18721	0.19744
	0.070594	-0.010152	0.16971
	0.025195	0.18721	-0.13067
	0.04725	-0.18924	0.14587
	0.014731	-0.15634	-0.083004
	-0.021331	0.23837	-0.10807
	-0.016421	0.077563	0.17176
	-0.082426	-0.23431	-0.13129
	-0.080253	0.095431	0.020545
	-0.037993	0.24731	0.13601
	-0.059083	-0.066598	-0.0084236
	0.00064396	-0.0934	0.046433
	0.07164	0.20507	0.15245
	0.068179	0.3005	0.075813
	0.12171	0.18761	0.049104
	0.1556	0.85278	0.12225
	0.1535	0.61685	0.0113
	0.24438	-1.2114	0.25764
	0.26539	-1.8047	0.066567
	0.18023	1.0709	-0.14464
	0.044353	1.4753	-0.3503
	-0.23102	-2.3017	-0.40043
	-0.43491	-1.4315	0.053624
	-0.39281	2.3167	0.11053
	-0.35273	1.092	0.095742
	-0.34605	-3.63	-0.18018
	-0.1993	-1.9728	0.6591
	0.007325	2.5917	0.088962
	0.11817	1.3433	-0.35482
	-0.11889	0.11817	0.67307
	-0.26869	0.6002	0.27634
	0.15262	-0.027208	0.64492
	0.49625	1.4258	-0.16087
	0.51847	2.5092	-0.25209
	0.51605	-1.2036	-0.054856
	0.66529	-2.6136	-0.26853
	0.72864	1.7011	-0.1543
	0.33075	2.5847	-0.36797
	-0.28141	-2.3797	0.72299
	-0.51782	-2.4812	-1.3718
	-0.33679	1.4298	-0.39653
	-0.25138	0.71471	0.39529
	-0.25646	-1.9886	-0.41872
	-0.30419	-1.4761	1.5978
	-0.2014	0.17949	0.35133
	0.018031	-0.21523	1.0242
	-0.13692	0.0048731	-0.064513
	-0.37076	0.20751	-0.24161
	-0.24076	-0.46335	0.1469
	0.072204	0.64568	-0.47378
	0.23005	1.8233	0.77066
	0.18747	0.34436	-0.56521
	0.17387	-0.6936	-0.14957
	0.29324	1.0875	-0.60157
	0.2765	1.7312	-0.59479
	0.025517	-0.62253	-0.46885
	-0.17516	-1.1809	-0.66793
	-0.1015	0.71309	-0.53418
	0.11084	0.7338	-0.48569
	0.063832	-0.63187	0.79922
	-0.14062	-1.0055	0.12656
	-0.083956	-0.41827	0.81381
	0.093696	-0.3338	1.0864
	0.03582	-0.27167	0.45241
	-0.11736	-0.23391	0.49699
	-0.04556	-0.6538	0.22271
	0.15278	-0.077157	0.14464
	0.21532	0.71675	0.24018
	-0.041777	0.13848	0.49802
	-0.215	-0.51695	0.10622
	-0.10295	0.11411	-0.045816
	-0.099733	0.86862	-0.47665
	-0.10537	0.25462	-0.15656
	-0.060612	-0.48284	-0.37352
	0.0094984	0.21157	-0.61205
	0.14731	0.63715	-0.1695
	0.10939	0.29482	-0.648
	-0.073009	0.13969	0.0039036
	0.021814	0.010964	-0.17792
	0.18538	-0.13482	-0.1091
	0.13934	0.028426	0.40166
	0.06681	0.071065	-0.12615
	-0.043628	-0.22254	0.30099
	-0.035096	-0.21523	0.30058
	0.043789	-0.20142	0.096769
	-0.063913	-0.30619	0.39242
	-0.1733	-0.21117	-0.053829
	-0.15696	-0.14903	0.21408
	-0.17797	-0.33462	0.36263
	-0.11994	-0.2936	-0.024038
	-0.04395	0.03533	0.33715
	-0.098284	0.11817	-0.14485
	0.025597	-0.12832	0.14793
	0.19971	-0.069035	0.24038
	0.20848	0.37807	-0.064307
	0.22031	0.67979	0.048076
	0.19745	0.70903	-0.11916
	0.1168	0.37969	0.27099
	0.16131	0.057258	-0.071704
	0.1366	0.14538	-0.21203
	-0.020365	0.37726	-0.43228
	0.019963	0.0077157	-0.0055473
	0.071962	-0.5206	0.13149
	-0.019641	-0.3935	-0.03842
	-0.089349	-0.014213	0.40084
	-0.22434	-0.018274	-0.072115
	-0.29429	-0.42436	0.16868
	-0.1795	-0.59614	0.060609
	-0.16477	-0.42923	0.070265
	-0.10843	-0.30213	0.070265
	0.044755	-0.094618	-0.035544
	0.066086	0.25584	0.15039
	0.13612	0.27614	-0.025682
	0.2051	0.12183	-0.12841
	0.10939	0.45888	-0.30962
	0.11132	0.82842	0.065951
	0.15986	0.3736	-0.047665
	0.078804	-0.11005	0.084442
	0.10142	0.27411	0.033695
	0.085405	0.5868	0.0014382
	-0.007969	0.15228	0.09718
	0.016501	-0.37604	-0.20648
	-0.075262	-0.44873	0.35461
	-0.163	-0.21969	-0.062458
	-0.077275	-0.26639	0.080538
	-0.12734	-0.48284	0.35194
	-0.15761	-0.48771	0.05424
	-0.028576	-0.26355	0.25209
	-0.03904	0.0069035	-0.081565
	-0.0055541	0.071471	-0.014382
	0.08468	0.031269	-0.12779
	0.028576	0.083248	-0.042324
	0.084036	0.26396	-0.035544
	0.14948	0.20548	0.023011
	0.055541	0.10477	0.017669
	0.08629	0.19898	-0.10211
	0.08138	0.2871	0.20771
	-0.025114	0.30619	-0.13375
	0.037349	0.16203	0.08588
	0.024712	0.087309	-0.14135
	-0.052804	-0.044264	-0.034311
	-0.019882	-0.24122	0.12903
	-0.088464	-0.2071	-0.1958
	-0.12573	-0.26558	0.29298
	-0.069467	-0.27289	-0.060198
	-0.14248	-0.13929	0.08362
	-0.12026	-0.10761	0.21285
	-0.023424	-0.12832	0.063075
	-0.05208	-0.15106	0.20258
	-0.00096593	0.0040609	-0.018285
	0.083392	-0.02802	0.078689
	0.10392	-0.24528	0.048898
	0.13451	-0.050761	-0.016231
	0.083231	0.32974	-0.077867
	-0.0034613	0.25705	-0.09492
	0.016984	0.1068	-0.19395
	0.03252	0.20873	0.034722
	0.0039442	0.18883	0.083209
	0.010545	0.11614	-0.21573
	0.020204	-0.11249	0.075607
	0.025275	-0.27492	0.026915
	0.019399	-0.11452	0.050953
	-0.0022538	0.081624	0.064718
	-0.025919	0.098273	0.0565
	-0.055058	0.043045	0.098413
	-0.031393	0.036954	0.143
	0.0070835	0.019086	0.30161
	0.0075665	0.076345	-0.052802
	0.032842	-0.03005	0.1958
	0.030829	-0.17665	0.1395
	-0.0069225	-0.088933	-0.098002
	-0.014328	0.048324	0.21182
	-0.048699	0.10112	-0.15265
	-0.055058	0.045076	-0.24408
	0.018836	0.028832	0.056295
	0.047331	0.02071	-0.087935
	0.074538	-0.051979	-0.027942
	0.14006	-0.12751	0.16354
	0.12259	-0.015025	-0.072525
	0.095869	0.068223	0.12697
	0.071238	-0.041827	0.19251
	-0.01634	0.061319	-0.035749
	-0.047331	0.17827	0.17258
	-0.055622	0.10964	0.13786
	-0.085405	-0.0048731	0.11855
	-0.031634	-0.13929	0.13046
	0.030024	0.020304	0.066156
	0.038959	0.26518	-0.084031
	0.070755	0.12589	-0.12389
	0.036223	0.010558	0.01582
	-0.035418	0.042233	-0.15943
	-0.020285	0.019086	-0.014793
	-0.015213	0.12386	0.13313
	-0.011189	0.080405	-0.17361
	0.037188	-0.18112	0.033284
	-0.01795	-0.091776	0.10807
	-0.10843	0.066598	-0.13478
	-0.084761	-0.20426	0.38194
	-0.093535	-0.40528	0.26195
	-0.068903	-0.22172	0.035749
	0.035337	-0.061319	0.39653
	0.030427	-0.12792	0.038009
	0.02278	-0.17178	0.03616
	0.031956	-0.061725	0.29709
	-0.037832	0.083654	-0.055678
	-0.018192	0.092994	-0.1317
	0.029944	0.090964	-0.017053
	-0.038879	0.19167	-0.2562
	-0.016421	0.16771	-0.062869
	0.032842	0.10964	-0.03164
	0.023021	0.1401	-0.1054
	0.11575	0.1064	0.12368
	0.12718	0.13157	-0.03842
	0.037269	0.19939	0.0065745
	0.033969	0.056446	-0.00061636
	0.0057956	-0.016244	0.075402
	0.0055541	0.087715	0.0076018
	0.064235	-0.027208	-0.073142
	0.0024148	-0.19898	-0.010889
	-0.03413	-0.089339	-0.30469
	-0.02922	-0.036142	-0.029585
	-0.13539	-0.19939	-0.0036982
	-0.14336	-0.17705	-0.085264
	-0.082265	-0.041015	0.15882
	-0.099008	-0.05604	0.21429
	0.00064396	-0.082436	0.26689
	0.081943	0.010558	0.33633
	0.063671	0.021929	0.1995
	0.13885	-0.059289	0.00904
	0.1209	0.10924	0.15512
	0.042662	0.18802	-0.16827
	0.059888	-0.077157	-0.098002
	-0.014891	-0.071065	-0.017258
	-0.082104	0.18639	-0.22395
	-0.045077	0.057258	-0.036571
	-0.080173	-0.057664	-0.13252
	-0.077677	0.15228	-0.039858
	-0.013362	0.21766	-0.055678
	-0.01465	0.23391	0.068211
	0.062705	0.2335	0.075607
	0.12493	0.0024365	0.077662
	0.11487	-0.27533	0.25764
	0.18329	-0.11046	0.054651
	0.14215	0.068629	0.15532
	0.050068	-0.30375	0.10725
	0.049424	-0.33868	0.054445
	-0.025758	0.043857	0.11218
	-0.11052	-0.071471	-0.0036982
	-0.14312	-0.36629	-0.12512
	-0.19633	-0.2201	0.039858
	-0.16614	0.016244	0.086085
	-0.083231	0.16203	-0.10355
	-0.072043	0.2599	0.18101
	-0.038396	0.19858	0.17279
	0.035659	0.1933	0.15717
	0.12211	0.2871	0.18737
	0.18224	0.26883	-0.0084236
	0.15954	0.039797	-0.082182
	0.137	-0.074314	0.070265
	0.13314	0.097461	0.011711
	0.10432	0.10964	-0.23463
	0.043145	-0.10152	-0.0065745
	-0.048941	-0.049543	-0.24223
	-0.079931	0.0934	-0.19189
	-0.057312	-0.097055	0.11341
	-0.081139	-0.22335	-0.0086291
	-0.041777	-0.29238	0.27551
	0.019641	-0.40406	0.44851
	-0.0041052	-0.21157	0.24038
	0.00072445	-0.07269	0.21634
	-0.028817	-0.22985	0.26771
	-0.099411	-0.088121	-0.013355
	-0.069386	0.28101	0.1432
	-0.062464	0.16487	0.11875
	-0.10915	-0.05604	-0.19333
	-0.051356	0.18274	-0.041707
	-0.011269	0.44061	-0.27079
	-0.015052	0.23512	-0.36591
	0.028978	-0.026396	-0.094304
	0.00072445	0.16771	-0.15923
	0.0046687	0.30578	-0.22641
	0.072848	0.12386	-0.034927
	0.036384	0.039797	-0.059376
	0.054656	-0.088121	0.073347
	0.14062	-0.25908	0.22703
	0.10472	-0.052385	0.083825
	0.075423	0.043451	0.13663
	0.05699	-0.19817	0.26832
	0.0038637	-0.11411	0.18963
	0.045721	0.1137	0.0051364
	0.0099008	0.01665	0.29729
	-0.10625	-0.1466	0.15183
	-0.088303	-0.1799	0.068827
	-0.060532	-0.13726	0.27264
	-0.073089	-0.036142	-0.18018
	-0.030829	0.0012183	-0.019107
	-0.031232	-0.00081218	0.073964
	-0.037269	0.019898	-0.16765
	0.047009	0.062538	0.017875
	0.036464	0.14741	-0.031229
	-0.015133	0.1336	-0.17669
	0.025517	0.049949	0.0339
	0.0031393	0.090964	-0.036365
	-0.011672	0.12061	-0.2449
	0.039362	0.067817	0.02938
	-0.0074055	0.14254	-0.030202
	0.0053126	0.13604	-0.056911
	0.071721	-0.09137	0.14649
	0.011752	-0.11046	0.039036
	0.043065	-0.0064974	0.12718
	0.087417	-0.099898	0.21182
	0.015938	-0.12751	0.077251
	0.051919	-0.064568	0.12759
	0.067454	-0.027614	0.18696
	-0.011028	0.056852	0.031229
	0.0086129	0.053604	0.028764
	-0.031393	-0.064568	0.090195
	-0.079448	-0.081218	0.0028764
	0.016984	0.049543	0.018285
	0.007325	0.067817	0.085058
	-0.0074055	0.034517	0.020751
	0.066971	0.10396	0.071909
	0.010947	0.14944	0.078689
	0.011591	0.1531	-0.058144
	0.078563	0.073502	0.10355
	0.0051517	-0.019086	0.047255
	0.034935	-0.092994	-0.043967
	0.064798	-0.11533	0.064718
	-0.037832	-0.050355	-0.077867
	-0.025678	-0.088527	-0.070471
	-0.046767	-0.16447	-0.0043145
	-0.12251	-0.033705	0.0020545
	-0.048216	0.026802	0.064307
	-0.017306	-0.099085	0.11238
	-0.030266	-0.052791	0.070265
	0.056829	0.098679	0.01582
	0.026241	0.034517	0.0113
	0.020687	-0.043451	-0.019313
	0.10488	0.12386	0.019518
	0.016421	0.15716	0.030407
	-0.025356	0.079187	-0.0020545
	0.014328	0.11086	0.025271
	-0.04226	0.12751	0.079511
	-0.0029783	-0.0085278	-0.0018491
	0.039684	-0.086903	-0.04068
	-0.028656	-0.0467	0.025476
	0.014167	-0.066192	0.041707
	0.027046	-0.13604	0.048282
	-0.019802	-0.023959	0.029585
	0.044594	0.23309	0.018696
	0.045882	0.27939	0.041502
	0.034693	0.032893	0.10211
	0.095467	-0.94456	0.042324
	0.042179	-0.53076	0.10478
	-0.026402	0.9941	-0.017258
	-0.051436	0.12589	-0.22456
	-0.13282	-1.4412	-0.018902
	-0.15415	0.12223	0.06102
	-0.12171	1.6861	-0.021984
	-0.1337	-0.54416	-0.084647
	-0.11672	-1.3381	0.15635
	-0.0086934	-0.0016244	0.073964
	0.11631	0.17462	0.055473
	0.070352	0.34761	-0.03616
	-0.12155	0.94862	-0.18368
	-0.15495	0.17218	0.4972
	0.0074055	-0.63918	0.05424
	0.13201	1.1107	-0.14033
	0.17548	1.403	0.33653
	0.22434	-1.185	-0.15635
	0.29984	-1.2812	-0.13293
	0.33445	1.2702	0.2525
	0.17918	0.99329	-0.05198
	-0.023987	-1.1565	-0.045611
	-0.095145	-0.81542	0.13129
	-0.10223	1.0274	-0.21265
	-0.039845	0.41583	0.10519
	-0.024229	-1.2528	-0.10499
	-0.050953	-0.56527	0.21552
	0.04234	0.31675	0.69813
	0.059164	-0.30538	-0.10581
	-0.1362	-0.55066	0.089989
	-0.27352	0.22782	-0.054856
	-0.19753	0.30457	-0.024244
	-0.084761	0.08406	-0.11218
	-0.041455	0.44101	-0.010273
	-0.02761	0.39918	0.51302
	0.046445	-0.24568	-0.24018
	0.19335	0.028832	-0.044789
	0.1531	0.76669	0.16046
	-0.014087	-0.095025	-0.24839
	-0.037832	-0.7537	-0.26853
	0.0010464	0.49299	-0.22518
	0.037832	0.80162	-0.078689
	0.054092	-0.56	0.19107
	-0.0042662	-0.59289	-0.099235
	0.032842	0.41299	0.081771
	0.1337	0.11817	0.54014
	0.054736	-0.73258	-0.099851
	0.0034613	-0.4268	0.17197
	0.051436	0.20264	0.43844
	0.060934	0.077563	-0.062664
	0.06995	-0.011777	0.065335
	-0.025758	0.2002	0.36304
	-0.16236	0.070659	0.13498
	-0.082185	0.045482	0.0014382
	-0.024792	0.27695	-0.05198
	-0.10456	0.10071	-0.18347
	-0.028576	-0.25584	0.016436
	0.039442	-0.048731	-0.28455
	0.036223	0.18761	-0.14711
	0.039281	-0.055228	0.077662
	-0.062705	0.028832	-0.21367
	-0.091281	0.22294	0.028353
	0.019963	-0.032487	0.12389
	0.032359	-0.15066	0.034927
	0.038557	0.077969	-0.049309
	0.10448	-0.031269	-0.034311
	0.093776	-0.24812	0.17813
	0.13757	-0.2071	0.063896
	0.12412	-0.1068	-0.065951
	-0.039603	0.060913	0.13396
	-0.090556	0.17015	-0.0055473
	-0.093454	0.090151	0.013149
	-0.1407	-0.045076	0.15121
	-0.086129	0.040203	-0.041707
	-0.066167	0.20995	0.054035
	-0.041857	0.011777	-0.043145
	0.08951	-0.307	-0.018902
	0.084117	-0.059695	0.070471
	0.067937	0.27248	-0.10026
	0.096432	0.18071	0.017464
	0.0028173	0.015025	0.1319
	0.0021734	0.098679	0.0452
	0.069386	0.14985	0.17053
	0.011672	-0.073502	0.20402
	0.041616	-0.1933	-0.024038
	0.090878	-0.01665	0.20813
	0.020687	0.021929	0.10663
	0.0056346	-0.23675	-0.017875
	-0.068179	-0.11452	0.0080127
	-0.14682	0.14579	-0.18244
	-0.07977	-0.012589	0.069033
	-0.083634	-0.24365	-0.072936
	-0.092327	-0.11492	-0.12964
	0.016662	0.10924	0.057322
	0.064476	0.069441	-0.037598
	0.07486	-0.0085278	0.014998
	0.072445	0.039797	-0.025887
	0.01634	0.070253	-0.097591
	-0.0016904	0.090558	-0.016436
	-0.0042662	0.13766	-0.075402
	-0.010867	-0.00040609	0.11773
	0.013282	-0.091776	0.23894
	0.040328	0.17584	-0.0039036
	0.060049	0.23837	0.28394
	0.066086	-0.030457	0.16909
	0.063188	-0.11939	-0.061636
	0.068018	-0.058477	0.21717
	0.055944	0.20183	0.050131
	0.033808	0.10436	0.077456
	-0.00040247	0.19086	0.086702
	-0.042501	-0.11005	-0.11629
	-0.027207	-1.0798	0.20854
	-0.020043	0.044264	-0.035544
	-0.072848	1.3076	-0.40598
	-0.10883	-0.787	-0.044995
	-0.16976	-1.7113	-0.10971
	-0.15946	1.0822	0.088345
	-0.047653	1.064	0.073142
	-0.087256	-1.1017	-0.14793
	-0.14304	-0.63228	0.27284
	0.023987	0.95106	0.050953
	0.16992	0.045888	0.16375
	0.13515	-1.1192	0.074375
	0.049826	1.1785	0.078689
	0.0039442	1.6719	0.21922
	0.10714	-1.39	-0.24182
	0.13942	-0.88933	0.052391
	0.039523	2.7163	0.15984
	0.13362	0.74558	0.050336
	0.19786	-2.4499	-0.31003
	0.072848	0.12711	0.10684
	0.10086	1.9626	-0.014793
	0.11124	-0.69279	-0.17998
	-0.11857	-1.4615	-0.021367
	-0.19769	0.77035	-0.084031
	-0.10585	0.040203	0.53891
	-0.055139	-1.4355	-0.46022
	-0.088785	0.37116	0.27428
	-0.15874	1.0623	0.60773
	-0.036786	-1.3031	0.049925
	0.079931	-0.99492	0.20771
	-0.056427	1.2597	-0.028353
	-0.083473	0.32446	0.36612
	0.093052	-1.2065	-0.31352
	0.082909	0.1531	-0.05424
	-0.0011269	1.2845	0.26915
	0.070674	-0.16934	0.10704
	0.048377	-0.59045	-0.40105
	-0.016501	1.0371	-0.034516
	-0.018755	0.76507	0.06102
	-0.042823	-0.73543	-0.68437
	0.019238	-0.1734	-0.17381
	0.026161	0.71593	-0.16765
	-0.041616	0.12954	0.45857
	0.036545	-0.49746	-0.38194
	0.039281	0.070659	-0.034311
	-0.059244	0.39715	0.87729
	0.063832	-0.2534	-0.10478
	0.12565	-0.42964	0.28003
	0.039925	0.043857	0.20381
	0.095547	-0.0467	0.37906
	0.12485	-0.35127	0.13581
	0.11881	-0.044264	-0.23175
	0.075021	0.076345	0.44091
	-0.11487	-0.20304	0.30079
	-0.13909	-0.3334	-0.4255
	-0.014087	0.17705	0.031024
	-0.085485	0.29766	0.22867
	-0.098123	-0.22335	-0.39098
	-0.0095789	-0.19208	-0.0565
	-0.056346	0.35614	-0.22292
	-0.036142	0.4735	0.058144
	-0.024551	-0.060101	-0.27017
	-0.065925	-0.14903	-0.49843
	0.028898	0.26802	0.34414
	0.044916	0.2534	-0.057322
	-0.016501	-0.23919	-0.16395
	0.082909	-0.19939	0.21655
	0.085002	0.14172	0.2221
	0.0063591	0.095837	0.012122
	0.062383	-0.060101	0.068211
	0.0057956	-0.015025	0.091427
	-0.011672	0.0024365	0.35277
	0.089993	-0.21279	0.039858
	0.010384	-0.092994	-0.14094
	-0.025436	0.10924	0.26956
	0.03904	-0.026802	-0.072115
	8.05E-05	-0.24446	0.083415
	0.046123	-0.065786	0.062869
	0.03582	0.31147	0.10478
	-0.076953	0.20873	0.092044
	0.022056	-0.0016244	-0.12533
	0.065764	-0.0048731	0.08136
	-0.00080495	0.047918	0.10211
	0.037752	0.039797	-0.18676
	0.0045077	-0.018274	-0.17484
	-0.043709	-0.0012183	0.12533
	-0.013201	-0.061319	-0.11711
	-0.057554	-0.31756	0.077456
	-0.084358	-0.21848	0.049515
	-0.048699	0.1998	0.13848
	-0.063591	-0.12711	0.18553
	-0.033083	-0.55675	-0.13416
	0.0087739	-0.012995	0.097591
	-0.037108	0.53928	0.0565
	-0.033164	0.11777	0.076018
	0.047331	-0.30375	-0.15676
	0.073009	0.15716	0.015615
	0.062061	0.47553	0.019724
	0.044916	0.03736	-0.16847
	0.035498	-0.18152	0.068005
	0.01634	0.18924	0.042735
	-0.01465	0.22497	0.11629
	-0.0026563	-0.072284	-0.10129
	-0.015938	0.1401	0.086702
	-0.037913	0.28507	0.10375
	-0.0065201	-0.27208	0.1017
	0.052804	-0.40609	0.043351
	0.070594	0.098679	0.0080127
	0.017387	0.14051	0.40639
	-0.024309	-0.19046	-0.082387
	0.0037027	-0.33624	0.10992
	0.031876	-0.23431	0.34599
	0.034693	0.0467	-0.039242
	0.059244	-0.0016244	-0.048898
	0.013443	-0.23269	-0.027736
	-0.071479	-0.11452	-0.08814
	-0.040006	0.18193	-0.092455
	0.00072445	0.36101	-0.024038
	-0.038154	-0.05401	-0.16601
	-0.068984	-0.42842	0.20915
	-0.082668	-0.033299	-0.083209
	-0.067776	0.54294	-0.21018
	-0.047492	0.56893	0.33263
	-0.069467	-0.033705	0.019313
	-0.00040247	-0.3533	0.196
	0.13386	0.41137	0.29462
	0.13757	0.95593	-0.046638
	0.12911	-0.17178	-0.18779
	0.19391	-0.85725	-0.053624
	0.17435	0.27655	0.025271
	0.09603	0.56812	0.016436
	0.015696	-0.50314	0.018491
	-0.076872	-0.46619	-0.093687
	-0.070755	0.21441	0.17094
	-0.061417	0.025177	-0.059787
	-0.17918	-0.32528	0.0452
	-0.18095	-0.29563	0.42365
	-0.073733	-0.37563	0.30654
	-0.013121	-0.32853	0.13807
	0.060612	0.07472	-0.0051364
	0.007325	-0.048731	0.17895
	-0.072043	-0.4333	-0.15697
	0.036867	0.0064974	0.010273
	0.083875	0.68142	0.12923
	0.032439	0.31959	-0.088345
	0.0326	-0.093806	0.03842
	0.0077275	0.55756	-0.226
	0.055702	0.75086	-0.05876
	0.13314	0.071878	-0.0339
	0.090073	-0.069035	-0.16642
	0.1135	0.1998	-0.21511
	0.14368	0.1604	-0.037598
	0.05047	0.031675	-0.11957
	0.018755	-0.077157	-0.013971
	0.015455	-0.21726	0.45221
	-0.013523	-0.18152	0.012738
	0.028576	-0.051979	0.048282
	-0.018111	-0.14294	0.0452
	-0.096835	-0.26964	-0.056295
	-0.007003	-0.14497	0.068005
	-0.0090959	-0.037766	-0.049309
	-0.11937	-0.16081	0.060609
	-0.13901	-0.16244	0.25291
	-0.14553	0.051979	0.22045
	-0.042501	0.086091	0.080333
	0.08146	-0.032487	0.31003
	0.036706	0.013807	0.11115
	0.077355	0.12386	0.069033
	0.15125	0.18152	0.12615
	0.086049	0.2936	-0.057733
	0.05208	0.24325	-0.089167
	-0.014409	-0.011777	-0.2638
	-0.091039	-0.037766	-0.069444
	-0.036303	0.12629	-0.24757
	-0.063671	-0.051979	-0.3127
	-0.12718	-0.26193	-0.039858
	-0.068662	0.014619	0.012944
	-0.060934	0.1064	0.19354
	-0.03421	-0.24731	0.21552
	0.011189	-0.27858	0.12019
	-0.013926	0.059695	0.23812
	0.068742	-0.071471	0.18963
	0.13684	-0.38944	-0.051775
	0.063671	-0.072284	0.15183
	0.025275	0.19127	-0.073964
	-0.013604	-0.036954	-0.050542
	-0.0879	-0.095837	0.13539
	-0.0912	0.10883	-0.10643
	-0.087981	0.11939	0.075813
	-0.076228	0.027208	0.065951
	-0.013443	0.060913	0.11464
	0.045077	0.01137	0.1845
	0.11036	-0.037766	0.085264
	0.12211	0.13198	-0.069855
	0.066489	0.20264	-0.027942
	0.037671	-0.017462	-0.0088345
	0.018836	-0.0934	-0.068416
	-0.0018514	-0.010152	0.024655
	-0.040086	-0.064568	-0.13437
	-0.11591	-0.10843	-0.12225
	-0.13773	-0.099492	-0.059787
	-0.14376	-0.076751	0.079305
	-0.15028	-0.027208	-0.096769
	-0.061176	-0.085278	0.07006
	-0.0035418	-0.067411	0.24737
	0.053046	0.092588	-0.057733
	0.18828	-0.014213	0.26113
	0.1948	-0.11858	0.013149
	0.14578	0.087715	-0.048076
	0.13016	0.20954	0.22826
	0.023826	0.16081	-0.0061636
	-0.011672	0.12386	-0.0016436
	0.0053931	0.19411	0.14423
	-0.067937	0.27045	-0.0030818
	-0.023746	0.07269	0.039653
	0.050792	-0.12264	0.16621
	0.020526	0.047106	-0.16251
	0.078885	0.12183	0.085058
	0.092086	-0.004467	0.17032
	0.016984	-0.02071	-0.033284
	0.062142	0.043045	0.10869
	0.054736	0.066192	0.071498
	-0.0055541	0.015837	-0.073553
	0.030024	-0.20832	-0.040269
	-0.014891	-0.21563	0.061225
	-0.060693	0.079187	-0.12163
	-0.020043	0.060507	0.022395
	-0.06351	-0.088527	-0.0026709
	-0.070352	0.024771	0
	-0.0058761	0.26071	0.1882
	-0.018192	0.052791	0.014176
	0.028173	-0.096243	0.081565
	0.13282	0.090558	0.14526
	0.091361	0.03533	0.065335
	0.053287	-0.11046	-0.0084236
	0.053931	-0.0085278	0.15039
	-0.050953	0.17259	0.031845
	-0.046687	0.02071	-0.043967
	-0.016582	-0.12954	0.078689
	-0.10384	0.0069035	-0.0094509
	-0.055058	0.0081218	0.010684
	-0.0025758	-0.1531	-0.010684
	-0.034049	-0.014619	0.052185
	0.038154	0.039391	0.020956
	0.033727	-0.069035	0.087318
	-0.011672	-0.05401	0.012533
	0.040811	0.079999	0.081565
	-0.0067615	0.045888	0.16724
	-0.021331	-0.18193	-0.073142
	0.054656	-0.10396	0.060198
	-0.018031	0.049543	0.014587
	-0.054092	0.014619	-0.046022
	-0.007969	-0.093806	0.013149
	-0.090476	0.0089339	-0.041296
	-0.063349	0.088933	-0.028764
	0.027046	-0.02599	-0.0080127
	-0.027932	-0.022741	-0.080744
	0.036786	0.034517	0.035749
	0.083634	-0.046294	0.064307
	0.010786	-0.051573	-0.15779
	0.051678	0.12142	0.051569
	-0.0029783	0.10964	-0.020956
	-0.095869	-0.015431	-0.059993
	-0.0041052	-0.0060913	0.059376
	-0.018514	0.099492	-0.033078
	-0.061739	0.021929	0.078073
	0.032439	-0.14497	-0.017053
	-0.00088544	-0.0020304	-0.0034927
	-0.022458	0.15106	0.022395
	0.031232	0.027614	0.064513
	-0.031312	-0.06335	0.075607
	0.02286	0.042639	0.068211
	0.11897	0.0069035	0.14156
	0.039845	-0.13401	0.027325
	0.071077	-0.037766	0.097591
	0.10223	-0.018274	0.083209
	-0.010384	-0.090151	0.13642
	0.0092569	0.043045	0.053829
	-0.0051517	0.16081	0.051364
	-0.069225	0.055634	0.12656
	0.010786	-0.034924	-0.069238
	-0.00080495	-0.0073096	0.036365
	-0.010464	-0.01868	-0.048282
	0.067615	-0.0020304	-0.074991
	0.0057956	0.015431	0.052802
	-0.018755	-0.0097461	-0.035133
	0.010303	-0.012995	-0.020545
	-0.062464	0.12223	0.066978
	-0.026322	0.097867	-0.040269
	0.03751	-0.043857	0.021573
	-0.015455	-0.046294	0.12677
	0.0038637	-0.059289	-0.08362
	0.018272	-0.0056852	0.031435
	-0.0098203	0.0077157	0.077251
	0.028656	0.071471	-0.0061636
	0.028173	0.012589	0.06328
	-0.0019319	-0.12061	0.08362
	0.015294	0.060101	0.070676
	0.032922	0.073908	0.13129
	0.071318	-0.17137	0.20566
	0.096432	-0.07269	0.034105
	0.048216	0.11898	0.10663
	0.0086129	0.071878	0.12307
	0.00048297	0.10883	-0.0113
	0.01795	0.093806	0.066567
	0.030427	0.0012183	0.046022
	0.0033808	0.06538	-0.08136
	-0.0010464	0.095837	0.024655
	-0.0053931	-0.049949	0.059787
	-0.028415	-0.043045	-0.12964
	-0.014248	0.080405	0.14957
	-0.029139	0.077563	0.014587
	-0.059646	0.0048731	-0.10992
	-0.042743	-0.060101	0.22559
	-0.025919	0.019086	-0.031024
	0.023826	0.0032487	-0.016231
	0.084761	-0.13766	0.12471
	0.065201	-0.0085278	-0.067595
	0.03582	0.067411	-0.053624
	0.042018	-0.065786	0.0020545
	-0.006681	0.034517	-0.17957
	-0.035337	0.08203	-0.022189
	-0.027127	-0.080405	0.12944
	-0.067213	-0.076751	-0.092865
	-0.059727	-0.021929	0.10807
	-0.035176	-0.06335	0.1356
	-0.040006	-0.0056852	0.0059582
	-0.0018514	0.0028426	0.10684
	0.00032198	0.0097461	0.16436
	-0.033566	0.087715	-0.021367
	-0.012316	0.15431	0.061636
	0.0024148	0.19573	0.15491
	0.018755	0.45888	-0.10252
	0.097559	0.51736	0.08814
	0.13909	-0.17015	0.071087
	0.16026	-1.323	0.017053
	0.21363	-0.72974	0.10458
	0.13233	1.4891	-0.2184
	-0.05039	-0.1137	-0.42981
	-0.18103	-2.0788	0.096769
	-0.25919	0.31919	0.11916
	-0.22933	2.3338	0.029996
	-0.16276	-1.0534	0.056295
	-0.20156	-3.0205	0.13868
	-0.093696	1.2637	0.23278
	0.081058	0.98679	-0.22395
	-0.10714	-1.0132	0.20176
	-0.34323	2.3898	0.14443
	-0.22893	1.2264	0.32914
	0.039684	-2.932	0.032051
	0.28559	2.0166	0.064513
	0.40722	4.192	0.2864
	0.51766	-3.3892	-0.53377
	0.68485	-3.6649	0.29257
	0.57586	4.3366	-0.16046
	0.22667	2.551	0.037187
	-0.16171	-4.6899	-0.026504
	-0.37535	-1.1833	-0.88037
	-0.28793	3.252	0.13807
	-0.12356	-0.75573	-0.30243
	-0.23335	-2.7866	0.1734
	-0.36408	0.9539	0.71231
	-0.094501	0.010558	0.83353
	0.036464	-1.8725	0.31969
	-0.18506	1.3799	0.064924
	-0.33413	1.3758	0.27223
	-0.14376	-1.7701	-0.52473
	0.23054	0.11614	0.25024
	0.28085	3.308	0.10191
	0.175	0.26964	0.31003
	0.27505	-1.9354	-0.63732
	0.27175	1.3133	-0.46823
	0.1593	1.9204	0.15717
	0.032842	-1.5379	-0.934
	-0.17693	-1.1269	-0.34126
	-0.12404	1.1959	-0.75299
	0.076711	0.095837	0.095536
	0.01795	-1.2325	0.56788
	-0.089671	-0.078781	-0.13498
	-0.063913	0.29847	0.73943
	0.051275	-0.92547	1.0758
	0.092971	-0.4203	0.027531
	0.0025758	0.18761	0.46844
	0	-0.48203	0.48302
	0.1238	-0.026802	-0.3766
	0.12332	0.91938	0.17423
	-0.075745	0.24203	0.051775
	-0.1915	-0.27979	0.36571
	-0.1531	0.54172	-0.44008
	-0.00813	0.72487	-0.39571
	0.042984	-0.27127	0.18306
	-0.0061981	-0.34233	-0.61143
	0.077033	0.29482	-0.078689
	0.14433	0.16244	-0.36427
	0.041455	0.040609	0.034927
	-0.11857	0.087309	0.15594
	-0.10464	-0.16122	-0.37927
	0.014731	-0.19817	0.52021
	0.049343	0.047512	0.23792
	-0.0088544	-0.27411	-0.26113
	-0.018675	-0.57664	0.48652
	0.023907	-0.07269	0.20669
	0.019158	0.14254	-0.10252
	-0.014167	-0.37929	0.18573
	-0.12131	-0.10721	-0.17073
	-0.16196	0.3602	0.32811
	-0.069467	-0.14619	0.14074
	-0.039362	-0.29238	-0.079922
	-0.045479	0.10883	0.27449
	-0.0025758	0.027614	0.00061636
	0.025034	-0.16731	-0.059993
	0.11261	0.076345	0.067184
	0.15656	0.31553	0.13067
	0.086049	0.44629	-0.38625
	0.10625	0.40203	-0.0088345
	0.06504	0.2469	0.14916
	0.016662	0.048731	-0.09944
	0.066891	0.014619	-0.13334
	-0.0086129	0.16487	-0.18265
	-0.036947	0.023553	0.16929
	0.05039	-0.29076	0.128
	0.0024953	-0.24853	0.38646
	-0.088866	0.04467	0.017053
	-0.10625	-0.12183	0.086702
	-0.16719	-0.36832	0.082182
	-0.16534	-0.42193	-0.17854
	-0.0813	-0.41786	0.17484
	-0.091844	-0.18396	-0.2186
	-0.054495	0.12386	-0.097796
	0.057071	0.20142	0.18142
	0.098525	0.090151	-0.017875
	0.12404	0.16771	-0.2712
	0.093293	0.42517	0.058555
	0.03574	0.4804	-0.014998
	0.10054	0.12914	0.00452
	0.1366	0.019492	0.38975
	0.079368	0.31431	-0.0039036
	0.11648	0.38335	0.13971
	0.10891	0.17624	0.12389
	0.011511	-0.16609	0.076018
	0.041052	-0.45604	0.11567
	0.015374	-0.31512	-0.083825
	-0.095708	0.039797	0.012122
	-0.10625	-0.25259	0.1847
	-0.17226	-0.55675	0.054035
	-0.16912	-0.13766	-0.18553
	-0.061256	0.22294	0.14793
	-0.09434	0.1332	-0.21326
	-0.007164	-0.20304	-0.21285
	0.1275	-0.076345	0.22395
	0.085002	0.26761	-0.097591
	0.15061	0.24284	-0.011711
	0.17194	0.066192	0.066773
	0.045882	0.20507	0.21347
	0.08307	0.4471	0.04294
	0.11076	0.18477	0.030613
	0.038959	0.064974	0.023833
	0.082185	0.12914	-0.10458
	0.049424	-0.1003	0.13868
	-0.065523	-0.30457	-0.21881
	-0.075423	-0.13442	0.11773
	-0.15552	-0.030457	0.13622
	-0.17065	-0.20589	-0.13991
	-0.057473	-0.19695	0.26113
	-0.11245	0.043045	0.13724
	-0.054656	0.029238	0.091016
	0.14626	-0.17543	0.063075
	0.1106	0.0012183	0.090605
	0.11422	0.10761	0.14259
	0.156	-0.033705	-0.012533
	0.030266	0.10071	0.029175
	0.037591	0.30944	0.12677
	0.033003	0.18883	-0.10149
	-0.031393	0.072284	-0.15635
	0.076228	0.090964	0.13396
	0.041938	-0.020304	-0.055267
	-0.036142	-0.13969	-0.12471
	0.052643	-0.1868	-0.0049309
	-0.020526	-0.1734	0.077251
	-0.088544	-0.08406	0.067184
	-0.016099	-0.1003	0.035544
	-0.07977	-0.11695	0.21758
	-0.088303	-0.011777	0.071087
	-0.024792	-0.010558	0.18306
	-0.090234	-0.12264	0.098207
	-0.083231	-0.028426	-0.064513
	-0.0619	0.15513	0.019929
	-0.10762	-0.054822	-0.091838
	-0.045721	-0.11492	-0.035338
	-0.0045077	0.18152	-0.0452
	-0.014489	0.19614	-0.12245
	0.068742	-0.029644	-0.21039
	0.077516	-0.010152	0.0053418
	0.029461	0.11817	0.055884
	0.060532	0.043857	0.031435
	0.072687	-0.061319	0.092455
	0.084197	-0.031675	0.076224
	0.077838	0.034924	0.11033
	0.042743	-0.12142	0.029791
	0.026322	-0.2201	0.1243
	-0.016501	-0.0467	-0.043556
	-0.058278	0.031675	0.0092455
	-0.07816	-0.069035	0.11279
	-0.10657	-0.027208	-0.05198
	-0.10988	0.077157	0.08136
	-0.082909	0.0934	0.0051364
	-0.041857	0.039797	0.0084236
	0.0049907	-0.12304	0.17094
	0.011028	-0.030457	0.012533
	0.00813	0.095025	0.00904
	0.012235	-0.031269	0.13807
	-0.0057956	0.0060913	-0.07006
	0.042421	0.048324	0.046022
	0.09772	-0.020304	0.018696
	0.062705	0.060101	-0.18553
	0.086693	0.060507	0.078073
	0.12992	-0.073096	0.0051364
	0.091764	0.010558	-0.056089
	0.063671	0.11492	0.02034
	0.030266	0.0934	0.029585
	-0.031071	0.11167	-0.059171
	-0.058117	0.046294	0.073347
	-0.064798	0.014619	0.13786
	-0.040408	0.03005	0.02486
	0.050953	-0.11452	0.25949
	0.078804	-0.079593	0.18285
	0.064637	0.18558	0.0084236
	0.089429	0.21238	0.080949
	0.042179	0.1202	0.046844
	0.00072445	0.10436	-0.19929
	0.029783	0.07269	0.047871
	-0.012155	0.052791	-0.0076018
	-0.039603	0.010152	-0.2373
	0.028254	-0.051979	0.11259
	0.0022538	-0.0056852	-0.027325
	-0.056346	-0.05604	0.074375
	-0.071479	-0.19776	0.28127
	-0.12944	-0.12264	0.12677
	-0.080253	-0.11046	0.27202
	0.032922	-0.27614	0.34763
	0.059244	-0.24406	0.086702
	0.10859	-0.057664	0.15471
	0.10094	-0.049137	0.24264
	0.00080495	-0.10477	-0.091838
	0.011672	0.024771	-0.041296
	0.0024148	0.22091	-0.13622
	-0.098445	0.19614	-0.27962
	-0.074457	0.097055	-0.099029
	-0.030024	0.16934	0.014998
	-0.007969	0.11005	-0.032667
	0.072445	0.024771	-0.044378
	0.065845	0.19695	0.081565
	0.059968	0.20264	-0.032873
	0.094742	0.026802	0.088551
	0.01304	0.13563	-0.020135
	0.0061176	0.21604	-0.092455
	0.080495	0.062131	0.14998
	0.036223	-0.0064974	-0.048693
	0.040811	-0.22132	-0.13663
	0.054978	-0.42558	0.02938
	-0.064315	-0.15756	-0.098413
	-0.1135	-0.073908	-0.19518
	-0.1267	-0.41949	0.085675
	-0.17942	-0.29847	0.095536
	-0.11784	0.056852	0.19724
	-0.095306	-0.15959	0.23771
	-0.09281	-0.39715	0.15656
	0.019641	-0.21238	0.30818
	0.011108	0.15797	0.077045
	-0.02109	0.56568	-0.032051
	0.0055541	0.49096	0.043351
	-0.059244	-0.03533	0.099235
	0.0049102	0.047106	0.010067
	0.12179	0.61197	-0.20217
	0.064879	0.26842	-0.21162
	0.059244	-0.40284	-0.30222
	0.10062	0.012589	-0.13231
[truncated: 63,536 more rows]
